# Supplementary material for: Analysis of biopsies of gastric cancer, intestinal and diffuse, and non-atrophic gastritis: an overview of loss of heterozygosity in Mexican patients
Source: PeerJ. 2025 Feb 25;13:e18928. doi: 10.7717/peerj.18928 (PMC11869887; doi:10.7717/peerj.18928)
Supplement: Supplemental Information 1 [file peerj-13-18928-s001.xlsx]

## Sheet: Diffuse
Table S1. LOH genes in DGC. To identify relevant genes (cut-off, ≥3) cells are filled with gray.
Cancer type	Gene	Number of patients with alteration	% of occurrence (n= 7)	Chromosome	Gene cytoband	OMIM phenotype	Haploinsufficiency Predictions	Patients
DGC	ABCB7	7	100	X	q11.1|q28	300345 Microphthalmia isolated with coloboma 1 300471 Cubitus valgus with mental retardation and unusual facies 300484 Orofaciodigital syndrome VIII 300716 Mental retardation X-linked 95 300719 Deafness cataract retinitis pigmentosa and sperm abnormalities 300864 Cerebral-cerebellar-coloboma syndrome X-linked 309050 Lutheran suppressor X-linked 300010 A-11 gene 300074 X chromosome-controlling ele…	ABCB7|0.341130772|24.77%	1CG-001|3CG-035|3CG-042|3CG-047|3CG-064|3CG-173|8CG-004
DGC	ABCD1	7	100	X	q11.1|q28	300345 Microphthalmia isolated with coloboma 1 300471 Cubitus valgus with mental retardation and unusual facies 300484 Orofaciodigital syndrome VIII 300716 Mental retardation X-linked 95 300719 Deafness cataract retinitis pigmentosa and sperm abnormalities 300864 Cerebral-cerebellar-coloboma syndrome X-linked 309050 Lutheran suppressor X-linked 300010 A-11 gene 300074 X chromosome-controlling ele…	ABCD1|0.05959621|59.98%	1CG-001|3CG-035|3CG-042|3CG-047|3CG-064|3CG-173|8CG-004
DGC	ACE2	7	100	X	p22.33|p11.1	301780 Arylsulfatase C f form 300345 Microphthalmia isolated with coloboma 1 300471 Cubitus valgus with mental retardation and unusual facies 300484 Orofaciodigital syndrome VIII 300716 Mental retardation X-linked 95 300719 Deafness cataract retinitis pigmentosa and sperm abnormalities 300864 Cerebral-cerebellar-coloboma syndrome X-linked 309050 Lutheran suppressor X-linked 301067 Family with seq…	ACE2|0.103125399|50.57%	1CG-001|3CG-035|3CG-042|3CG-047|3CG-064|3CG-173|8CG-004
DGC	ACOT9	7	100	X	p22.33|p11.1	301780 Arylsulfatase C f form 300345 Microphthalmia isolated with coloboma 1 300471 Cubitus valgus with mental retardation and unusual facies 300484 Orofaciodigital syndrome VIII 300716 Mental retardation X-linked 95 300719 Deafness cataract retinitis pigmentosa and sperm abnormalities 300864 Cerebral-cerebellar-coloboma syndrome X-linked 309050 Lutheran suppressor X-linked 301067 Family with seq…	ACOT9|0.123415391|46.9%	1CG-001|3CG-035|3CG-042|3CG-047|3CG-064|3CG-173|8CG-004
DGC	ACSL4	7	100	X	q11.1|q28	300345 Microphthalmia isolated with coloboma 1 300471 Cubitus valgus with mental retardation and unusual facies 300484 Orofaciodigital syndrome VIII 300716 Mental retardation X-linked 95 300719 Deafness cataract retinitis pigmentosa and sperm abnormalities 300864 Cerebral-cerebellar-coloboma syndrome X-linked 309050 Lutheran suppressor X-linked 300010 A-11 gene 300074 X chromosome-controlling ele…	ACSL4|0.504424276|15.6%	1CG-001|3CG-035|3CG-042|3CG-047|3CG-064|3CG-173|8CG-004
DGC	ACTRT1	7	100	X	q11.1|q28	300345 Microphthalmia isolated with coloboma 1 300471 Cubitus valgus with mental retardation and unusual facies 300484 Orofaciodigital syndrome VIII 300716 Mental retardation X-linked 95 300719 Deafness cataract retinitis pigmentosa and sperm abnormalities 300864 Cerebral-cerebellar-coloboma syndrome X-linked 309050 Lutheran suppressor X-linked 300010 A-11 gene 300074 X chromosome-controlling ele…	ACTRT1|0.005127697|85.65%	1CG-001|3CG-035|3CG-042|3CG-047|3CG-064|3CG-173|8CG-004
DGC	ADGRG2	7	100	X	p22.33|p11.1	301780 Arylsulfatase C f form 300345 Microphthalmia isolated with coloboma 1 300471 Cubitus valgus with mental retardation and unusual facies 300484 Orofaciodigital syndrome VIII 300716 Mental retardation X-linked 95 300719 Deafness cataract retinitis pigmentosa and sperm abnormalities 300864 Cerebral-cerebellar-coloboma syndrome X-linked 309050 Lutheran suppressor X-linked 301067 Family with seq…	ADGRG2|0.151606364|42.74%	1CG-001|3CG-035|3CG-042|3CG-047|3CG-064|3CG-173|8CG-004
DGC	ADGRG4	7	100	X	q11.1|q28	300345 Microphthalmia isolated with coloboma 1 300471 Cubitus valgus with mental retardation and unusual facies 300484 Orofaciodigital syndrome VIII 300716 Mental retardation X-linked 95 300719 Deafness cataract retinitis pigmentosa and sperm abnormalities 300864 Cerebral-cerebellar-coloboma syndrome X-linked 309050 Lutheran suppressor X-linked 300010 A-11 gene 300074 X chromosome-controlling ele…	ADGRG4|0.00835627|82.29%	1CG-001|3CG-035|3CG-042|3CG-047|3CG-064|3CG-173|8CG-004
DGC	AFF2	7	100	X	q11.1|q28	300345 Microphthalmia isolated with coloboma 1 300471 Cubitus valgus with mental retardation and unusual facies 300484 Orofaciodigital syndrome VIII 300716 Mental retardation X-linked 95 300719 Deafness cataract retinitis pigmentosa and sperm abnormalities 300864 Cerebral-cerebellar-coloboma syndrome X-linked 309050 Lutheran suppressor X-linked 300010 A-11 gene 300074 X chromosome-controlling ele…	AFF2|0.928741292|2.76%	1CG-001|3CG-035|3CG-042|3CG-047|3CG-064|3CG-173|8CG-004
DGC	AGTR2	7	100	X	q11.1|q28	300345 Microphthalmia isolated with coloboma 1 300471 Cubitus valgus with mental retardation and unusual facies 300484 Orofaciodigital syndrome VIII 300716 Mental retardation X-linked 95 300719 Deafness cataract retinitis pigmentosa and sperm abnormalities 300864 Cerebral-cerebellar-coloboma syndrome X-linked 309050 Lutheran suppressor X-linked 300010 A-11 gene 300074 X chromosome-controlling ele…	AGTR2|0.336815662|25.02%	1CG-001|3CG-035|3CG-042|3CG-047|3CG-064|3CG-173|8CG-004
DGC	AIFM1	7	100	X	q11.1|q28	300345 Microphthalmia isolated with coloboma 1 300471 Cubitus valgus with mental retardation and unusual facies 300484 Orofaciodigital syndrome VIII 300716 Mental retardation X-linked 95 300719 Deafness cataract retinitis pigmentosa and sperm abnormalities 300864 Cerebral-cerebellar-coloboma syndrome X-linked 309050 Lutheran suppressor X-linked 300010 A-11 gene 300074 X chromosome-controlling ele…	AIFM1|0.770044974|6.56%	1CG-001|3CG-035|3CG-042|3CG-047|3CG-064|3CG-173|8CG-004
DGC	AKAP14	7	100	X	q11.1|q28	300345 Microphthalmia isolated with coloboma 1 300471 Cubitus valgus with mental retardation and unusual facies 300484 Orofaciodigital syndrome VIII 300716 Mental retardation X-linked 95 300719 Deafness cataract retinitis pigmentosa and sperm abnormalities 300864 Cerebral-cerebellar-coloboma syndrome X-linked 309050 Lutheran suppressor X-linked 300010 A-11 gene 300074 X chromosome-controlling ele…	AKAP14|0.000395623|98.97%	1CG-001|3CG-035|3CG-042|3CG-047|3CG-064|3CG-173|8CG-004
DGC	AKAP4	7	100	X	p22.33|p11.1	301780 Arylsulfatase C f form 300345 Microphthalmia isolated with coloboma 1 300471 Cubitus valgus with mental retardation and unusual facies 300484 Orofaciodigital syndrome VIII 300716 Mental retardation X-linked 95 300719 Deafness cataract retinitis pigmentosa and sperm abnormalities 300864 Cerebral-cerebellar-coloboma syndrome X-linked 309050 Lutheran suppressor X-linked 301067 Family with seq…	AKAP4|0.058399148|60.31%	1CG-001|3CG-035|3CG-042|3CG-047|3CG-064|3CG-173|8CG-004
DGC	ALAS2	7	100	X	p22.33|p11.1	301780 Arylsulfatase C f form 300345 Microphthalmia isolated with coloboma 1 300471 Cubitus valgus with mental retardation and unusual facies 300484 Orofaciodigital syndrome VIII 300716 Mental retardation X-linked 95 300719 Deafness cataract retinitis pigmentosa and sperm abnormalities 300864 Cerebral-cerebellar-coloboma syndrome X-linked 309050 Lutheran suppressor X-linked 301067 Family with seq…	ALAS2|0.302471943|27.45%	1CG-001|3CG-035|3CG-042|3CG-047|3CG-064|3CG-173|8CG-004
DGC	ALG13	7	100	X	q11.1|q28	300345 Microphthalmia isolated with coloboma 1 300471 Cubitus valgus with mental retardation and unusual facies 300484 Orofaciodigital syndrome VIII 300716 Mental retardation X-linked 95 300719 Deafness cataract retinitis pigmentosa and sperm abnormalities 300864 Cerebral-cerebellar-coloboma syndrome X-linked 309050 Lutheran suppressor X-linked 300010 A-11 gene 300074 X chromosome-controlling ele…	ALG13|0.14657544|43.52%	1CG-001|3CG-035|3CG-042|3CG-047|3CG-064|3CG-173|8CG-004
DGC	AMELX	7	100	X	p22.33|p11.1	301780 Arylsulfatase C f form 300345 Microphthalmia isolated with coloboma 1 300471 Cubitus valgus with mental retardation and unusual facies 300484 Orofaciodigital syndrome VIII 300716 Mental retardation X-linked 95 300719 Deafness cataract retinitis pigmentosa and sperm abnormalities 300864 Cerebral-cerebellar-coloboma syndrome X-linked 309050 Lutheran suppressor X-linked 301067 Family with seq…	AMELX|0.618887456|11.12%	1CG-001|3CG-035|3CG-042|3CG-047|3CG-064|3CG-173|8CG-004
DGC	AMER1	7	100	X	q11.1|q28	300345 Microphthalmia isolated with coloboma 1 300471 Cubitus valgus with mental retardation and unusual facies 300484 Orofaciodigital syndrome VIII 300716 Mental retardation X-linked 95 300719 Deafness cataract retinitis pigmentosa and sperm abnormalities 300864 Cerebral-cerebellar-coloboma syndrome X-linked 309050 Lutheran suppressor X-linked 300010 A-11 gene 300074 X chromosome-controlling ele…	AMER1|0.051972528|62.06%	1CG-001|3CG-035|3CG-042|3CG-047|3CG-064|3CG-173|8CG-004
DGC	AMMECR1	7	100	X	q11.1|q28	300345 Microphthalmia isolated with coloboma 1 300471 Cubitus valgus with mental retardation and unusual facies 300484 Orofaciodigital syndrome VIII 300716 Mental retardation X-linked 95 300719 Deafness cataract retinitis pigmentosa and sperm abnormalities 300864 Cerebral-cerebellar-coloboma syndrome X-linked 309050 Lutheran suppressor X-linked 300010 A-11 gene 300074 X chromosome-controlling ele…	AMMECR1|0.71228947|8.2%	1CG-001|3CG-035|3CG-042|3CG-047|3CG-064|3CG-173|8CG-004
DGC	AMOT	7	100	X	q11.1|q28	300345 Microphthalmia isolated with coloboma 1 300471 Cubitus valgus with mental retardation and unusual facies 300484 Orofaciodigital syndrome VIII 300716 Mental retardation X-linked 95 300719 Deafness cataract retinitis pigmentosa and sperm abnormalities 300864 Cerebral-cerebellar-coloboma syndrome X-linked 309050 Lutheran suppressor X-linked 300010 A-11 gene 300074 X chromosome-controlling ele…	AMOT|0.349674275|24.15%	1CG-001|3CG-035|3CG-042|3CG-047|3CG-064|3CG-173|8CG-004
DGC	ANOS1	7	100	X	p22.33|p11.1	301780 Arylsulfatase C f form 300345 Microphthalmia isolated with coloboma 1 300471 Cubitus valgus with mental retardation and unusual facies 300484 Orofaciodigital syndrome VIII 300716 Mental retardation X-linked 95 300719 Deafness cataract retinitis pigmentosa and sperm abnormalities 300864 Cerebral-cerebellar-coloboma syndrome X-linked 309050 Lutheran suppressor X-linked 301067 Family with seq…	ANOS1|0.057660159|60.51%	1CG-001|3CG-035|3CG-042|3CG-047|3CG-064|3CG-173|8CG-004
DGC	AP1S2	7	100	X	p22.33|p11.1	301780 Arylsulfatase C f form 300345 Microphthalmia isolated with coloboma 1 300471 Cubitus valgus with mental retardation and unusual facies 300484 Orofaciodigital syndrome VIII 300716 Mental retardation X-linked 95 300719 Deafness cataract retinitis pigmentosa and sperm abnormalities 300864 Cerebral-cerebellar-coloboma syndrome X-linked 309050 Lutheran suppressor X-linked 301067 Family with seq…	AP1S2|0.649662017|10.13%	1CG-001|3CG-035|3CG-042|3CG-047|3CG-064|3CG-173|8CG-004
DGC	APEX2	7	100	X	p22.33|p11.1	301780 Arylsulfatase C f form 300345 Microphthalmia isolated with coloboma 1 300471 Cubitus valgus with mental retardation and unusual facies 300484 Orofaciodigital syndrome VIII 300716 Mental retardation X-linked 95 300719 Deafness cataract retinitis pigmentosa and sperm abnormalities 300864 Cerebral-cerebellar-coloboma syndrome X-linked 309050 Lutheran suppressor X-linked 301067 Family with seq…	APEX2|0.037237497|66.69%	1CG-001|3CG-035|3CG-042|3CG-047|3CG-064|3CG-173|8CG-004
DGC	APLN	7	100	X	q11.1|q28	300345 Microphthalmia isolated with coloboma 1 300471 Cubitus valgus with mental retardation and unusual facies 300484 Orofaciodigital syndrome VIII 300716 Mental retardation X-linked 95 300719 Deafness cataract retinitis pigmentosa and sperm abnormalities 300864 Cerebral-cerebellar-coloboma syndrome X-linked 309050 Lutheran suppressor X-linked 300010 A-11 gene 300074 X chromosome-controlling ele…	APLN|0.015985441|76.47%	1CG-001|3CG-035|3CG-042|3CG-047|3CG-064|3CG-173|8CG-004
DGC	APOO	7	100	X	p22.33|p11.1	301780 Arylsulfatase C f form 300345 Microphthalmia isolated with coloboma 1 300471 Cubitus valgus with mental retardation and unusual facies 300484 Orofaciodigital syndrome VIII 300716 Mental retardation X-linked 95 300719 Deafness cataract retinitis pigmentosa and sperm abnormalities 300864 Cerebral-cerebellar-coloboma syndrome X-linked 309050 Lutheran suppressor X-linked 301067 Family with seq…	APOO|0.169681543|40.36%	1CG-001|3CG-035|3CG-042|3CG-047|3CG-064|3CG-173|8CG-004
DGC	APOOL	7	100	X	q11.1|q28	300345 Microphthalmia isolated with coloboma 1 300471 Cubitus valgus with mental retardation and unusual facies 300484 Orofaciodigital syndrome VIII 300716 Mental retardation X-linked 95 300719 Deafness cataract retinitis pigmentosa and sperm abnormalities 300864 Cerebral-cerebellar-coloboma syndrome X-linked 309050 Lutheran suppressor X-linked 300010 A-11 gene 300074 X chromosome-controlling ele…	APOOL|0.101124267|50.96%	1CG-001|3CG-035|3CG-042|3CG-047|3CG-064|3CG-173|8CG-004
DGC	AR	7	100	X	q11.1|q28	300345 Microphthalmia isolated with coloboma 1 300471 Cubitus valgus with mental retardation and unusual facies 300484 Orofaciodigital syndrome VIII 300716 Mental retardation X-linked 95 300719 Deafness cataract retinitis pigmentosa and sperm abnormalities 300864 Cerebral-cerebellar-coloboma syndrome X-linked 309050 Lutheran suppressor X-linked 300010 A-11 gene 300074 X chromosome-controlling ele…	AR|0.999436019|0.35%	1CG-001|3CG-035|3CG-042|3CG-047|3CG-064|3CG-173|8CG-004
DGC	ARAF	7	100	X	p22.33|p11.1	301780 Arylsulfatase C f form 300345 Microphthalmia isolated with coloboma 1 300471 Cubitus valgus with mental retardation and unusual facies 300484 Orofaciodigital syndrome VIII 300716 Mental retardation X-linked 95 300719 Deafness cataract retinitis pigmentosa and sperm abnormalities 300864 Cerebral-cerebellar-coloboma syndrome X-linked 309050 Lutheran suppressor X-linked 301067 Family with seq…	ARAF|0.470175561|17.17%	1CG-001|3CG-035|3CG-042|3CG-047|3CG-064|3CG-173|8CG-004
DGC	ARHGAP36	7	100	X	q11.1|q28	300345 Microphthalmia isolated with coloboma 1 300471 Cubitus valgus with mental retardation and unusual facies 300484 Orofaciodigital syndrome VIII 300716 Mental retardation X-linked 95 300719 Deafness cataract retinitis pigmentosa and sperm abnormalities 300864 Cerebral-cerebellar-coloboma syndrome X-linked 309050 Lutheran suppressor X-linked 300010 A-11 gene 300074 X chromosome-controlling ele…	ARHGAP36|0.079795613|55.23%	1CG-001|3CG-035|3CG-042|3CG-047|3CG-064|3CG-173|8CG-004
DGC	ARHGAP4	7	100	X	q11.1|q28	300345 Microphthalmia isolated with coloboma 1 300471 Cubitus valgus with mental retardation and unusual facies 300484 Orofaciodigital syndrome VIII 300716 Mental retardation X-linked 95 300719 Deafness cataract retinitis pigmentosa and sperm abnormalities 300864 Cerebral-cerebellar-coloboma syndrome X-linked 309050 Lutheran suppressor X-linked 300010 A-11 gene 300074 X chromosome-controlling ele…	ARHGAP4|0.028368935|70.27%	1CG-001|3CG-035|3CG-042|3CG-047|3CG-064|3CG-173|8CG-004
DGC	ARHGAP6	7	100	X	p22.33|p11.1	301780 Arylsulfatase C f form 300345 Microphthalmia isolated with coloboma 1 300471 Cubitus valgus with mental retardation and unusual facies 300484 Orofaciodigital syndrome VIII 300716 Mental retardation X-linked 95 300719 Deafness cataract retinitis pigmentosa and sperm abnormalities 300864 Cerebral-cerebellar-coloboma syndrome X-linked 309050 Lutheran suppressor X-linked 301067 Family with seq…	ARHGAP6|0.321783914|26.02%	1CG-001|3CG-035|3CG-042|3CG-047|3CG-064|3CG-173|8CG-004
DGC	ARHGEF6	7	100	X	q11.1|q28	300345 Microphthalmia isolated with coloboma 1 300471 Cubitus valgus with mental retardation and unusual facies 300484 Orofaciodigital syndrome VIII 300716 Mental retardation X-linked 95 300719 Deafness cataract retinitis pigmentosa and sperm abnormalities 300864 Cerebral-cerebellar-coloboma syndrome X-linked 309050 Lutheran suppressor X-linked 300010 A-11 gene 300074 X chromosome-controlling ele…	ARHGEF6|0.53421234|14.42%	1CG-001|3CG-035|3CG-042|3CG-047|3CG-064|3CG-173|8CG-004
DGC	ARHGEF9	7	100	X	q11.1|q28	300345 Microphthalmia isolated with coloboma 1 300471 Cubitus valgus with mental retardation and unusual facies 300484 Orofaciodigital syndrome VIII 300716 Mental retardation X-linked 95 300719 Deafness cataract retinitis pigmentosa and sperm abnormalities 300864 Cerebral-cerebellar-coloboma syndrome X-linked 309050 Lutheran suppressor X-linked 300010 A-11 gene 300074 X chromosome-controlling ele…	ARHGEF9|0.63673638|10.55%	1CG-001|3CG-035|3CG-042|3CG-047|3CG-064|3CG-173|8CG-004
DGC	ARHGEF9-IT1	7	100	X	q11.1|q28	300345 Microphthalmia isolated with coloboma 1 300471 Cubitus valgus with mental retardation and unusual facies 300484 Orofaciodigital syndrome VIII 300716 Mental retardation X-linked 95 300719 Deafness cataract retinitis pigmentosa and sperm abnormalities 300864 Cerebral-cerebellar-coloboma syndrome X-linked 309050 Lutheran suppressor X-linked 300010 A-11 gene 300074 X chromosome-controlling ele…	NA	1CG-001|3CG-035|3CG-042|3CG-047|3CG-064|3CG-173|8CG-004
DGC	ARL13A	7	100	X	q11.1|q28	300345 Microphthalmia isolated with coloboma 1 300471 Cubitus valgus with mental retardation and unusual facies 300484 Orofaciodigital syndrome VIII 300716 Mental retardation X-linked 95 300719 Deafness cataract retinitis pigmentosa and sperm abnormalities 300864 Cerebral-cerebellar-coloboma syndrome X-linked 309050 Lutheran suppressor X-linked 300010 A-11 gene 300074 X chromosome-controlling ele…	ARL13A|0.006011211|84.59%	1CG-001|3CG-035|3CG-042|3CG-047|3CG-064|3CG-173|8CG-004
DGC	ARMCX1	7	100	X	q11.1|q28	300345 Microphthalmia isolated with coloboma 1 300471 Cubitus valgus with mental retardation and unusual facies 300484 Orofaciodigital syndrome VIII 300716 Mental retardation X-linked 95 300719 Deafness cataract retinitis pigmentosa and sperm abnormalities 300864 Cerebral-cerebellar-coloboma syndrome X-linked 309050 Lutheran suppressor X-linked 300010 A-11 gene 300074 X chromosome-controlling ele…	ARMCX1|0.030084559|69.36%	1CG-001|3CG-035|3CG-042|3CG-047|3CG-064|3CG-173|8CG-004
DGC	ARMCX2	7	100	X	q11.1|q28	300345 Microphthalmia isolated with coloboma 1 300471 Cubitus valgus with mental retardation and unusual facies 300484 Orofaciodigital syndrome VIII 300716 Mental retardation X-linked 95 300719 Deafness cataract retinitis pigmentosa and sperm abnormalities 300864 Cerebral-cerebellar-coloboma syndrome X-linked 309050 Lutheran suppressor X-linked 300010 A-11 gene 300074 X chromosome-controlling ele…	ARMCX2|0.023937868|72.22%	1CG-001|3CG-035|3CG-042|3CG-047|3CG-064|3CG-173|8CG-004
DGC	ARMCX3	7	100	X	q11.1|q28	300345 Microphthalmia isolated with coloboma 1 300471 Cubitus valgus with mental retardation and unusual facies 300484 Orofaciodigital syndrome VIII 300716 Mental retardation X-linked 95 300719 Deafness cataract retinitis pigmentosa and sperm abnormalities 300864 Cerebral-cerebellar-coloboma syndrome X-linked 309050 Lutheran suppressor X-linked 300010 A-11 gene 300074 X chromosome-controlling ele…	ARMCX3|0.153071588|42.52%	1CG-001|3CG-035|3CG-042|3CG-047|3CG-064|3CG-173|8CG-004
DGC	ARMCX4	7	100	X	q11.1|q28	300345 Microphthalmia isolated with coloboma 1 300471 Cubitus valgus with mental retardation and unusual facies 300484 Orofaciodigital syndrome VIII 300716 Mental retardation X-linked 95 300719 Deafness cataract retinitis pigmentosa and sperm abnormalities 300864 Cerebral-cerebellar-coloboma syndrome X-linked 309050 Lutheran suppressor X-linked 300010 A-11 gene 300074 X chromosome-controlling ele…	ARMCX4|0.006015436|84.57%	1CG-001|3CG-035|3CG-042|3CG-047|3CG-064|3CG-173|8CG-004
DGC	ARMCX5	7	100	X	q11.1|q28	300345 Microphthalmia isolated with coloboma 1 300471 Cubitus valgus with mental retardation and unusual facies 300484 Orofaciodigital syndrome VIII 300716 Mental retardation X-linked 95 300719 Deafness cataract retinitis pigmentosa and sperm abnormalities 300864 Cerebral-cerebellar-coloboma syndrome X-linked 309050 Lutheran suppressor X-linked 300010 A-11 gene 300074 X chromosome-controlling ele…	ARMCX5|0.011094166|79.97%	1CG-001|3CG-035|3CG-042|3CG-047|3CG-064|3CG-173|8CG-004
DGC	ARMCX5-GPRASP2	7	100	X	q11.1|q28	300345 Microphthalmia isolated with coloboma 1 300471 Cubitus valgus with mental retardation and unusual facies 300484 Orofaciodigital syndrome VIII 300716 Mental retardation X-linked 95 300719 Deafness cataract retinitis pigmentosa and sperm abnormalities 300864 Cerebral-cerebellar-coloboma syndrome X-linked 309050 Lutheran suppressor X-linked 300010 A-11 gene 300074 X chromosome-controlling ele…	NA	1CG-001|3CG-035|3CG-042|3CG-047|3CG-064|3CG-173|8CG-004
DGC	ARMCX6	7	100	X	q11.1|q28	300345 Microphthalmia isolated with coloboma 1 300471 Cubitus valgus with mental retardation and unusual facies 300484 Orofaciodigital syndrome VIII 300716 Mental retardation X-linked 95 300719 Deafness cataract retinitis pigmentosa and sperm abnormalities 300864 Cerebral-cerebellar-coloboma syndrome X-linked 309050 Lutheran suppressor X-linked 300010 A-11 gene 300074 X chromosome-controlling ele…	ARMCX6|0.016865136|75.97%	1CG-001|3CG-035|3CG-042|3CG-047|3CG-064|3CG-173|8CG-004
DGC	ARR3	7	100	X	q11.1|q28	300345 Microphthalmia isolated with coloboma 1 300471 Cubitus valgus with mental retardation and unusual facies 300484 Orofaciodigital syndrome VIII 300716 Mental retardation X-linked 95 300719 Deafness cataract retinitis pigmentosa and sperm abnormalities 300864 Cerebral-cerebellar-coloboma syndrome X-linked 309050 Lutheran suppressor X-linked 300010 A-11 gene 300074 X chromosome-controlling ele…	ARR3|0.071510607|57.08%	1CG-001|3CG-035|3CG-042|3CG-047|3CG-064|3CG-173|8CG-004
DGC	ARSD	7	100	X	p22.33|p11.1	301780 Arylsulfatase C f form 300345 Microphthalmia isolated with coloboma 1 300471 Cubitus valgus with mental retardation and unusual facies 300484 Orofaciodigital syndrome VIII 300716 Mental retardation X-linked 95 300719 Deafness cataract retinitis pigmentosa and sperm abnormalities 300864 Cerebral-cerebellar-coloboma syndrome X-linked 309050 Lutheran suppressor X-linked 301067 Family with seq…	ARSD|0.001611053|92.29%	1CG-001|3CG-035|3CG-042|3CG-047|3CG-064|3CG-173|8CG-004
DGC	ARSD-AS1	7	100	X	p22.33|p11.1	301780 Arylsulfatase C f form 300345 Microphthalmia isolated with coloboma 1 300471 Cubitus valgus with mental retardation and unusual facies 300484 Orofaciodigital syndrome VIII 300716 Mental retardation X-linked 95 300719 Deafness cataract retinitis pigmentosa and sperm abnormalities 300864 Cerebral-cerebellar-coloboma syndrome X-linked 309050 Lutheran suppressor X-linked 301067 Family with seq…	NA	1CG-001|3CG-035|3CG-042|3CG-047|3CG-064|3CG-173|8CG-004
DGC	ARSF	7	100	X	p22.33|p11.1	301780 Arylsulfatase C f form 300345 Microphthalmia isolated with coloboma 1 300471 Cubitus valgus with mental retardation and unusual facies 300484 Orofaciodigital syndrome VIII 300716 Mental retardation X-linked 95 300719 Deafness cataract retinitis pigmentosa and sperm abnormalities 300864 Cerebral-cerebellar-coloboma syndrome X-linked 309050 Lutheran suppressor X-linked 301067 Family with seq…	ARSF|0.001220406|94.34%	1CG-001|3CG-035|3CG-042|3CG-047|3CG-064|3CG-173|8CG-004
DGC	ARSH	7	100	X	p22.33|p11.1	301780 Arylsulfatase C f form 300345 Microphthalmia isolated with coloboma 1 300471 Cubitus valgus with mental retardation and unusual facies 300484 Orofaciodigital syndrome VIII 300716 Mental retardation X-linked 95 300719 Deafness cataract retinitis pigmentosa and sperm abnormalities 300864 Cerebral-cerebellar-coloboma syndrome X-linked 309050 Lutheran suppressor X-linked 301067 Family with seq…	ARSH|0.004353843|86.54%	1CG-001|3CG-035|3CG-042|3CG-047|3CG-064|3CG-173|8CG-004
DGC	ARSL	7	100	X	p22.33|p11.1	301780 Arylsulfatase C f form 300345 Microphthalmia isolated with coloboma 1 300471 Cubitus valgus with mental retardation and unusual facies 300484 Orofaciodigital syndrome VIII 300716 Mental retardation X-linked 95 300719 Deafness cataract retinitis pigmentosa and sperm abnormalities 300864 Cerebral-cerebellar-coloboma syndrome X-linked 309050 Lutheran suppressor X-linked 301067 Family with seq…	NA	1CG-001|3CG-035|3CG-042|3CG-047|3CG-064|3CG-173|8CG-004
DGC	ARX	7	100	X	p22.33|p11.1	301780 Arylsulfatase C f form 300345 Microphthalmia isolated with coloboma 1 300471 Cubitus valgus with mental retardation and unusual facies 300484 Orofaciodigital syndrome VIII 300716 Mental retardation X-linked 95 300719 Deafness cataract retinitis pigmentosa and sperm abnormalities 300864 Cerebral-cerebellar-coloboma syndrome X-linked 309050 Lutheran suppressor X-linked 301067 Family with seq…	ARX|0.40885363|20.25%	1CG-001|3CG-035|3CG-042|3CG-047|3CG-064|3CG-173|8CG-004
DGC	ASB11	7	100	X	p22.33|p11.1	301780 Arylsulfatase C f form 300345 Microphthalmia isolated with coloboma 1 300471 Cubitus valgus with mental retardation and unusual facies 300484 Orofaciodigital syndrome VIII 300716 Mental retardation X-linked 95 300719 Deafness cataract retinitis pigmentosa and sperm abnormalities 300864 Cerebral-cerebellar-coloboma syndrome X-linked 309050 Lutheran suppressor X-linked 301067 Family with seq…	ASB11|0.151540693|42.75%	1CG-001|3CG-035|3CG-042|3CG-047|3CG-064|3CG-173|8CG-004
DGC	ASB12	7	100	X	q11.1|q28	300345 Microphthalmia isolated with coloboma 1 300471 Cubitus valgus with mental retardation and unusual facies 300484 Orofaciodigital syndrome VIII 300716 Mental retardation X-linked 95 300719 Deafness cataract retinitis pigmentosa and sperm abnormalities 300864 Cerebral-cerebellar-coloboma syndrome X-linked 309050 Lutheran suppressor X-linked 300010 A-11 gene 300074 X chromosome-controlling ele…	ASB12|0.05455441|61.32%	1CG-001|3CG-035|3CG-042|3CG-047|3CG-064|3CG-173|8CG-004
DGC	ASB9	7	100	X	p22.33|p11.1	301780 Arylsulfatase C f form 300345 Microphthalmia isolated with coloboma 1 300471 Cubitus valgus with mental retardation and unusual facies 300484 Orofaciodigital syndrome VIII 300716 Mental retardation X-linked 95 300719 Deafness cataract retinitis pigmentosa and sperm abnormalities 300864 Cerebral-cerebellar-coloboma syndrome X-linked 309050 Lutheran suppressor X-linked 301067 Family with seq…	ASB9|0.016723091|76.06%	1CG-001|3CG-035|3CG-042|3CG-047|3CG-064|3CG-173|8CG-004
DGC	ATG4A	7	100	X	q11.1|q28	300345 Microphthalmia isolated with coloboma 1 300471 Cubitus valgus with mental retardation and unusual facies 300484 Orofaciodigital syndrome VIII 300716 Mental retardation X-linked 95 300719 Deafness cataract retinitis pigmentosa and sperm abnormalities 300864 Cerebral-cerebellar-coloboma syndrome X-linked 309050 Lutheran suppressor X-linked 300010 A-11 gene 300074 X chromosome-controlling ele…	ATG4A|0.459815165|17.69%	1CG-001|3CG-035|3CG-042|3CG-047|3CG-064|3CG-173|8CG-004
DGC	ATP11C	7	100	X	q11.1|q28	300345 Microphthalmia isolated with coloboma 1 300471 Cubitus valgus with mental retardation and unusual facies 300484 Orofaciodigital syndrome VIII 300716 Mental retardation X-linked 95 300719 Deafness cataract retinitis pigmentosa and sperm abnormalities 300864 Cerebral-cerebellar-coloboma syndrome X-linked 309050 Lutheran suppressor X-linked 300010 A-11 gene 300074 X chromosome-controlling ele…	ATP11C|0.389494809|21.44%	1CG-001|3CG-035|3CG-042|3CG-047|3CG-064|3CG-173|8CG-004
DGC	ATP1B4	7	100	X	q11.1|q28	300345 Microphthalmia isolated with coloboma 1 300471 Cubitus valgus with mental retardation and unusual facies 300484 Orofaciodigital syndrome VIII 300716 Mental retardation X-linked 95 300719 Deafness cataract retinitis pigmentosa and sperm abnormalities 300864 Cerebral-cerebellar-coloboma syndrome X-linked 309050 Lutheran suppressor X-linked 300010 A-11 gene 300074 X chromosome-controlling ele…	ATP1B4|0.360784799|23.39%	1CG-001|3CG-035|3CG-042|3CG-047|3CG-064|3CG-173|8CG-004
DGC	ATP2B3	7	100	X	q11.1|q28	300345 Microphthalmia isolated with coloboma 1 300471 Cubitus valgus with mental retardation and unusual facies 300484 Orofaciodigital syndrome VIII 300716 Mental retardation X-linked 95 300719 Deafness cataract retinitis pigmentosa and sperm abnormalities 300864 Cerebral-cerebellar-coloboma syndrome X-linked 309050 Lutheran suppressor X-linked 300010 A-11 gene 300074 X chromosome-controlling ele…	ATP2B3|0.203946244|36.25%	1CG-001|3CG-035|3CG-042|3CG-047|3CG-064|3CG-173|8CG-004
DGC	ATP6AP1	7	100	X	q11.1|q28	300345 Microphthalmia isolated with coloboma 1 300471 Cubitus valgus with mental retardation and unusual facies 300484 Orofaciodigital syndrome VIII 300716 Mental retardation X-linked 95 300719 Deafness cataract retinitis pigmentosa and sperm abnormalities 300864 Cerebral-cerebellar-coloboma syndrome X-linked 309050 Lutheran suppressor X-linked 300010 A-11 gene 300074 X chromosome-controlling ele…	ATP6AP1|0.067534855|57.98%	1CG-001|3CG-035|3CG-042|3CG-047|3CG-064|3CG-173|8CG-004
DGC	ATP6AP2	7	100	X	p22.33|p11.1	301780 Arylsulfatase C f form 300345 Microphthalmia isolated with coloboma 1 300471 Cubitus valgus with mental retardation and unusual facies 300484 Orofaciodigital syndrome VIII 300716 Mental retardation X-linked 95 300719 Deafness cataract retinitis pigmentosa and sperm abnormalities 300864 Cerebral-cerebellar-coloboma syndrome X-linked 309050 Lutheran suppressor X-linked 301067 Family with seq…	ATP6AP2|0.213725409|35.15%	1CG-001|3CG-035|3CG-042|3CG-047|3CG-064|3CG-173|8CG-004
DGC	ATP7A	7	100	X	q11.1|q28	300345 Microphthalmia isolated with coloboma 1 300471 Cubitus valgus with mental retardation and unusual facies 300484 Orofaciodigital syndrome VIII 300716 Mental retardation X-linked 95 300719 Deafness cataract retinitis pigmentosa and sperm abnormalities 300864 Cerebral-cerebellar-coloboma syndrome X-linked 309050 Lutheran suppressor X-linked 300010 A-11 gene 300074 X chromosome-controlling ele…	ATP7A|0.267298986|30.07%	1CG-001|3CG-035|3CG-042|3CG-047|3CG-064|3CG-173|8CG-004
DGC	ATRX	7	100	X	q11.1|q28	300345 Microphthalmia isolated with coloboma 1 300471 Cubitus valgus with mental retardation and unusual facies 300484 Orofaciodigital syndrome VIII 300716 Mental retardation X-linked 95 300719 Deafness cataract retinitis pigmentosa and sperm abnormalities 300864 Cerebral-cerebellar-coloboma syndrome X-linked 309050 Lutheran suppressor X-linked 300010 A-11 gene 300074 X chromosome-controlling ele…	ATRX|0.768191445|6.65%	1CG-001|3CG-035|3CG-042|3CG-047|3CG-064|3CG-173|8CG-004
DGC	ATXN3L	7	100	X	p22.33|p11.1	301780 Arylsulfatase C f form 300345 Microphthalmia isolated with coloboma 1 300471 Cubitus valgus with mental retardation and unusual facies 300484 Orofaciodigital syndrome VIII 300716 Mental retardation X-linked 95 300719 Deafness cataract retinitis pigmentosa and sperm abnormalities 300864 Cerebral-cerebellar-coloboma syndrome X-linked 309050 Lutheran suppressor X-linked 301067 Family with seq…	ATXN3L|0.001386148|93.42%	1CG-001|3CG-035|3CG-042|3CG-047|3CG-064|3CG-173|8CG-004
DGC	AVPR2	7	100	X	q11.1|q28	300345 Microphthalmia isolated with coloboma 1 300471 Cubitus valgus with mental retardation and unusual facies 300484 Orofaciodigital syndrome VIII 300716 Mental retardation X-linked 95 300719 Deafness cataract retinitis pigmentosa and sperm abnormalities 300864 Cerebral-cerebellar-coloboma syndrome X-linked 309050 Lutheran suppressor X-linked 300010 A-11 gene 300074 X chromosome-controlling ele…	AVPR2|0.577522936|12.7%	1CG-001|3CG-035|3CG-042|3CG-047|3CG-064|3CG-173|8CG-004
DGC	AWAT1	7	100	X	q11.1|q28	300345 Microphthalmia isolated with coloboma 1 300471 Cubitus valgus with mental retardation and unusual facies 300484 Orofaciodigital syndrome VIII 300716 Mental retardation X-linked 95 300719 Deafness cataract retinitis pigmentosa and sperm abnormalities 300864 Cerebral-cerebellar-coloboma syndrome X-linked 309050 Lutheran suppressor X-linked 300010 A-11 gene 300074 X chromosome-controlling ele…	AWAT1|0.058783311|60.2%	1CG-001|3CG-035|3CG-042|3CG-047|3CG-064|3CG-173|8CG-004
DGC	AWAT2	7	100	X	q11.1|q28	300345 Microphthalmia isolated with coloboma 1 300471 Cubitus valgus with mental retardation and unusual facies 300484 Orofaciodigital syndrome VIII 300716 Mental retardation X-linked 95 300719 Deafness cataract retinitis pigmentosa and sperm abnormalities 300864 Cerebral-cerebellar-coloboma syndrome X-linked 309050 Lutheran suppressor X-linked 300010 A-11 gene 300074 X chromosome-controlling ele…	AWAT2|0.053392976|61.67%	1CG-001|3CG-035|3CG-042|3CG-047|3CG-064|3CG-173|8CG-004
DGC	BCAP31	7	100	X	q11.1|q28	300345 Microphthalmia isolated with coloboma 1 300471 Cubitus valgus with mental retardation and unusual facies 300484 Orofaciodigital syndrome VIII 300716 Mental retardation X-linked 95 300719 Deafness cataract retinitis pigmentosa and sperm abnormalities 300864 Cerebral-cerebellar-coloboma syndrome X-linked 309050 Lutheran suppressor X-linked 300010 A-11 gene 300074 X chromosome-controlling ele…	BCAP31|0.246665785|31.87%	1CG-001|3CG-035|3CG-042|3CG-047|3CG-064|3CG-173|8CG-004
DGC	BCLAF3	7	100	X	p22.33|p11.1	301780 Arylsulfatase C f form 300345 Microphthalmia isolated with coloboma 1 300471 Cubitus valgus with mental retardation and unusual facies 300484 Orofaciodigital syndrome VIII 300716 Mental retardation X-linked 95 300719 Deafness cataract retinitis pigmentosa and sperm abnormalities 300864 Cerebral-cerebellar-coloboma syndrome X-linked 309050 Lutheran suppressor X-linked 301067 Family with seq…	NA	1CG-001|3CG-035|3CG-042|3CG-047|3CG-064|3CG-173|8CG-004
DGC	BCOR	7	100	X	p22.33|p11.1	301780 Arylsulfatase C f form 300345 Microphthalmia isolated with coloboma 1 300471 Cubitus valgus with mental retardation and unusual facies 300484 Orofaciodigital syndrome VIII 300716 Mental retardation X-linked 95 300719 Deafness cataract retinitis pigmentosa and sperm abnormalities 300864 Cerebral-cerebellar-coloboma syndrome X-linked 309050 Lutheran suppressor X-linked 301067 Family with seq…	BCOR|0.481414102|16.71%	1CG-001|3CG-035|3CG-042|3CG-047|3CG-064|3CG-173|8CG-004
DGC	BCORL1	7	100	X	q11.1|q28	300345 Microphthalmia isolated with coloboma 1 300471 Cubitus valgus with mental retardation and unusual facies 300484 Orofaciodigital syndrome VIII 300716 Mental retardation X-linked 95 300719 Deafness cataract retinitis pigmentosa and sperm abnormalities 300864 Cerebral-cerebellar-coloboma syndrome X-linked 309050 Lutheran suppressor X-linked 300010 A-11 gene 300074 X chromosome-controlling ele…	BCORL1|0.202266088|36.48%	1CG-001|3CG-035|3CG-042|3CG-047|3CG-064|3CG-173|8CG-004
DGC	BEND2	7	100	X	p22.33|p11.1	301780 Arylsulfatase C f form 300345 Microphthalmia isolated with coloboma 1 300471 Cubitus valgus with mental retardation and unusual facies 300484 Orofaciodigital syndrome VIII 300716 Mental retardation X-linked 95 300719 Deafness cataract retinitis pigmentosa and sperm abnormalities 300864 Cerebral-cerebellar-coloboma syndrome X-linked 309050 Lutheran suppressor X-linked 301067 Family with seq…	BEND2|0.00046264|98.62%	1CG-001|3CG-035|3CG-042|3CG-047|3CG-064|3CG-173|8CG-004
DGC	BEX1	7	100	X	q11.1|q28	300345 Microphthalmia isolated with coloboma 1 300471 Cubitus valgus with mental retardation and unusual facies 300484 Orofaciodigital syndrome VIII 300716 Mental retardation X-linked 95 300719 Deafness cataract retinitis pigmentosa and sperm abnormalities 300864 Cerebral-cerebellar-coloboma syndrome X-linked 309050 Lutheran suppressor X-linked 300010 A-11 gene 300074 X chromosome-controlling ele…	BEX1|0.012585528|78.82%	1CG-001|3CG-035|3CG-042|3CG-047|3CG-064|3CG-173|8CG-004
DGC	BEX2	7	100	X	q11.1|q28	300345 Microphthalmia isolated with coloboma 1 300471 Cubitus valgus with mental retardation and unusual facies 300484 Orofaciodigital syndrome VIII 300716 Mental retardation X-linked 95 300719 Deafness cataract retinitis pigmentosa and sperm abnormalities 300864 Cerebral-cerebellar-coloboma syndrome X-linked 309050 Lutheran suppressor X-linked 300010 A-11 gene 300074 X chromosome-controlling ele…	BEX2|0.018970374|74.68%	1CG-001|3CG-035|3CG-042|3CG-047|3CG-064|3CG-173|8CG-004
DGC	BEX3	7	100	X	q11.1|q28	300345 Microphthalmia isolated with coloboma 1 300471 Cubitus valgus with mental retardation and unusual facies 300484 Orofaciodigital syndrome VIII 300716 Mental retardation X-linked 95 300719 Deafness cataract retinitis pigmentosa and sperm abnormalities 300864 Cerebral-cerebellar-coloboma syndrome X-linked 309050 Lutheran suppressor X-linked 300010 A-11 gene 300074 X chromosome-controlling ele…	NA	1CG-001|3CG-035|3CG-042|3CG-047|3CG-064|3CG-173|8CG-004
DGC	BEX4	7	100	X	q11.1|q28	300345 Microphthalmia isolated with coloboma 1 300471 Cubitus valgus with mental retardation and unusual facies 300484 Orofaciodigital syndrome VIII 300716 Mental retardation X-linked 95 300719 Deafness cataract retinitis pigmentosa and sperm abnormalities 300864 Cerebral-cerebellar-coloboma syndrome X-linked 309050 Lutheran suppressor X-linked 300010 A-11 gene 300074 X chromosome-controlling ele…	BEX4|0.007503312|83.06%	1CG-001|3CG-035|3CG-042|3CG-047|3CG-064|3CG-173|8CG-004
DGC	BEX5	7	100	X	q11.1|q28	300345 Microphthalmia isolated with coloboma 1 300471 Cubitus valgus with mental retardation and unusual facies 300484 Orofaciodigital syndrome VIII 300716 Mental retardation X-linked 95 300719 Deafness cataract retinitis pigmentosa and sperm abnormalities 300864 Cerebral-cerebellar-coloboma syndrome X-linked 309050 Lutheran suppressor X-linked 300010 A-11 gene 300074 X chromosome-controlling ele…	BEX5|0.026549592|71.1%	1CG-001|3CG-035|3CG-042|3CG-047|3CG-064|3CG-173|8CG-004
DGC	BGN	7	100	X	q11.1|q28	300345 Microphthalmia isolated with coloboma 1 300471 Cubitus valgus with mental retardation and unusual facies 300484 Orofaciodigital syndrome VIII 300716 Mental retardation X-linked 95 300719 Deafness cataract retinitis pigmentosa and sperm abnormalities 300864 Cerebral-cerebellar-coloboma syndrome X-linked 309050 Lutheran suppressor X-linked 300010 A-11 gene 300074 X chromosome-controlling ele…	BGN|0.555214937|13.51%	1CG-001|3CG-035|3CG-042|3CG-047|3CG-064|3CG-173|8CG-004
DGC	BHLHB9	7	100	X	q11.1|q28	300345 Microphthalmia isolated with coloboma 1 300471 Cubitus valgus with mental retardation and unusual facies 300484 Orofaciodigital syndrome VIII 300716 Mental retardation X-linked 95 300719 Deafness cataract retinitis pigmentosa and sperm abnormalities 300864 Cerebral-cerebellar-coloboma syndrome X-linked 309050 Lutheran suppressor X-linked 300010 A-11 gene 300074 X chromosome-controlling ele…	BHLHB9|0.028265126|70.32%	1CG-001|3CG-035|3CG-042|3CG-047|3CG-064|3CG-173|8CG-004
DGC	BMP15	7	100	X	p22.33|p11.1	301780 Arylsulfatase C f form 300345 Microphthalmia isolated with coloboma 1 300471 Cubitus valgus with mental retardation and unusual facies 300484 Orofaciodigital syndrome VIII 300716 Mental retardation X-linked 95 300719 Deafness cataract retinitis pigmentosa and sperm abnormalities 300864 Cerebral-cerebellar-coloboma syndrome X-linked 309050 Lutheran suppressor X-linked 301067 Family with seq…	BMP15|0.067189507|58.11%	1CG-001|3CG-035|3CG-042|3CG-047|3CG-064|3CG-173|8CG-004
DGC	BMX	7	100	X	p22.33|p11.1	301780 Arylsulfatase C f form 300345 Microphthalmia isolated with coloboma 1 300471 Cubitus valgus with mental retardation and unusual facies 300484 Orofaciodigital syndrome VIII 300716 Mental retardation X-linked 95 300719 Deafness cataract retinitis pigmentosa and sperm abnormalities 300864 Cerebral-cerebellar-coloboma syndrome X-linked 309050 Lutheran suppressor X-linked 301067 Family with seq…	BMX|0.225809217|33.78%	1CG-001|3CG-035|3CG-042|3CG-047|3CG-064|3CG-173|8CG-004
DGC	BRCC3	7	100	X	q11.1|q28	300345 Microphthalmia isolated with coloboma 1 300471 Cubitus valgus with mental retardation and unusual facies 300484 Orofaciodigital syndrome VIII 300716 Mental retardation X-linked 95 300719 Deafness cataract retinitis pigmentosa and sperm abnormalities 300864 Cerebral-cerebellar-coloboma syndrome X-linked 309050 Lutheran suppressor X-linked 300010 A-11 gene 300074 X chromosome-controlling ele…	BRCC3|0.276622431|29.41%	1CG-001|3CG-035|3CG-042|3CG-047|3CG-064|3CG-173|8CG-004
DGC	BRDTP1	7	100	X	q11.1|q28	300345 Microphthalmia isolated with coloboma 1 300471 Cubitus valgus with mental retardation and unusual facies 300484 Orofaciodigital syndrome VIII 300716 Mental retardation X-linked 95 300719 Deafness cataract retinitis pigmentosa and sperm abnormalities 300864 Cerebral-cerebellar-coloboma syndrome X-linked 309050 Lutheran suppressor X-linked 300010 A-11 gene 300074 X chromosome-controlling ele…	NA	1CG-001|3CG-035|3CG-042|3CG-047|3CG-064|3CG-173|8CG-004
DGC	BRS3	7	100	X	q11.1|q28	300345 Microphthalmia isolated with coloboma 1 300471 Cubitus valgus with mental retardation and unusual facies 300484 Orofaciodigital syndrome VIII 300716 Mental retardation X-linked 95 300719 Deafness cataract retinitis pigmentosa and sperm abnormalities 300864 Cerebral-cerebellar-coloboma syndrome X-linked 309050 Lutheran suppressor X-linked 300010 A-11 gene 300074 X chromosome-controlling ele…	BRS3|0.215732205|34.92%	1CG-001|3CG-035|3CG-042|3CG-047|3CG-064|3CG-173|8CG-004
DGC	BRWD3	7	100	X	q11.1|q28	300345 Microphthalmia isolated with coloboma 1 300471 Cubitus valgus with mental retardation and unusual facies 300484 Orofaciodigital syndrome VIII 300716 Mental retardation X-linked 95 300719 Deafness cataract retinitis pigmentosa and sperm abnormalities 300864 Cerebral-cerebellar-coloboma syndrome X-linked 309050 Lutheran suppressor X-linked 300010 A-11 gene 300074 X chromosome-controlling ele…	BRWD3|0.286279937|28.63%	1CG-001|3CG-035|3CG-042|3CG-047|3CG-064|3CG-173|8CG-004
DGC	BTK	7	100	X	q11.1|q28	300345 Microphthalmia isolated with coloboma 1 300471 Cubitus valgus with mental retardation and unusual facies 300484 Orofaciodigital syndrome VIII 300716 Mental retardation X-linked 95 300719 Deafness cataract retinitis pigmentosa and sperm abnormalities 300864 Cerebral-cerebellar-coloboma syndrome X-linked 309050 Lutheran suppressor X-linked 300010 A-11 gene 300074 X chromosome-controlling ele…	BTK|0.867331978|4.3%	1CG-001|3CG-035|3CG-042|3CG-047|3CG-064|3CG-173|8CG-004
DGC	C1GALT1C1	7	100	X	q11.1|q28	300345 Microphthalmia isolated with coloboma 1 300471 Cubitus valgus with mental retardation and unusual facies 300484 Orofaciodigital syndrome VIII 300716 Mental retardation X-linked 95 300719 Deafness cataract retinitis pigmentosa and sperm abnormalities 300864 Cerebral-cerebellar-coloboma syndrome X-linked 309050 Lutheran suppressor X-linked 300010 A-11 gene 300074 X chromosome-controlling ele…	C1GALT1C1|0.400695181|20.72%	1CG-001|3CG-035|3CG-042|3CG-047|3CG-064|3CG-173|8CG-004
DGC	CA5B	7	100	X	p22.33|p11.1	301780 Arylsulfatase C f form 300345 Microphthalmia isolated with coloboma 1 300471 Cubitus valgus with mental retardation and unusual facies 300484 Orofaciodigital syndrome VIII 300716 Mental retardation X-linked 95 300719 Deafness cataract retinitis pigmentosa and sperm abnormalities 300864 Cerebral-cerebellar-coloboma syndrome X-linked 309050 Lutheran suppressor X-linked 301067 Family with seq…	CA5B|0.115811341|48.17%	1CG-001|3CG-035|3CG-042|3CG-047|3CG-064|3CG-173|8CG-004
DGC	CA5BP1	7	100	X	p22.33|p11.1	301780 Arylsulfatase C f form 300345 Microphthalmia isolated with coloboma 1 300471 Cubitus valgus with mental retardation and unusual facies 300484 Orofaciodigital syndrome VIII 300716 Mental retardation X-linked 95 300719 Deafness cataract retinitis pigmentosa and sperm abnormalities 300864 Cerebral-cerebellar-coloboma syndrome X-linked 309050 Lutheran suppressor X-linked 301067 Family with seq…	NA	1CG-001|3CG-035|3CG-042|3CG-047|3CG-064|3CG-173|8CG-004
DGC	CA5BP1-CA5B	7	100	X	p22.33|p11.1	301780 Arylsulfatase C f form 300345 Microphthalmia isolated with coloboma 1 300471 Cubitus valgus with mental retardation and unusual facies 300484 Orofaciodigital syndrome VIII 300716 Mental retardation X-linked 95 300719 Deafness cataract retinitis pigmentosa and sperm abnormalities 300864 Cerebral-cerebellar-coloboma syndrome X-linked 309050 Lutheran suppressor X-linked 301067 Family with seq…	NA	1CG-001|3CG-035|3CG-042|3CG-047|3CG-064|3CG-173|8CG-004
DGC	CACNA1F	7	100	X	p22.33|p11.1	301780 Arylsulfatase C f form 300345 Microphthalmia isolated with coloboma 1 300471 Cubitus valgus with mental retardation and unusual facies 300484 Orofaciodigital syndrome VIII 300716 Mental retardation X-linked 95 300719 Deafness cataract retinitis pigmentosa and sperm abnormalities 300864 Cerebral-cerebellar-coloboma syndrome X-linked 309050 Lutheran suppressor X-linked 301067 Family with seq…	CACNA1F|0.172930076|39.96%	1CG-001|3CG-035|3CG-042|3CG-047|3CG-064|3CG-173|8CG-004
DGC	CAPN6	7	100	X	q11.1|q28	300345 Microphthalmia isolated with coloboma 1 300471 Cubitus valgus with mental retardation and unusual facies 300484 Orofaciodigital syndrome VIII 300716 Mental retardation X-linked 95 300719 Deafness cataract retinitis pigmentosa and sperm abnormalities 300864 Cerebral-cerebellar-coloboma syndrome X-linked 309050 Lutheran suppressor X-linked 300010 A-11 gene 300074 X chromosome-controlling ele…	CAPN6|0.398354771|20.87%	1CG-001|3CG-035|3CG-042|3CG-047|3CG-064|3CG-173|8CG-004
DGC	CASK	7	100	X	p22.33|p11.1	301780 Arylsulfatase C f form 300345 Microphthalmia isolated with coloboma 1 300471 Cubitus valgus with mental retardation and unusual facies 300484 Orofaciodigital syndrome VIII 300716 Mental retardation X-linked 95 300719 Deafness cataract retinitis pigmentosa and sperm abnormalities 300864 Cerebral-cerebellar-coloboma syndrome X-linked 309050 Lutheran suppressor X-linked 301067 Family with seq…	CASK|0.916357249|3.08%	1CG-001|3CG-035|3CG-042|3CG-047|3CG-064|3CG-173|8CG-004
DGC	CBLL2	7	100	X	p22.33|p11.1	301780 Arylsulfatase C f form 300345 Microphthalmia isolated with coloboma 1 300471 Cubitus valgus with mental retardation and unusual facies 300484 Orofaciodigital syndrome VIII 300716 Mental retardation X-linked 95 300719 Deafness cataract retinitis pigmentosa and sperm abnormalities 300864 Cerebral-cerebellar-coloboma syndrome X-linked 309050 Lutheran suppressor X-linked 301067 Family with seq…	NA	1CG-001|3CG-035|3CG-042|3CG-047|3CG-064|3CG-173|8CG-004
DGC	CCDC120	7	100	X	p22.33|p11.1	301780 Arylsulfatase C f form 300345 Microphthalmia isolated with coloboma 1 300471 Cubitus valgus with mental retardation and unusual facies 300484 Orofaciodigital syndrome VIII 300716 Mental retardation X-linked 95 300719 Deafness cataract retinitis pigmentosa and sperm abnormalities 300864 Cerebral-cerebellar-coloboma syndrome X-linked 309050 Lutheran suppressor X-linked 301067 Family with seq…	CCDC120|0.076585816|55.98%	1CG-001|3CG-035|3CG-042|3CG-047|3CG-064|3CG-173|8CG-004
DGC	CCDC160	7	100	X	q11.1|q28	300345 Microphthalmia isolated with coloboma 1 300471 Cubitus valgus with mental retardation and unusual facies 300484 Orofaciodigital syndrome VIII 300716 Mental retardation X-linked 95 300719 Deafness cataract retinitis pigmentosa and sperm abnormalities 300864 Cerebral-cerebellar-coloboma syndrome X-linked 309050 Lutheran suppressor X-linked 300010 A-11 gene 300074 X chromosome-controlling ele…	CCDC160|0.006302974|84.27%	1CG-001|3CG-035|3CG-042|3CG-047|3CG-064|3CG-173|8CG-004
DGC	CCDC22	7	100	X	p22.33|p11.1	301780 Arylsulfatase C f form 300345 Microphthalmia isolated with coloboma 1 300471 Cubitus valgus with mental retardation and unusual facies 300484 Orofaciodigital syndrome VIII 300716 Mental retardation X-linked 95 300719 Deafness cataract retinitis pigmentosa and sperm abnormalities 300864 Cerebral-cerebellar-coloboma syndrome X-linked 309050 Lutheran suppressor X-linked 301067 Family with seq…	CCDC22|0.132061966|45.6%	1CG-001|3CG-035|3CG-042|3CG-047|3CG-064|3CG-173|8CG-004
DGC	CCNB3	7	100	X	p22.33|p11.1	301780 Arylsulfatase C f form 300345 Microphthalmia isolated with coloboma 1 300471 Cubitus valgus with mental retardation and unusual facies 300484 Orofaciodigital syndrome VIII 300716 Mental retardation X-linked 95 300719 Deafness cataract retinitis pigmentosa and sperm abnormalities 300864 Cerebral-cerebellar-coloboma syndrome X-linked 309050 Lutheran suppressor X-linked 301067 Family with seq…	CCNB3|0.006825021|83.65%	1CG-001|3CG-035|3CG-042|3CG-047|3CG-064|3CG-173|8CG-004
DGC	CCNQ	7	100	X	q11.1|q28	300345 Microphthalmia isolated with coloboma 1 300471 Cubitus valgus with mental retardation and unusual facies 300484 Orofaciodigital syndrome VIII 300716 Mental retardation X-linked 95 300719 Deafness cataract retinitis pigmentosa and sperm abnormalities 300864 Cerebral-cerebellar-coloboma syndrome X-linked 309050 Lutheran suppressor X-linked 300010 A-11 gene 300074 X chromosome-controlling ele…	NA	1CG-001|3CG-035|3CG-042|3CG-047|3CG-064|3CG-173|8CG-004
DGC	CD40LG	7	100	X	q11.1|q28	300345 Microphthalmia isolated with coloboma 1 300471 Cubitus valgus with mental retardation and unusual facies 300484 Orofaciodigital syndrome VIII 300716 Mental retardation X-linked 95 300719 Deafness cataract retinitis pigmentosa and sperm abnormalities 300864 Cerebral-cerebellar-coloboma syndrome X-linked 309050 Lutheran suppressor X-linked 300010 A-11 gene 300074 X chromosome-controlling ele…	CD40LG|0.703733653|8.39%	1CG-001|3CG-035|3CG-042|3CG-047|3CG-064|3CG-173|8CG-004
DGC	CD99L2	7	100	X	q11.1|q28	300345 Microphthalmia isolated with coloboma 1 300471 Cubitus valgus with mental retardation and unusual facies 300484 Orofaciodigital syndrome VIII 300716 Mental retardation X-linked 95 300719 Deafness cataract retinitis pigmentosa and sperm abnormalities 300864 Cerebral-cerebellar-coloboma syndrome X-linked 309050 Lutheran suppressor X-linked 300010 A-11 gene 300074 X chromosome-controlling ele…	CD99L2|0.00823782|82.42%	1CG-001|3CG-035|3CG-042|3CG-047|3CG-064|3CG-173|8CG-004
DGC	CDK16	7	100	X	p22.33|p11.1	301780 Arylsulfatase C f form 300345 Microphthalmia isolated with coloboma 1 300471 Cubitus valgus with mental retardation and unusual facies 300484 Orofaciodigital syndrome VIII 300716 Mental retardation X-linked 95 300719 Deafness cataract retinitis pigmentosa and sperm abnormalities 300864 Cerebral-cerebellar-coloboma syndrome X-linked 309050 Lutheran suppressor X-linked 301067 Family with seq…	CDK16|0.943576354|2.39%	1CG-001|3CG-035|3CG-042|3CG-047|3CG-064|3CG-173|8CG-004
DGC	CDKL5	7	100	X	p22.33|p11.1	301780 Arylsulfatase C f form 300345 Microphthalmia isolated with coloboma 1 300471 Cubitus valgus with mental retardation and unusual facies 300484 Orofaciodigital syndrome VIII 300716 Mental retardation X-linked 95 300719 Deafness cataract retinitis pigmentosa and sperm abnormalities 300864 Cerebral-cerebellar-coloboma syndrome X-linked 309050 Lutheran suppressor X-linked 301067 Family with seq…	CDKL5|0.564369159|13.18%	1CG-001|3CG-035|3CG-042|3CG-047|3CG-064|3CG-173|8CG-004
DGC	CDR1	7	100	X	q11.1|q28	300345 Microphthalmia isolated with coloboma 1 300471 Cubitus valgus with mental retardation and unusual facies 300484 Orofaciodigital syndrome VIII 300716 Mental retardation X-linked 95 300719 Deafness cataract retinitis pigmentosa and sperm abnormalities 300864 Cerebral-cerebellar-coloboma syndrome X-linked 309050 Lutheran suppressor X-linked 300010 A-11 gene 300074 X chromosome-controlling ele…	CDR1|0.000593381|97.97%	1CG-001|3CG-035|3CG-042|3CG-047|3CG-064|3CG-173|8CG-004
DGC	CDX4	7	100	X	q11.1|q28	300345 Microphthalmia isolated with coloboma 1 300471 Cubitus valgus with mental retardation and unusual facies 300484 Orofaciodigital syndrome VIII 300716 Mental retardation X-linked 95 300719 Deafness cataract retinitis pigmentosa and sperm abnormalities 300864 Cerebral-cerebellar-coloboma syndrome X-linked 309050 Lutheran suppressor X-linked 300010 A-11 gene 300074 X chromosome-controlling ele…	CDX4|0.034057905|67.76%	1CG-001|3CG-035|3CG-042|3CG-047|3CG-064|3CG-173|8CG-004
DGC	CENPI	7	100	X	q11.1|q28	300345 Microphthalmia isolated with coloboma 1 300471 Cubitus valgus with mental retardation and unusual facies 300484 Orofaciodigital syndrome VIII 300716 Mental retardation X-linked 95 300719 Deafness cataract retinitis pigmentosa and sperm abnormalities 300864 Cerebral-cerebellar-coloboma syndrome X-linked 309050 Lutheran suppressor X-linked 300010 A-11 gene 300074 X chromosome-controlling ele…	CENPI|0.118322957|47.69%	1CG-001|3CG-035|3CG-042|3CG-047|3CG-064|3CG-173|8CG-004
DGC	CENPVL1	7	100	X	p22.33|p11.1	301780 Arylsulfatase C f form 300345 Microphthalmia isolated with coloboma 1 300471 Cubitus valgus with mental retardation and unusual facies 300484 Orofaciodigital syndrome VIII 300716 Mental retardation X-linked 95 300719 Deafness cataract retinitis pigmentosa and sperm abnormalities 300864 Cerebral-cerebellar-coloboma syndrome X-linked 309050 Lutheran suppressor X-linked 301067 Family with seq…	NA	1CG-001|3CG-035|3CG-042|3CG-047|3CG-064|3CG-173|8CG-004
DGC	CENPVL2	7	100	X	p22.33|p11.1	301780 Arylsulfatase C f form 300345 Microphthalmia isolated with coloboma 1 300471 Cubitus valgus with mental retardation and unusual facies 300484 Orofaciodigital syndrome VIII 300716 Mental retardation X-linked 95 300719 Deafness cataract retinitis pigmentosa and sperm abnormalities 300864 Cerebral-cerebellar-coloboma syndrome X-linked 309050 Lutheran suppressor X-linked 301067 Family with seq…	NA	1CG-001|3CG-035|3CG-042|3CG-047|3CG-064|3CG-173|8CG-004
DGC	CENPVL3	7	100	X	p22.33|p11.1	301780 Arylsulfatase C f form 300345 Microphthalmia isolated with coloboma 1 300471 Cubitus valgus with mental retardation and unusual facies 300484 Orofaciodigital syndrome VIII 300716 Mental retardation X-linked 95 300719 Deafness cataract retinitis pigmentosa and sperm abnormalities 300864 Cerebral-cerebellar-coloboma syndrome X-linked 309050 Lutheran suppressor X-linked 301067 Family with seq…	NA	1CG-001|3CG-035|3CG-042|3CG-047|3CG-064|3CG-173|8CG-004
DGC	CETN2	7	100	X	q11.1|q28	300345 Microphthalmia isolated with coloboma 1 300471 Cubitus valgus with mental retardation and unusual facies 300484 Orofaciodigital syndrome VIII 300716 Mental retardation X-linked 95 300719 Deafness cataract retinitis pigmentosa and sperm abnormalities 300864 Cerebral-cerebellar-coloboma syndrome X-linked 309050 Lutheran suppressor X-linked 300010 A-11 gene 300074 X chromosome-controlling ele…	CETN2|0.395050068|21.07%	1CG-001|3CG-035|3CG-042|3CG-047|3CG-064|3CG-173|8CG-004
DGC	CFAP47	7	100	X	p22.33|p11.1	301780 Arylsulfatase C f form 300345 Microphthalmia isolated with coloboma 1 300471 Cubitus valgus with mental retardation and unusual facies 300484 Orofaciodigital syndrome VIII 300716 Mental retardation X-linked 95 300719 Deafness cataract retinitis pigmentosa and sperm abnormalities 300864 Cerebral-cerebellar-coloboma syndrome X-linked 309050 Lutheran suppressor X-linked 301067 Family with seq…	CFAP47|0.008493492|82.15%	1CG-001|3CG-035|3CG-042|3CG-047|3CG-064|3CG-173|8CG-004
DGC	CFP	7	100	X	p22.33|p11.1	301780 Arylsulfatase C f form 300345 Microphthalmia isolated with coloboma 1 300471 Cubitus valgus with mental retardation and unusual facies 300484 Orofaciodigital syndrome VIII 300716 Mental retardation X-linked 95 300719 Deafness cataract retinitis pigmentosa and sperm abnormalities 300864 Cerebral-cerebellar-coloboma syndrome X-linked 309050 Lutheran suppressor X-linked 301067 Family with seq…	CFP|0.039345456|66%	1CG-001|3CG-035|3CG-042|3CG-047|3CG-064|3CG-173|8CG-004
DGC	CH17-340M24.3	7	100	X	q11.1|q28	300345 Microphthalmia isolated with coloboma 1 300471 Cubitus valgus with mental retardation and unusual facies 300484 Orofaciodigital syndrome VIII 300716 Mental retardation X-linked 95 300719 Deafness cataract retinitis pigmentosa and sperm abnormalities 300864 Cerebral-cerebellar-coloboma syndrome X-linked 309050 Lutheran suppressor X-linked 300010 A-11 gene 300074 X chromosome-controlling ele…	NA	1CG-001|3CG-035|3CG-042|3CG-047|3CG-064|3CG-173|8CG-004
DGC	CHIC1	7	100	X	q11.1|q28	300345 Microphthalmia isolated with coloboma 1 300471 Cubitus valgus with mental retardation and unusual facies 300484 Orofaciodigital syndrome VIII 300716 Mental retardation X-linked 95 300719 Deafness cataract retinitis pigmentosa and sperm abnormalities 300864 Cerebral-cerebellar-coloboma syndrome X-linked 309050 Lutheran suppressor X-linked 300010 A-11 gene 300074 X chromosome-controlling ele…	CHIC1|0.259957406|30.73%	1CG-001|3CG-035|3CG-042|3CG-047|3CG-064|3CG-173|8CG-004
DGC	CHM	7	100	X	q11.1|q28	300345 Microphthalmia isolated with coloboma 1 300471 Cubitus valgus with mental retardation and unusual facies 300484 Orofaciodigital syndrome VIII 300716 Mental retardation X-linked 95 300719 Deafness cataract retinitis pigmentosa and sperm abnormalities 300864 Cerebral-cerebellar-coloboma syndrome X-linked 309050 Lutheran suppressor X-linked 300010 A-11 gene 300074 X chromosome-controlling ele…	CHM|0.332696206|25.28%	1CG-001|3CG-035|3CG-042|3CG-047|3CG-064|3CG-173|8CG-004
DGC	CHMP1B2P	7	100	X	q11.1|q28	300345 Microphthalmia isolated with coloboma 1 300471 Cubitus valgus with mental retardation and unusual facies 300484 Orofaciodigital syndrome VIII 300716 Mental retardation X-linked 95 300719 Deafness cataract retinitis pigmentosa and sperm abnormalities 300864 Cerebral-cerebellar-coloboma syndrome X-linked 309050 Lutheran suppressor X-linked 300010 A-11 gene 300074 X chromosome-controlling ele…	NA	1CG-001|3CG-035|3CG-042|3CG-047|3CG-064|3CG-173|8CG-004
DGC	CHRDL1	7	100	X	q11.1|q28	300345 Microphthalmia isolated with coloboma 1 300471 Cubitus valgus with mental retardation and unusual facies 300484 Orofaciodigital syndrome VIII 300716 Mental retardation X-linked 95 300719 Deafness cataract retinitis pigmentosa and sperm abnormalities 300864 Cerebral-cerebellar-coloboma syndrome X-linked 309050 Lutheran suppressor X-linked 300010 A-11 gene 300074 X chromosome-controlling ele…	CHRDL1|0.341792402|24.72%	1CG-001|3CG-035|3CG-042|3CG-047|3CG-064|3CG-173|8CG-004
DGC	CHST7	7	100	X	p22.33|p11.1	301780 Arylsulfatase C f form 300345 Microphthalmia isolated with coloboma 1 300471 Cubitus valgus with mental retardation and unusual facies 300484 Orofaciodigital syndrome VIII 300716 Mental retardation X-linked 95 300719 Deafness cataract retinitis pigmentosa and sperm abnormalities 300864 Cerebral-cerebellar-coloboma syndrome X-linked 309050 Lutheran suppressor X-linked 301067 Family with seq…	CHST7|0.044380268|64.38%	1CG-001|3CG-035|3CG-042|3CG-047|3CG-064|3CG-173|8CG-004
DGC	CITED1	7	100	X	q11.1|q28	300345 Microphthalmia isolated with coloboma 1 300471 Cubitus valgus with mental retardation and unusual facies 300484 Orofaciodigital syndrome VIII 300716 Mental retardation X-linked 95 300719 Deafness cataract retinitis pigmentosa and sperm abnormalities 300864 Cerebral-cerebellar-coloboma syndrome X-linked 309050 Lutheran suppressor X-linked 300010 A-11 gene 300074 X chromosome-controlling ele…	CITED1|0.122175989|47.09%	1CG-001|3CG-035|3CG-042|3CG-047|3CG-064|3CG-173|8CG-004
DGC	CLCN4	7	100	X	p22.33|p11.1	301780 Arylsulfatase C f form 300345 Microphthalmia isolated with coloboma 1 300471 Cubitus valgus with mental retardation and unusual facies 300484 Orofaciodigital syndrome VIII 300716 Mental retardation X-linked 95 300719 Deafness cataract retinitis pigmentosa and sperm abnormalities 300864 Cerebral-cerebellar-coloboma syndrome X-linked 309050 Lutheran suppressor X-linked 301067 Family with seq…	CLCN4|0.28863626|28.47%	1CG-001|3CG-035|3CG-042|3CG-047|3CG-064|3CG-173|8CG-004
DGC	CLCN5	7	100	X	p22.33|p11.1	301780 Arylsulfatase C f form 300345 Microphthalmia isolated with coloboma 1 300471 Cubitus valgus with mental retardation and unusual facies 300484 Orofaciodigital syndrome VIII 300716 Mental retardation X-linked 95 300719 Deafness cataract retinitis pigmentosa and sperm abnormalities 300864 Cerebral-cerebellar-coloboma syndrome X-linked 309050 Lutheran suppressor X-linked 301067 Family with seq…	CLCN5|0.568612204|13.07%	1CG-001|3CG-035|3CG-042|3CG-047|3CG-064|3CG-173|8CG-004
DGC	CLDN2	7	100	X	q11.1|q28	300345 Microphthalmia isolated with coloboma 1 300471 Cubitus valgus with mental retardation and unusual facies 300484 Orofaciodigital syndrome VIII 300716 Mental retardation X-linked 95 300719 Deafness cataract retinitis pigmentosa and sperm abnormalities 300864 Cerebral-cerebellar-coloboma syndrome X-linked 309050 Lutheran suppressor X-linked 300010 A-11 gene 300074 X chromosome-controlling ele…	CLDN2|0.184956895|38.36%	1CG-001|3CG-035|3CG-042|3CG-047|3CG-064|3CG-173|8CG-004
DGC	CLDN34	7	100	X	p22.33|p11.1	301780 Arylsulfatase C f form 300345 Microphthalmia isolated with coloboma 1 300471 Cubitus valgus with mental retardation and unusual facies 300484 Orofaciodigital syndrome VIII 300716 Mental retardation X-linked 95 300719 Deafness cataract retinitis pigmentosa and sperm abnormalities 300864 Cerebral-cerebellar-coloboma syndrome X-linked 309050 Lutheran suppressor X-linked 301067 Family with seq…	NA	1CG-001|3CG-035|3CG-042|3CG-047|3CG-064|3CG-173|8CG-004
DGC	CLIC2	7	100	X	q11.1|q28	300345 Microphthalmia isolated with coloboma 1 300471 Cubitus valgus with mental retardation and unusual facies 300484 Orofaciodigital syndrome VIII 300716 Mental retardation X-linked 95 300719 Deafness cataract retinitis pigmentosa and sperm abnormalities 300864 Cerebral-cerebellar-coloboma syndrome X-linked 309050 Lutheran suppressor X-linked 300010 A-11 gene 300074 X chromosome-controlling ele…	CLIC2|0.19445312|37.35%	1CG-001|3CG-035|3CG-042|3CG-047|3CG-064|3CG-173|8CG-004
DGC	CLTRN	7	100	X	p22.33|p11.1	301780 Arylsulfatase C f form 300345 Microphthalmia isolated with coloboma 1 300471 Cubitus valgus with mental retardation and unusual facies 300484 Orofaciodigital syndrome VIII 300716 Mental retardation X-linked 95 300719 Deafness cataract retinitis pigmentosa and sperm abnormalities 300864 Cerebral-cerebellar-coloboma syndrome X-linked 309050 Lutheran suppressor X-linked 301067 Family with seq…	NA	1CG-001|3CG-035|3CG-042|3CG-047|3CG-064|3CG-173|8CG-004
DGC	CMC4	7	100	X	q11.1|q28	300345 Microphthalmia isolated with coloboma 1 300471 Cubitus valgus with mental retardation and unusual facies 300484 Orofaciodigital syndrome VIII 300716 Mental retardation X-linked 95 300719 Deafness cataract retinitis pigmentosa and sperm abnormalities 300864 Cerebral-cerebellar-coloboma syndrome X-linked 309050 Lutheran suppressor X-linked 300010 A-11 gene 300074 X chromosome-controlling ele…	CMC4|0.206484881|35.96%	1CG-001|3CG-035|3CG-042|3CG-047|3CG-064|3CG-173|8CG-004
DGC	CNGA2	7	100	X	q11.1|q28	300345 Microphthalmia isolated with coloboma 1 300471 Cubitus valgus with mental retardation and unusual facies 300484 Orofaciodigital syndrome VIII 300716 Mental retardation X-linked 95 300719 Deafness cataract retinitis pigmentosa and sperm abnormalities 300864 Cerebral-cerebellar-coloboma syndrome X-linked 309050 Lutheran suppressor X-linked 300010 A-11 gene 300074 X chromosome-controlling ele…	CNGA2|0.167139433|40.64%	1CG-001|3CG-035|3CG-042|3CG-047|3CG-064|3CG-173|8CG-004
DGC	CNKSR2	7	100	X	p22.33|p11.1	301780 Arylsulfatase C f form 300345 Microphthalmia isolated with coloboma 1 300471 Cubitus valgus with mental retardation and unusual facies 300484 Orofaciodigital syndrome VIII 300716 Mental retardation X-linked 95 300719 Deafness cataract retinitis pigmentosa and sperm abnormalities 300864 Cerebral-cerebellar-coloboma syndrome X-linked 309050 Lutheran suppressor X-linked 301067 Family with seq…	CNKSR2|0.732601094|7.56%	1CG-001|3CG-035|3CG-042|3CG-047|3CG-064|3CG-173|8CG-004
DGC	COL4A5	7	100	X	q11.1|q28	300345 Microphthalmia isolated with coloboma 1 300471 Cubitus valgus with mental retardation and unusual facies 300484 Orofaciodigital syndrome VIII 300716 Mental retardation X-linked 95 300719 Deafness cataract retinitis pigmentosa and sperm abnormalities 300864 Cerebral-cerebellar-coloboma syndrome X-linked 309050 Lutheran suppressor X-linked 300010 A-11 gene 300074 X chromosome-controlling ele…	COL4A5|0.684108995|8.97%	1CG-001|3CG-035|3CG-042|3CG-047|3CG-064|3CG-173|8CG-004
DGC	COL4A6	7	100	X	q11.1|q28	300345 Microphthalmia isolated with coloboma 1 300471 Cubitus valgus with mental retardation and unusual facies 300484 Orofaciodigital syndrome VIII 300716 Mental retardation X-linked 95 300719 Deafness cataract retinitis pigmentosa and sperm abnormalities 300864 Cerebral-cerebellar-coloboma syndrome X-linked 309050 Lutheran suppressor X-linked 300010 A-11 gene 300074 X chromosome-controlling ele…	COL4A6|0.130757642|45.78%	1CG-001|3CG-035|3CG-042|3CG-047|3CG-064|3CG-173|8CG-004
DGC	COX7B	7	100	X	q11.1|q28	300345 Microphthalmia isolated with coloboma 1 300471 Cubitus valgus with mental retardation and unusual facies 300484 Orofaciodigital syndrome VIII 300716 Mental retardation X-linked 95 300719 Deafness cataract retinitis pigmentosa and sperm abnormalities 300864 Cerebral-cerebellar-coloboma syndrome X-linked 309050 Lutheran suppressor X-linked 300010 A-11 gene 300074 X chromosome-controlling ele…	COX7B|0.168396202|40.53%	1CG-001|3CG-035|3CG-042|3CG-047|3CG-064|3CG-173|8CG-004
DGC	CPXCR1	7	100	X	q11.1|q28	300345 Microphthalmia isolated with coloboma 1 300471 Cubitus valgus with mental retardation and unusual facies 300484 Orofaciodigital syndrome VIII 300716 Mental retardation X-linked 95 300719 Deafness cataract retinitis pigmentosa and sperm abnormalities 300864 Cerebral-cerebellar-coloboma syndrome X-linked 309050 Lutheran suppressor X-linked 300010 A-11 gene 300074 X chromosome-controlling ele…	CPXCR1|0.001467264|92.95%	1CG-001|3CG-035|3CG-042|3CG-047|3CG-064|3CG-173|8CG-004
DGC	CSAG1	7	100	X	q11.1|q28	300345 Microphthalmia isolated with coloboma 1 300471 Cubitus valgus with mental retardation and unusual facies 300484 Orofaciodigital syndrome VIII 300716 Mental retardation X-linked 95 300719 Deafness cataract retinitis pigmentosa and sperm abnormalities 300864 Cerebral-cerebellar-coloboma syndrome X-linked 309050 Lutheran suppressor X-linked 300010 A-11 gene 300074 X chromosome-controlling ele…	CSAG1|0.000765743|96.9%	1CG-001|3CG-035|3CG-042|3CG-047|3CG-064|3CG-173|8CG-004
DGC	CSAG3	7	100	X	q11.1|q28	300345 Microphthalmia isolated with coloboma 1 300471 Cubitus valgus with mental retardation and unusual facies 300484 Orofaciodigital syndrome VIII 300716 Mental retardation X-linked 95 300719 Deafness cataract retinitis pigmentosa and sperm abnormalities 300864 Cerebral-cerebellar-coloboma syndrome X-linked 309050 Lutheran suppressor X-linked 300010 A-11 gene 300074 X chromosome-controlling ele…	NA	1CG-001|3CG-035|3CG-042|3CG-047|3CG-064|3CG-173|8CG-004
DGC	CSAG4	7	100	X	q11.1|q28	300345 Microphthalmia isolated with coloboma 1 300471 Cubitus valgus with mental retardation and unusual facies 300484 Orofaciodigital syndrome VIII 300716 Mental retardation X-linked 95 300719 Deafness cataract retinitis pigmentosa and sperm abnormalities 300864 Cerebral-cerebellar-coloboma syndrome X-linked 309050 Lutheran suppressor X-linked 300010 A-11 gene 300074 X chromosome-controlling ele…	NA	1CG-001|3CG-035|3CG-042|3CG-047|3CG-064|3CG-173|8CG-004
DGC	CSTF2	7	100	X	q11.1|q28	300345 Microphthalmia isolated with coloboma 1 300471 Cubitus valgus with mental retardation and unusual facies 300484 Orofaciodigital syndrome VIII 300716 Mental retardation X-linked 95 300719 Deafness cataract retinitis pigmentosa and sperm abnormalities 300864 Cerebral-cerebellar-coloboma syndrome X-linked 309050 Lutheran suppressor X-linked 300010 A-11 gene 300074 X chromosome-controlling ele…	CSTF2|0.33220569|25.31%	1CG-001|3CG-035|3CG-042|3CG-047|3CG-064|3CG-173|8CG-004
DGC	CT45A1	7	100	X	q11.1|q28	300345 Microphthalmia isolated with coloboma 1 300471 Cubitus valgus with mental retardation and unusual facies 300484 Orofaciodigital syndrome VIII 300716 Mental retardation X-linked 95 300719 Deafness cataract retinitis pigmentosa and sperm abnormalities 300864 Cerebral-cerebellar-coloboma syndrome X-linked 309050 Lutheran suppressor X-linked 300010 A-11 gene 300074 X chromosome-controlling ele…	CT45A1|0.00056557|98.09%	1CG-001|3CG-035|3CG-042|3CG-047|3CG-064|3CG-173|8CG-004
DGC	CT45A10	7	100	X	q11.1|q28	300345 Microphthalmia isolated with coloboma 1 300471 Cubitus valgus with mental retardation and unusual facies 300484 Orofaciodigital syndrome VIII 300716 Mental retardation X-linked 95 300719 Deafness cataract retinitis pigmentosa and sperm abnormalities 300864 Cerebral-cerebellar-coloboma syndrome X-linked 309050 Lutheran suppressor X-linked 300010 A-11 gene 300074 X chromosome-controlling ele…	NA	1CG-001|3CG-035|3CG-042|3CG-047|3CG-064|3CG-173|8CG-004
DGC	CT45A2	7	100	X	q11.1|q28	300345 Microphthalmia isolated with coloboma 1 300471 Cubitus valgus with mental retardation and unusual facies 300484 Orofaciodigital syndrome VIII 300716 Mental retardation X-linked 95 300719 Deafness cataract retinitis pigmentosa and sperm abnormalities 300864 Cerebral-cerebellar-coloboma syndrome X-linked 309050 Lutheran suppressor X-linked 300010 A-11 gene 300074 X chromosome-controlling ele…	CT45A2|0.000427409|98.79%	1CG-001|3CG-035|3CG-042|3CG-047|3CG-064|3CG-173|8CG-004
DGC	CT45A3	7	100	X	q11.1|q28	300345 Microphthalmia isolated with coloboma 1 300471 Cubitus valgus with mental retardation and unusual facies 300484 Orofaciodigital syndrome VIII 300716 Mental retardation X-linked 95 300719 Deafness cataract retinitis pigmentosa and sperm abnormalities 300864 Cerebral-cerebellar-coloboma syndrome X-linked 309050 Lutheran suppressor X-linked 300010 A-11 gene 300074 X chromosome-controlling ele…	CT45A3|0.000489652|98.49%	1CG-001|3CG-035|3CG-042|3CG-047|3CG-064|3CG-173|8CG-004
DGC	CT45A5	7	100	X	q11.1|q28	300345 Microphthalmia isolated with coloboma 1 300471 Cubitus valgus with mental retardation and unusual facies 300484 Orofaciodigital syndrome VIII 300716 Mental retardation X-linked 95 300719 Deafness cataract retinitis pigmentosa and sperm abnormalities 300864 Cerebral-cerebellar-coloboma syndrome X-linked 309050 Lutheran suppressor X-linked 300010 A-11 gene 300074 X chromosome-controlling ele…	CT45A5|0.000543107|98.22%	1CG-001|3CG-035|3CG-042|3CG-047|3CG-064|3CG-173|8CG-004
DGC	CT45A6	7	100	X	q11.1|q28	300345 Microphthalmia isolated with coloboma 1 300471 Cubitus valgus with mental retardation and unusual facies 300484 Orofaciodigital syndrome VIII 300716 Mental retardation X-linked 95 300719 Deafness cataract retinitis pigmentosa and sperm abnormalities 300864 Cerebral-cerebellar-coloboma syndrome X-linked 309050 Lutheran suppressor X-linked 300010 A-11 gene 300074 X chromosome-controlling ele…	CT45A6|0.000778976|96.79%	1CG-001|3CG-035|3CG-042|3CG-047|3CG-064|3CG-173|8CG-004
DGC	CT45A7	7	100	X	q11.1|q28	300345 Microphthalmia isolated with coloboma 1 300471 Cubitus valgus with mental retardation and unusual facies 300484 Orofaciodigital syndrome VIII 300716 Mental retardation X-linked 95 300719 Deafness cataract retinitis pigmentosa and sperm abnormalities 300864 Cerebral-cerebellar-coloboma syndrome X-linked 309050 Lutheran suppressor X-linked 300010 A-11 gene 300074 X chromosome-controlling ele…	NA	1CG-001|3CG-035|3CG-042|3CG-047|3CG-064|3CG-173|8CG-004
DGC	CT45A8	7	100	X	q11.1|q28	300345 Microphthalmia isolated with coloboma 1 300471 Cubitus valgus with mental retardation and unusual facies 300484 Orofaciodigital syndrome VIII 300716 Mental retardation X-linked 95 300719 Deafness cataract retinitis pigmentosa and sperm abnormalities 300864 Cerebral-cerebellar-coloboma syndrome X-linked 309050 Lutheran suppressor X-linked 300010 A-11 gene 300074 X chromosome-controlling ele…	NA	1CG-001|3CG-035|3CG-042|3CG-047|3CG-064|3CG-173|8CG-004
DGC	CT45A9	7	100	X	q11.1|q28	300345 Microphthalmia isolated with coloboma 1 300471 Cubitus valgus with mental retardation and unusual facies 300484 Orofaciodigital syndrome VIII 300716 Mental retardation X-linked 95 300719 Deafness cataract retinitis pigmentosa and sperm abnormalities 300864 Cerebral-cerebellar-coloboma syndrome X-linked 309050 Lutheran suppressor X-linked 300010 A-11 gene 300074 X chromosome-controlling ele…	NA	1CG-001|3CG-035|3CG-042|3CG-047|3CG-064|3CG-173|8CG-004
DGC	CT47A1	7	100	X	q11.1|q28	300345 Microphthalmia isolated with coloboma 1 300471 Cubitus valgus with mental retardation and unusual facies 300484 Orofaciodigital syndrome VIII 300716 Mental retardation X-linked 95 300719 Deafness cataract retinitis pigmentosa and sperm abnormalities 300864 Cerebral-cerebellar-coloboma syndrome X-linked 309050 Lutheran suppressor X-linked 300010 A-11 gene 300074 X chromosome-controlling ele…	CT47A1|0.000444829|98.72%	1CG-001|3CG-035|3CG-042|3CG-047|3CG-064|3CG-173|8CG-004
DGC	CT47A10	7	100	X	q11.1|q28	300345 Microphthalmia isolated with coloboma 1 300471 Cubitus valgus with mental retardation and unusual facies 300484 Orofaciodigital syndrome VIII 300716 Mental retardation X-linked 95 300719 Deafness cataract retinitis pigmentosa and sperm abnormalities 300864 Cerebral-cerebellar-coloboma syndrome X-linked 309050 Lutheran suppressor X-linked 300010 A-11 gene 300074 X chromosome-controlling ele…	CT47A10|0.000746432|97.02%	1CG-001|3CG-035|3CG-042|3CG-047|3CG-064|3CG-173|8CG-004
DGC	CT47A11	7	100	X	q11.1|q28	300345 Microphthalmia isolated with coloboma 1 300471 Cubitus valgus with mental retardation and unusual facies 300484 Orofaciodigital syndrome VIII 300716 Mental retardation X-linked 95 300719 Deafness cataract retinitis pigmentosa and sperm abnormalities 300864 Cerebral-cerebellar-coloboma syndrome X-linked 309050 Lutheran suppressor X-linked 300010 A-11 gene 300074 X chromosome-controlling ele…	CT47A11|0.000713211|97.19%	1CG-001|3CG-035|3CG-042|3CG-047|3CG-064|3CG-173|8CG-004
DGC	CT47A12	7	100	X	q11.1|q28	300345 Microphthalmia isolated with coloboma 1 300471 Cubitus valgus with mental retardation and unusual facies 300484 Orofaciodigital syndrome VIII 300716 Mental retardation X-linked 95 300719 Deafness cataract retinitis pigmentosa and sperm abnormalities 300864 Cerebral-cerebellar-coloboma syndrome X-linked 309050 Lutheran suppressor X-linked 300010 A-11 gene 300074 X chromosome-controlling ele…	CT47A12|0.000708324|97.21%	1CG-001|3CG-035|3CG-042|3CG-047|3CG-064|3CG-173|8CG-004
DGC	CT47A2	7	100	X	q11.1|q28	300345 Microphthalmia isolated with coloboma 1 300471 Cubitus valgus with mental retardation and unusual facies 300484 Orofaciodigital syndrome VIII 300716 Mental retardation X-linked 95 300719 Deafness cataract retinitis pigmentosa and sperm abnormalities 300864 Cerebral-cerebellar-coloboma syndrome X-linked 309050 Lutheran suppressor X-linked 300010 A-11 gene 300074 X chromosome-controlling ele…	CT47A2|0.000687805|97.34%	1CG-001|3CG-035|3CG-042|3CG-047|3CG-064|3CG-173|8CG-004
DGC	CT47A3	7	100	X	q11.1|q28	300345 Microphthalmia isolated with coloboma 1 300471 Cubitus valgus with mental retardation and unusual facies 300484 Orofaciodigital syndrome VIII 300716 Mental retardation X-linked 95 300719 Deafness cataract retinitis pigmentosa and sperm abnormalities 300864 Cerebral-cerebellar-coloboma syndrome X-linked 309050 Lutheran suppressor X-linked 300010 A-11 gene 300074 X chromosome-controlling ele…	CT47A3|0.000981332|95.55%	1CG-001|3CG-035|3CG-042|3CG-047|3CG-064|3CG-173|8CG-004
DGC	CT47A4	7	100	X	q11.1|q28	300345 Microphthalmia isolated with coloboma 1 300471 Cubitus valgus with mental retardation and unusual facies 300484 Orofaciodigital syndrome VIII 300716 Mental retardation X-linked 95 300719 Deafness cataract retinitis pigmentosa and sperm abnormalities 300864 Cerebral-cerebellar-coloboma syndrome X-linked 309050 Lutheran suppressor X-linked 300010 A-11 gene 300074 X chromosome-controlling ele…	CT47A4|0.000986163|95.54%	1CG-001|3CG-035|3CG-042|3CG-047|3CG-064|3CG-173|8CG-004
DGC	CT47A5	7	100	X	q11.1|q28	300345 Microphthalmia isolated with coloboma 1 300471 Cubitus valgus with mental retardation and unusual facies 300484 Orofaciodigital syndrome VIII 300716 Mental retardation X-linked 95 300719 Deafness cataract retinitis pigmentosa and sperm abnormalities 300864 Cerebral-cerebellar-coloboma syndrome X-linked 309050 Lutheran suppressor X-linked 300010 A-11 gene 300074 X chromosome-controlling ele…	CT47A5|0.000775274|96.84%	1CG-001|3CG-035|3CG-042|3CG-047|3CG-064|3CG-173|8CG-004
DGC	CT47A6	7	100	X	q11.1|q28	300345 Microphthalmia isolated with coloboma 1 300471 Cubitus valgus with mental retardation and unusual facies 300484 Orofaciodigital syndrome VIII 300716 Mental retardation X-linked 95 300719 Deafness cataract retinitis pigmentosa and sperm abnormalities 300864 Cerebral-cerebellar-coloboma syndrome X-linked 309050 Lutheran suppressor X-linked 300010 A-11 gene 300074 X chromosome-controlling ele…	CT47A6|0.00097095|95.64%	1CG-001|3CG-035|3CG-042|3CG-047|3CG-064|3CG-173|8CG-004
DGC	CT47A7	7	100	X	q11.1|q28	300345 Microphthalmia isolated with coloboma 1 300471 Cubitus valgus with mental retardation and unusual facies 300484 Orofaciodigital syndrome VIII 300716 Mental retardation X-linked 95 300719 Deafness cataract retinitis pigmentosa and sperm abnormalities 300864 Cerebral-cerebellar-coloboma syndrome X-linked 309050 Lutheran suppressor X-linked 300010 A-11 gene 300074 X chromosome-controlling ele…	CT47A7|0.000847315|96.38%	1CG-001|3CG-035|3CG-042|3CG-047|3CG-064|3CG-173|8CG-004
DGC	CT47A8	7	100	X	q11.1|q28	300345 Microphthalmia isolated with coloboma 1 300471 Cubitus valgus with mental retardation and unusual facies 300484 Orofaciodigital syndrome VIII 300716 Mental retardation X-linked 95 300719 Deafness cataract retinitis pigmentosa and sperm abnormalities 300864 Cerebral-cerebellar-coloboma syndrome X-linked 309050 Lutheran suppressor X-linked 300010 A-11 gene 300074 X chromosome-controlling ele…	CT47A8|0.000955631|95.76%	1CG-001|3CG-035|3CG-042|3CG-047|3CG-064|3CG-173|8CG-004
DGC	CT47A9	7	100	X	q11.1|q28	300345 Microphthalmia isolated with coloboma 1 300471 Cubitus valgus with mental retardation and unusual facies 300484 Orofaciodigital syndrome VIII 300716 Mental retardation X-linked 95 300719 Deafness cataract retinitis pigmentosa and sperm abnormalities 300864 Cerebral-cerebellar-coloboma syndrome X-linked 309050 Lutheran suppressor X-linked 300010 A-11 gene 300074 X chromosome-controlling ele…	CT47A9|0.001099594|94.95%	1CG-001|3CG-035|3CG-042|3CG-047|3CG-064|3CG-173|8CG-004
DGC	CT47B1	7	100	X	q11.1|q28	300345 Microphthalmia isolated with coloboma 1 300471 Cubitus valgus with mental retardation and unusual facies 300484 Orofaciodigital syndrome VIII 300716 Mental retardation X-linked 95 300719 Deafness cataract retinitis pigmentosa and sperm abnormalities 300864 Cerebral-cerebellar-coloboma syndrome X-linked 309050 Lutheran suppressor X-linked 300010 A-11 gene 300074 X chromosome-controlling ele…	CT47B1|0.000279084|99.49%	1CG-001|3CG-035|3CG-042|3CG-047|3CG-064|3CG-173|8CG-004
DGC	CT55	7	100	X	q11.1|q28	300345 Microphthalmia isolated with coloboma 1 300471 Cubitus valgus with mental retardation and unusual facies 300484 Orofaciodigital syndrome VIII 300716 Mental retardation X-linked 95 300719 Deafness cataract retinitis pigmentosa and sperm abnormalities 300864 Cerebral-cerebellar-coloboma syndrome X-linked 309050 Lutheran suppressor X-linked 300010 A-11 gene 300074 X chromosome-controlling ele…	CT55|0.000403592|98.93%	1CG-001|3CG-035|3CG-042|3CG-047|3CG-064|3CG-173|8CG-004
DGC	CT83	7	100	X	q11.1|q28	300345 Microphthalmia isolated with coloboma 1 300471 Cubitus valgus with mental retardation and unusual facies 300484 Orofaciodigital syndrome VIII 300716 Mental retardation X-linked 95 300719 Deafness cataract retinitis pigmentosa and sperm abnormalities 300864 Cerebral-cerebellar-coloboma syndrome X-linked 309050 Lutheran suppressor X-linked 300010 A-11 gene 300074 X chromosome-controlling ele…	CT83|0.001071747|95.06%	1CG-001|3CG-035|3CG-042|3CG-047|3CG-064|3CG-173|8CG-004
DGC	CTAG1A	7	100	X	q11.1|q28	300345 Microphthalmia isolated with coloboma 1 300471 Cubitus valgus with mental retardation and unusual facies 300484 Orofaciodigital syndrome VIII 300716 Mental retardation X-linked 95 300719 Deafness cataract retinitis pigmentosa and sperm abnormalities 300864 Cerebral-cerebellar-coloboma syndrome X-linked 309050 Lutheran suppressor X-linked 300010 A-11 gene 300074 X chromosome-controlling ele…	CTAG1A|0.000465597|98.61%	1CG-001|3CG-035|3CG-042|3CG-047|3CG-064|3CG-173|8CG-004
DGC	CTAG1B	7	100	X	q11.1|q28	300345 Microphthalmia isolated with coloboma 1 300471 Cubitus valgus with mental retardation and unusual facies 300484 Orofaciodigital syndrome VIII 300716 Mental retardation X-linked 95 300719 Deafness cataract retinitis pigmentosa and sperm abnormalities 300864 Cerebral-cerebellar-coloboma syndrome X-linked 309050 Lutheran suppressor X-linked 300010 A-11 gene 300074 X chromosome-controlling ele…	CTAG1B|0.000573467|98.06%	1CG-001|3CG-035|3CG-042|3CG-047|3CG-064|3CG-173|8CG-004
DGC	CTAG2	7	100	X	q11.1|q28	300345 Microphthalmia isolated with coloboma 1 300471 Cubitus valgus with mental retardation and unusual facies 300484 Orofaciodigital syndrome VIII 300716 Mental retardation X-linked 95 300719 Deafness cataract retinitis pigmentosa and sperm abnormalities 300864 Cerebral-cerebellar-coloboma syndrome X-linked 309050 Lutheran suppressor X-linked 300010 A-11 gene 300074 X chromosome-controlling ele…	CTAG2|0.000106023|99.93%	1CG-001|3CG-035|3CG-042|3CG-047|3CG-064|3CG-173|8CG-004
DGC	CTPS2	7	100	X	p22.33|p11.1	301780 Arylsulfatase C f form 300345 Microphthalmia isolated with coloboma 1 300471 Cubitus valgus with mental retardation and unusual facies 300484 Orofaciodigital syndrome VIII 300716 Mental retardation X-linked 95 300719 Deafness cataract retinitis pigmentosa and sperm abnormalities 300864 Cerebral-cerebellar-coloboma syndrome X-linked 309050 Lutheran suppressor X-linked 301067 Family with seq…	CTPS2|0.247337379|31.79%	1CG-001|3CG-035|3CG-042|3CG-047|3CG-064|3CG-173|8CG-004
DGC	CUL4B	7	100	X	q11.1|q28	300345 Microphthalmia isolated with coloboma 1 300471 Cubitus valgus with mental retardation and unusual facies 300484 Orofaciodigital syndrome VIII 300716 Mental retardation X-linked 95 300719 Deafness cataract retinitis pigmentosa and sperm abnormalities 300864 Cerebral-cerebellar-coloboma syndrome X-linked 309050 Lutheran suppressor X-linked 300010 A-11 gene 300074 X chromosome-controlling ele…	CUL4B|0.706839918|8.31%	1CG-001|3CG-035|3CG-042|3CG-047|3CG-064|3CG-173|8CG-004
DGC	CXCR3	7	100	X	q11.1|q28	300345 Microphthalmia isolated with coloboma 1 300471 Cubitus valgus with mental retardation and unusual facies 300484 Orofaciodigital syndrome VIII 300716 Mental retardation X-linked 95 300719 Deafness cataract retinitis pigmentosa and sperm abnormalities 300864 Cerebral-cerebellar-coloboma syndrome X-linked 309050 Lutheran suppressor X-linked 300010 A-11 gene 300074 X chromosome-controlling ele…	CXCR3|0.069409244|57.62%	1CG-001|3CG-035|3CG-042|3CG-047|3CG-064|3CG-173|8CG-004
DGC	CXXC1P1	7	100	X	p22.33|p11.1	301780 Arylsulfatase C f form 300345 Microphthalmia isolated with coloboma 1 300471 Cubitus valgus with mental retardation and unusual facies 300484 Orofaciodigital syndrome VIII 300716 Mental retardation X-linked 95 300719 Deafness cataract retinitis pigmentosa and sperm abnormalities 300864 Cerebral-cerebellar-coloboma syndrome X-linked 309050 Lutheran suppressor X-linked 301067 Family with seq…	NA	1CG-001|3CG-035|3CG-042|3CG-047|3CG-064|3CG-173|8CG-004
DGC	CXorf38	7	100	X	p22.33|p11.1	301780 Arylsulfatase C f form 300345 Microphthalmia isolated with coloboma 1 300471 Cubitus valgus with mental retardation and unusual facies 300484 Orofaciodigital syndrome VIII 300716 Mental retardation X-linked 95 300719 Deafness cataract retinitis pigmentosa and sperm abnormalities 300864 Cerebral-cerebellar-coloboma syndrome X-linked 309050 Lutheran suppressor X-linked 301067 Family with seq…	CXorf38|0.065046146|58.62%	1CG-001|3CG-035|3CG-042|3CG-047|3CG-064|3CG-173|8CG-004
DGC	CXorf49	7	100	X	q11.1|q28	300345 Microphthalmia isolated with coloboma 1 300471 Cubitus valgus with mental retardation and unusual facies 300484 Orofaciodigital syndrome VIII 300716 Mental retardation X-linked 95 300719 Deafness cataract retinitis pigmentosa and sperm abnormalities 300864 Cerebral-cerebellar-coloboma syndrome X-linked 309050 Lutheran suppressor X-linked 300010 A-11 gene 300074 X chromosome-controlling ele…	NA	1CG-001|3CG-035|3CG-042|3CG-047|3CG-064|3CG-173|8CG-004
DGC	CXorf49B	7	100	X	q11.1|q28	300345 Microphthalmia isolated with coloboma 1 300471 Cubitus valgus with mental retardation and unusual facies 300484 Orofaciodigital syndrome VIII 300716 Mental retardation X-linked 95 300719 Deafness cataract retinitis pigmentosa and sperm abnormalities 300864 Cerebral-cerebellar-coloboma syndrome X-linked 309050 Lutheran suppressor X-linked 300010 A-11 gene 300074 X chromosome-controlling ele…	NA	1CG-001|3CG-035|3CG-042|3CG-047|3CG-064|3CG-173|8CG-004
DGC	CXorf51A	7	100	X	q11.1|q28	300345 Microphthalmia isolated with coloboma 1 300471 Cubitus valgus with mental retardation and unusual facies 300484 Orofaciodigital syndrome VIII 300716 Mental retardation X-linked 95 300719 Deafness cataract retinitis pigmentosa and sperm abnormalities 300864 Cerebral-cerebellar-coloboma syndrome X-linked 309050 Lutheran suppressor X-linked 300010 A-11 gene 300074 X chromosome-controlling ele…	NA	1CG-001|3CG-035|3CG-042|3CG-047|3CG-064|3CG-173|8CG-004
DGC	CXorf51B	7	100	X	q11.1|q28	300345 Microphthalmia isolated with coloboma 1 300471 Cubitus valgus with mental retardation and unusual facies 300484 Orofaciodigital syndrome VIII 300716 Mental retardation X-linked 95 300719 Deafness cataract retinitis pigmentosa and sperm abnormalities 300864 Cerebral-cerebellar-coloboma syndrome X-linked 309050 Lutheran suppressor X-linked 300010 A-11 gene 300074 X chromosome-controlling ele…	NA	1CG-001|3CG-035|3CG-042|3CG-047|3CG-064|3CG-173|8CG-004
DGC	CXorf56	7	100	X	q11.1|q28	300345 Microphthalmia isolated with coloboma 1 300471 Cubitus valgus with mental retardation and unusual facies 300484 Orofaciodigital syndrome VIII 300716 Mental retardation X-linked 95 300719 Deafness cataract retinitis pigmentosa and sperm abnormalities 300864 Cerebral-cerebellar-coloboma syndrome X-linked 309050 Lutheran suppressor X-linked 300010 A-11 gene 300074 X chromosome-controlling ele…	CXorf56|0.412595461|20.01%	1CG-001|3CG-035|3CG-042|3CG-047|3CG-064|3CG-173|8CG-004
DGC	CXorf58	7	100	X	p22.33|p11.1	301780 Arylsulfatase C f form 300345 Microphthalmia isolated with coloboma 1 300471 Cubitus valgus with mental retardation and unusual facies 300484 Orofaciodigital syndrome VIII 300716 Mental retardation X-linked 95 300719 Deafness cataract retinitis pigmentosa and sperm abnormalities 300864 Cerebral-cerebellar-coloboma syndrome X-linked 309050 Lutheran suppressor X-linked 301067 Family with seq…	CXorf58|0.013383355|78.26%	1CG-001|3CG-035|3CG-042|3CG-047|3CG-064|3CG-173|8CG-004
DGC	CXorf65	7	100	X	q11.1|q28	300345 Microphthalmia isolated with coloboma 1 300471 Cubitus valgus with mental retardation and unusual facies 300484 Orofaciodigital syndrome VIII 300716 Mental retardation X-linked 95 300719 Deafness cataract retinitis pigmentosa and sperm abnormalities 300864 Cerebral-cerebellar-coloboma syndrome X-linked 309050 Lutheran suppressor X-linked 300010 A-11 gene 300074 X chromosome-controlling ele…	CXorf65|0.013213084|78.35%	1CG-001|3CG-035|3CG-042|3CG-047|3CG-064|3CG-173|8CG-004
DGC	CXorf66	7	100	X	q11.1|q28	300345 Microphthalmia isolated with coloboma 1 300471 Cubitus valgus with mental retardation and unusual facies 300484 Orofaciodigital syndrome VIII 300716 Mental retardation X-linked 95 300719 Deafness cataract retinitis pigmentosa and sperm abnormalities 300864 Cerebral-cerebellar-coloboma syndrome X-linked 309050 Lutheran suppressor X-linked 300010 A-11 gene 300074 X chromosome-controlling ele…	CXorf66|0.000287232|99.46%	1CG-001|3CG-035|3CG-042|3CG-047|3CG-064|3CG-173|8CG-004
DGC	CYBB	7	100	X	p22.33|p11.1	301780 Arylsulfatase C f form 300345 Microphthalmia isolated with coloboma 1 300471 Cubitus valgus with mental retardation and unusual facies 300484 Orofaciodigital syndrome VIII 300716 Mental retardation X-linked 95 300719 Deafness cataract retinitis pigmentosa and sperm abnormalities 300864 Cerebral-cerebellar-coloboma syndrome X-linked 309050 Lutheran suppressor X-linked 301067 Family with seq…	CYBB|0.634611688|10.63%	1CG-001|3CG-035|3CG-042|3CG-047|3CG-064|3CG-173|8CG-004
DGC	CYLC1	7	100	X	q11.1|q28	300345 Microphthalmia isolated with coloboma 1 300471 Cubitus valgus with mental retardation and unusual facies 300484 Orofaciodigital syndrome VIII 300716 Mental retardation X-linked 95 300719 Deafness cataract retinitis pigmentosa and sperm abnormalities 300864 Cerebral-cerebellar-coloboma syndrome X-linked 309050 Lutheran suppressor X-linked 300010 A-11 gene 300074 X chromosome-controlling ele…	CYLC1|0.003084376|88.52%	1CG-001|3CG-035|3CG-042|3CG-047|3CG-064|3CG-173|8CG-004
DGC	CYSLTR1	7	100	X	q11.1|q28	300345 Microphthalmia isolated with coloboma 1 300471 Cubitus valgus with mental retardation and unusual facies 300484 Orofaciodigital syndrome VIII 300716 Mental retardation X-linked 95 300719 Deafness cataract retinitis pigmentosa and sperm abnormalities 300864 Cerebral-cerebellar-coloboma syndrome X-linked 309050 Lutheran suppressor X-linked 300010 A-11 gene 300074 X chromosome-controlling ele…	CYSLTR1|0.093771876|52.42%	1CG-001|3CG-035|3CG-042|3CG-047|3CG-064|3CG-173|8CG-004
DGC	DACH2	7	100	X	q11.1|q28	300345 Microphthalmia isolated with coloboma 1 300471 Cubitus valgus with mental retardation and unusual facies 300484 Orofaciodigital syndrome VIII 300716 Mental retardation X-linked 95 300719 Deafness cataract retinitis pigmentosa and sperm abnormalities 300864 Cerebral-cerebellar-coloboma syndrome X-linked 309050 Lutheran suppressor X-linked 300010 A-11 gene 300074 X chromosome-controlling ele…	DACH2|0.697778795|8.56%	1CG-001|3CG-035|3CG-042|3CG-047|3CG-064|3CG-173|8CG-004
DGC	DANT1	7	100	X	q11.1|q28	300345 Microphthalmia isolated with coloboma 1 300471 Cubitus valgus with mental retardation and unusual facies 300484 Orofaciodigital syndrome VIII 300716 Mental retardation X-linked 95 300719 Deafness cataract retinitis pigmentosa and sperm abnormalities 300864 Cerebral-cerebellar-coloboma syndrome X-linked 309050 Lutheran suppressor X-linked 300010 A-11 gene 300074 X chromosome-controlling ele…	NA	1CG-001|3CG-035|3CG-042|3CG-047|3CG-064|3CG-173|8CG-004
DGC	DANT2	7	100	X	q11.1|q28	300345 Microphthalmia isolated with coloboma 1 300471 Cubitus valgus with mental retardation and unusual facies 300484 Orofaciodigital syndrome VIII 300716 Mental retardation X-linked 95 300719 Deafness cataract retinitis pigmentosa and sperm abnormalities 300864 Cerebral-cerebellar-coloboma syndrome X-linked 309050 Lutheran suppressor X-linked 300010 A-11 gene 300074 X chromosome-controlling ele…	NA	1CG-001|3CG-035|3CG-042|3CG-047|3CG-064|3CG-173|8CG-004
DGC	DCAF12L1	7	100	X	q11.1|q28	300345 Microphthalmia isolated with coloboma 1 300471 Cubitus valgus with mental retardation and unusual facies 300484 Orofaciodigital syndrome VIII 300716 Mental retardation X-linked 95 300719 Deafness cataract retinitis pigmentosa and sperm abnormalities 300864 Cerebral-cerebellar-coloboma syndrome X-linked 309050 Lutheran suppressor X-linked 300010 A-11 gene 300074 X chromosome-controlling ele…	DCAF12L1|0.003947549|87.11%	1CG-001|3CG-035|3CG-042|3CG-047|3CG-064|3CG-173|8CG-004
DGC	DCAF12L2	7	100	X	q11.1|q28	300345 Microphthalmia isolated with coloboma 1 300471 Cubitus valgus with mental retardation and unusual facies 300484 Orofaciodigital syndrome VIII 300716 Mental retardation X-linked 95 300719 Deafness cataract retinitis pigmentosa and sperm abnormalities 300864 Cerebral-cerebellar-coloboma syndrome X-linked 309050 Lutheran suppressor X-linked 300010 A-11 gene 300074 X chromosome-controlling ele…	DCAF12L2|0.011708007|79.44%	1CG-001|3CG-035|3CG-042|3CG-047|3CG-064|3CG-173|8CG-004
DGC	DCAF8L1	7	100	X	p22.33|p11.1	301780 Arylsulfatase C f form 300345 Microphthalmia isolated with coloboma 1 300471 Cubitus valgus with mental retardation and unusual facies 300484 Orofaciodigital syndrome VIII 300716 Mental retardation X-linked 95 300719 Deafness cataract retinitis pigmentosa and sperm abnormalities 300864 Cerebral-cerebellar-coloboma syndrome X-linked 309050 Lutheran suppressor X-linked 301067 Family with seq…	DCAF8L1|0.001390363|93.4%	1CG-001|3CG-035|3CG-042|3CG-047|3CG-064|3CG-173|8CG-004
DGC	DCAF8L2	7	100	X	p22.33|p11.1	301780 Arylsulfatase C f form 300345 Microphthalmia isolated with coloboma 1 300471 Cubitus valgus with mental retardation and unusual facies 300484 Orofaciodigital syndrome VIII 300716 Mental retardation X-linked 95 300719 Deafness cataract retinitis pigmentosa and sperm abnormalities 300864 Cerebral-cerebellar-coloboma syndrome X-linked 309050 Lutheran suppressor X-linked 301067 Family with seq…	DCAF8L2|0.000974393|95.61%	1CG-001|3CG-035|3CG-042|3CG-047|3CG-064|3CG-173|8CG-004
DGC	DCX	7	100	X	q11.1|q28	300345 Microphthalmia isolated with coloboma 1 300471 Cubitus valgus with mental retardation and unusual facies 300484 Orofaciodigital syndrome VIII 300716 Mental retardation X-linked 95 300719 Deafness cataract retinitis pigmentosa and sperm abnormalities 300864 Cerebral-cerebellar-coloboma syndrome X-linked 309050 Lutheran suppressor X-linked 300010 A-11 gene 300074 X chromosome-controlling ele…	DCX|0.971869047|1.65%	1CG-001|3CG-035|3CG-042|3CG-047|3CG-064|3CG-173|8CG-004
DGC	DDX3X	7	100	X	p22.33|p11.1	301780 Arylsulfatase C f form 300345 Microphthalmia isolated with coloboma 1 300471 Cubitus valgus with mental retardation and unusual facies 300484 Orofaciodigital syndrome VIII 300716 Mental retardation X-linked 95 300719 Deafness cataract retinitis pigmentosa and sperm abnormalities 300864 Cerebral-cerebellar-coloboma syndrome X-linked 309050 Lutheran suppressor X-linked 301067 Family with seq…	DDX3X|0.576936276|12.73%	1CG-001|3CG-035|3CG-042|3CG-047|3CG-064|3CG-173|8CG-004
DGC	DDX53	7	100	X	p22.33|p11.1	301780 Arylsulfatase C f form 300345 Microphthalmia isolated with coloboma 1 300471 Cubitus valgus with mental retardation and unusual facies 300484 Orofaciodigital syndrome VIII 300716 Mental retardation X-linked 95 300719 Deafness cataract retinitis pigmentosa and sperm abnormalities 300864 Cerebral-cerebellar-coloboma syndrome X-linked 309050 Lutheran suppressor X-linked 301067 Family with seq…	DDX53|0.002078516|90.77%	1CG-001|3CG-035|3CG-042|3CG-047|3CG-064|3CG-173|8CG-004
DGC	DENND10P1	7	100	X	q11.1|q28	300345 Microphthalmia isolated with coloboma 1 300471 Cubitus valgus with mental retardation and unusual facies 300484 Orofaciodigital syndrome VIII 300716 Mental retardation X-linked 95 300719 Deafness cataract retinitis pigmentosa and sperm abnormalities 300864 Cerebral-cerebellar-coloboma syndrome X-linked 309050 Lutheran suppressor X-linked 300010 A-11 gene 300074 X chromosome-controlling ele…	NA	1CG-001|3CG-035|3CG-042|3CG-047|3CG-064|3CG-173|8CG-004
DGC	DGAT2L6	7	100	X	q11.1|q28	300345 Microphthalmia isolated with coloboma 1 300471 Cubitus valgus with mental retardation and unusual facies 300484 Orofaciodigital syndrome VIII 300716 Mental retardation X-linked 95 300719 Deafness cataract retinitis pigmentosa and sperm abnormalities 300864 Cerebral-cerebellar-coloboma syndrome X-linked 309050 Lutheran suppressor X-linked 300010 A-11 gene 300074 X chromosome-controlling ele…	DGAT2L6|0.027807037|70.51%	1CG-001|3CG-035|3CG-042|3CG-047|3CG-064|3CG-173|8CG-004
DGC	DGKK	7	100	X	p22.33|p11.1	301780 Arylsulfatase C f form 300345 Microphthalmia isolated with coloboma 1 300471 Cubitus valgus with mental retardation and unusual facies 300484 Orofaciodigital syndrome VIII 300716 Mental retardation X-linked 95 300719 Deafness cataract retinitis pigmentosa and sperm abnormalities 300864 Cerebral-cerebellar-coloboma syndrome X-linked 309050 Lutheran suppressor X-linked 301067 Family with seq…	NA	1CG-001|3CG-035|3CG-042|3CG-047|3CG-064|3CG-173|8CG-004
DGC	DIAPH2	7	100	X	q11.1|q28	300345 Microphthalmia isolated with coloboma 1 300471 Cubitus valgus with mental retardation and unusual facies 300484 Orofaciodigital syndrome VIII 300716 Mental retardation X-linked 95 300719 Deafness cataract retinitis pigmentosa and sperm abnormalities 300864 Cerebral-cerebellar-coloboma syndrome X-linked 309050 Lutheran suppressor X-linked 300010 A-11 gene 300074 X chromosome-controlling ele…	DIAPH2|0.871794471|4.17%	1CG-001|3CG-035|3CG-042|3CG-047|3CG-064|3CG-173|8CG-004
DGC	DIAPH2-AS1	7	100	X	q11.1|q28	300345 Microphthalmia isolated with coloboma 1 300471 Cubitus valgus with mental retardation and unusual facies 300484 Orofaciodigital syndrome VIII 300716 Mental retardation X-linked 95 300719 Deafness cataract retinitis pigmentosa and sperm abnormalities 300864 Cerebral-cerebellar-coloboma syndrome X-linked 309050 Lutheran suppressor X-linked 300010 A-11 gene 300074 X chromosome-controlling ele…	NA	1CG-001|3CG-035|3CG-042|3CG-047|3CG-064|3CG-173|8CG-004
DGC	DIPK2B	7	100	X	p22.33|p11.1	301780 Arylsulfatase C f form 300345 Microphthalmia isolated with coloboma 1 300471 Cubitus valgus with mental retardation and unusual facies 300484 Orofaciodigital syndrome VIII 300716 Mental retardation X-linked 95 300719 Deafness cataract retinitis pigmentosa and sperm abnormalities 300864 Cerebral-cerebellar-coloboma syndrome X-linked 309050 Lutheran suppressor X-linked 301067 Family with seq…	NA	1CG-001|3CG-035|3CG-042|3CG-047|3CG-064|3CG-173|8CG-004
DGC	DKC1	7	100	X	q11.1|q28	300345 Microphthalmia isolated with coloboma 1 300471 Cubitus valgus with mental retardation and unusual facies 300484 Orofaciodigital syndrome VIII 300716 Mental retardation X-linked 95 300719 Deafness cataract retinitis pigmentosa and sperm abnormalities 300864 Cerebral-cerebellar-coloboma syndrome X-linked 309050 Lutheran suppressor X-linked 300010 A-11 gene 300074 X chromosome-controlling ele…	DKC1|0.779908958|6.32%	1CG-001|3CG-035|3CG-042|3CG-047|3CG-064|3CG-173|8CG-004
DGC	DLG3	7	100	X	q11.1|q28	300345 Microphthalmia isolated with coloboma 1 300471 Cubitus valgus with mental retardation and unusual facies 300484 Orofaciodigital syndrome VIII 300716 Mental retardation X-linked 95 300719 Deafness cataract retinitis pigmentosa and sperm abnormalities 300864 Cerebral-cerebellar-coloboma syndrome X-linked 309050 Lutheran suppressor X-linked 300010 A-11 gene 300074 X chromosome-controlling ele…	DLG3|0.532941322|14.46%	1CG-001|3CG-035|3CG-042|3CG-047|3CG-064|3CG-173|8CG-004
DGC	DLG3-AS1	7	100	X	q11.1|q28	300345 Microphthalmia isolated with coloboma 1 300471 Cubitus valgus with mental retardation and unusual facies 300484 Orofaciodigital syndrome VIII 300716 Mental retardation X-linked 95 300719 Deafness cataract retinitis pigmentosa and sperm abnormalities 300864 Cerebral-cerebellar-coloboma syndrome X-linked 309050 Lutheran suppressor X-linked 300010 A-11 gene 300074 X chromosome-controlling ele…	NA	1CG-001|3CG-035|3CG-042|3CG-047|3CG-064|3CG-173|8CG-004
DGC	DMD	7	100	X	p22.33|p11.1	301780 Arylsulfatase C f form 300345 Microphthalmia isolated with coloboma 1 300471 Cubitus valgus with mental retardation and unusual facies 300484 Orofaciodigital syndrome VIII 300716 Mental retardation X-linked 95 300719 Deafness cataract retinitis pigmentosa and sperm abnormalities 300864 Cerebral-cerebellar-coloboma syndrome X-linked 309050 Lutheran suppressor X-linked 301067 Family with seq…	DMD|0.999751041|0.27%	1CG-001|3CG-035|3CG-042|3CG-047|3CG-064|3CG-173|8CG-004
DGC	DMRTC1	7	100	X	q11.1|q28	300345 Microphthalmia isolated with coloboma 1 300471 Cubitus valgus with mental retardation and unusual facies 300484 Orofaciodigital syndrome VIII 300716 Mental retardation X-linked 95 300719 Deafness cataract retinitis pigmentosa and sperm abnormalities 300864 Cerebral-cerebellar-coloboma syndrome X-linked 309050 Lutheran suppressor X-linked 300010 A-11 gene 300074 X chromosome-controlling ele…	DMRTC1|0.001227511|94.29%	1CG-001|3CG-035|3CG-042|3CG-047|3CG-064|3CG-173|8CG-004
DGC	DMRTC1B	7	100	X	q11.1|q28	300345 Microphthalmia isolated with coloboma 1 300471 Cubitus valgus with mental retardation and unusual facies 300484 Orofaciodigital syndrome VIII 300716 Mental retardation X-linked 95 300719 Deafness cataract retinitis pigmentosa and sperm abnormalities 300864 Cerebral-cerebellar-coloboma syndrome X-linked 309050 Lutheran suppressor X-linked 300010 A-11 gene 300074 X chromosome-controlling ele…	DMRTC1B|0.000915345|95.94%	1CG-001|3CG-035|3CG-042|3CG-047|3CG-064|3CG-173|8CG-004
DGC	DNAAF6	7	100	X	q11.1|q28	300345 Microphthalmia isolated with coloboma 1 300471 Cubitus valgus with mental retardation and unusual facies 300484 Orofaciodigital syndrome VIII 300716 Mental retardation X-linked 95 300719 Deafness cataract retinitis pigmentosa and sperm abnormalities 300864 Cerebral-cerebellar-coloboma syndrome X-linked 309050 Lutheran suppressor X-linked 300010 A-11 gene 300074 X chromosome-controlling ele…	NA	1CG-001|3CG-035|3CG-042|3CG-047|3CG-064|3CG-173|8CG-004
DGC	DNASE1L1	7	100	X	q11.1|q28	300345 Microphthalmia isolated with coloboma 1 300471 Cubitus valgus with mental retardation and unusual facies 300484 Orofaciodigital syndrome VIII 300716 Mental retardation X-linked 95 300719 Deafness cataract retinitis pigmentosa and sperm abnormalities 300864 Cerebral-cerebellar-coloboma syndrome X-linked 309050 Lutheran suppressor X-linked 300010 A-11 gene 300074 X chromosome-controlling ele…	DNASE1L1|0.011941688|79.28%	1CG-001|3CG-035|3CG-042|3CG-047|3CG-064|3CG-173|8CG-004
DGC	DOCK11	7	100	X	q11.1|q28	300345 Microphthalmia isolated with coloboma 1 300471 Cubitus valgus with mental retardation and unusual facies 300484 Orofaciodigital syndrome VIII 300716 Mental retardation X-linked 95 300719 Deafness cataract retinitis pigmentosa and sperm abnormalities 300864 Cerebral-cerebellar-coloboma syndrome X-linked 309050 Lutheran suppressor X-linked 300010 A-11 gene 300074 X chromosome-controlling ele…	DOCK11|0.510737136|15.35%	1CG-001|3CG-035|3CG-042|3CG-047|3CG-064|3CG-173|8CG-004
DGC	DRP2	7	100	X	q11.1|q28	300345 Microphthalmia isolated with coloboma 1 300471 Cubitus valgus with mental retardation and unusual facies 300484 Orofaciodigital syndrome VIII 300716 Mental retardation X-linked 95 300719 Deafness cataract retinitis pigmentosa and sperm abnormalities 300864 Cerebral-cerebellar-coloboma syndrome X-linked 309050 Lutheran suppressor X-linked 300010 A-11 gene 300074 X chromosome-controlling ele…	DRP2|0.392002817|21.27%	1CG-001|3CG-035|3CG-042|3CG-047|3CG-064|3CG-173|8CG-004
DGC	DUSP21	7	100	X	p22.33|p11.1	301780 Arylsulfatase C f form 300345 Microphthalmia isolated with coloboma 1 300471 Cubitus valgus with mental retardation and unusual facies 300484 Orofaciodigital syndrome VIII 300716 Mental retardation X-linked 95 300719 Deafness cataract retinitis pigmentosa and sperm abnormalities 300864 Cerebral-cerebellar-coloboma syndrome X-linked 309050 Lutheran suppressor X-linked 301067 Family with seq…	DUSP21|0.002952196|88.73%	1CG-001|3CG-035|3CG-042|3CG-047|3CG-064|3CG-173|8CG-004
DGC	DUSP9	7	100	X	q11.1|q28	300345 Microphthalmia isolated with coloboma 1 300471 Cubitus valgus with mental retardation and unusual facies 300484 Orofaciodigital syndrome VIII 300716 Mental retardation X-linked 95 300719 Deafness cataract retinitis pigmentosa and sperm abnormalities 300864 Cerebral-cerebellar-coloboma syndrome X-linked 309050 Lutheran suppressor X-linked 300010 A-11 gene 300074 X chromosome-controlling ele…	DUSP9|0.053701923|61.55%	1CG-001|3CG-035|3CG-042|3CG-047|3CG-064|3CG-173|8CG-004
DGC	DYNLT3	7	100	X	p22.33|p11.1	301780 Arylsulfatase C f form 300345 Microphthalmia isolated with coloboma 1 300471 Cubitus valgus with mental retardation and unusual facies 300484 Orofaciodigital syndrome VIII 300716 Mental retardation X-linked 95 300719 Deafness cataract retinitis pigmentosa and sperm abnormalities 300864 Cerebral-cerebellar-coloboma syndrome X-linked 309050 Lutheran suppressor X-linked 301067 Family with seq…	DYNLT3|0.107397207|49.7%	1CG-001|3CG-035|3CG-042|3CG-047|3CG-064|3CG-173|8CG-004
DGC	EBP	7	100	X	p22.33|p11.1	301780 Arylsulfatase C f form 300345 Microphthalmia isolated with coloboma 1 300471 Cubitus valgus with mental retardation and unusual facies 300484 Orofaciodigital syndrome VIII 300716 Mental retardation X-linked 95 300719 Deafness cataract retinitis pigmentosa and sperm abnormalities 300864 Cerebral-cerebellar-coloboma syndrome X-linked 309050 Lutheran suppressor X-linked 301067 Family with seq…	EBP|0.065187638|58.58%	1CG-001|3CG-035|3CG-042|3CG-047|3CG-064|3CG-173|8CG-004
DGC	ECMXP	7	100	X	q11.1|q28	300345 Microphthalmia isolated with coloboma 1 300471 Cubitus valgus with mental retardation and unusual facies 300484 Orofaciodigital syndrome VIII 300716 Mental retardation X-linked 95 300719 Deafness cataract retinitis pigmentosa and sperm abnormalities 300864 Cerebral-cerebellar-coloboma syndrome X-linked 309050 Lutheran suppressor X-linked 300010 A-11 gene 300074 X chromosome-controlling ele…	NA	1CG-001|3CG-035|3CG-042|3CG-047|3CG-064|3CG-173|8CG-004
DGC	EDA	7	100	X	q11.1|q28	300345 Microphthalmia isolated with coloboma 1 300471 Cubitus valgus with mental retardation and unusual facies 300484 Orofaciodigital syndrome VIII 300716 Mental retardation X-linked 95 300719 Deafness cataract retinitis pigmentosa and sperm abnormalities 300864 Cerebral-cerebellar-coloboma syndrome X-linked 309050 Lutheran suppressor X-linked 300010 A-11 gene 300074 X chromosome-controlling ele…	EDA|0.941503971|2.43%	1CG-001|3CG-035|3CG-042|3CG-047|3CG-064|3CG-173|8CG-004
DGC	EDA2R	7	100	X	q11.1|q28	300345 Microphthalmia isolated with coloboma 1 300471 Cubitus valgus with mental retardation and unusual facies 300484 Orofaciodigital syndrome VIII 300716 Mental retardation X-linked 95 300719 Deafness cataract retinitis pigmentosa and sperm abnormalities 300864 Cerebral-cerebellar-coloboma syndrome X-linked 309050 Lutheran suppressor X-linked 300010 A-11 gene 300074 X chromosome-controlling ele…	EDA2R|0.057303601|60.61%	1CG-001|3CG-035|3CG-042|3CG-047|3CG-064|3CG-173|8CG-004
DGC	EFHC2	7	100	X	p22.33|p11.1	301780 Arylsulfatase C f form 300345 Microphthalmia isolated with coloboma 1 300471 Cubitus valgus with mental retardation and unusual facies 300484 Orofaciodigital syndrome VIII 300716 Mental retardation X-linked 95 300719 Deafness cataract retinitis pigmentosa and sperm abnormalities 300864 Cerebral-cerebellar-coloboma syndrome X-linked 309050 Lutheran suppressor X-linked 301067 Family with seq…	EFHC2|0.043626433|64.63%	1CG-001|3CG-035|3CG-042|3CG-047|3CG-064|3CG-173|8CG-004
DGC	EFNB1	7	100	X	q11.1|q28	300345 Microphthalmia isolated with coloboma 1 300471 Cubitus valgus with mental retardation and unusual facies 300484 Orofaciodigital syndrome VIII 300716 Mental retardation X-linked 95 300719 Deafness cataract retinitis pigmentosa and sperm abnormalities 300864 Cerebral-cerebellar-coloboma syndrome X-linked 309050 Lutheran suppressor X-linked 300010 A-11 gene 300074 X chromosome-controlling ele…	EFNB1|0.802000737|5.79%	1CG-001|3CG-035|3CG-042|3CG-047|3CG-064|3CG-173|8CG-004
DGC	EGFL6	7	100	X	p22.33|p11.1	301780 Arylsulfatase C f form 300345 Microphthalmia isolated with coloboma 1 300471 Cubitus valgus with mental retardation and unusual facies 300484 Orofaciodigital syndrome VIII 300716 Mental retardation X-linked 95 300719 Deafness cataract retinitis pigmentosa and sperm abnormalities 300864 Cerebral-cerebellar-coloboma syndrome X-linked 309050 Lutheran suppressor X-linked 301067 Family with seq…	EGFL6|0.043617571|64.63%	1CG-001|3CG-035|3CG-042|3CG-047|3CG-064|3CG-173|8CG-004
DGC	EIF1AX	7	100	X	p22.33|p11.1	301780 Arylsulfatase C f form 300345 Microphthalmia isolated with coloboma 1 300471 Cubitus valgus with mental retardation and unusual facies 300484 Orofaciodigital syndrome VIII 300716 Mental retardation X-linked 95 300719 Deafness cataract retinitis pigmentosa and sperm abnormalities 300864 Cerebral-cerebellar-coloboma syndrome X-linked 309050 Lutheran suppressor X-linked 301067 Family with seq…	EIF1AX|0.558244559|13.42%	1CG-001|3CG-035|3CG-042|3CG-047|3CG-064|3CG-173|8CG-004
DGC	EIF1AX-AS1	7	100	X	p22.33|p11.1	301780 Arylsulfatase C f form 300345 Microphthalmia isolated with coloboma 1 300471 Cubitus valgus with mental retardation and unusual facies 300484 Orofaciodigital syndrome VIII 300716 Mental retardation X-linked 95 300719 Deafness cataract retinitis pigmentosa and sperm abnormalities 300864 Cerebral-cerebellar-coloboma syndrome X-linked 309050 Lutheran suppressor X-linked 301067 Family with seq…	NA	1CG-001|3CG-035|3CG-042|3CG-047|3CG-064|3CG-173|8CG-004
DGC	EIF2S3	7	100	X	p22.33|p11.1	301780 Arylsulfatase C f form 300345 Microphthalmia isolated with coloboma 1 300471 Cubitus valgus with mental retardation and unusual facies 300484 Orofaciodigital syndrome VIII 300716 Mental retardation X-linked 95 300719 Deafness cataract retinitis pigmentosa and sperm abnormalities 300864 Cerebral-cerebellar-coloboma syndrome X-linked 309050 Lutheran suppressor X-linked 301067 Family with seq…	EIF2S3|0.31714361|26.3%	1CG-001|3CG-035|3CG-042|3CG-047|3CG-064|3CG-173|8CG-004
DGC	ELF4	7	100	X	q11.1|q28	300345 Microphthalmia isolated with coloboma 1 300471 Cubitus valgus with mental retardation and unusual facies 300484 Orofaciodigital syndrome VIII 300716 Mental retardation X-linked 95 300719 Deafness cataract retinitis pigmentosa and sperm abnormalities 300864 Cerebral-cerebellar-coloboma syndrome X-linked 309050 Lutheran suppressor X-linked 300010 A-11 gene 300074 X chromosome-controlling ele…	ELF4|0.110553761|49.1%	1CG-001|3CG-035|3CG-042|3CG-047|3CG-064|3CG-173|8CG-004
DGC	ELK1	7	100	X	p22.33|p11.1	301780 Arylsulfatase C f form 300345 Microphthalmia isolated with coloboma 1 300471 Cubitus valgus with mental retardation and unusual facies 300484 Orofaciodigital syndrome VIII 300716 Mental retardation X-linked 95 300719 Deafness cataract retinitis pigmentosa and sperm abnormalities 300864 Cerebral-cerebellar-coloboma syndrome X-linked 309050 Lutheran suppressor X-linked 301067 Family with seq…	ELK1|0.147382607|43.41%	1CG-001|3CG-035|3CG-042|3CG-047|3CG-064|3CG-173|8CG-004
DGC	EMD	7	100	X	q11.1|q28	300345 Microphthalmia isolated with coloboma 1 300471 Cubitus valgus with mental retardation and unusual facies 300484 Orofaciodigital syndrome VIII 300716 Mental retardation X-linked 95 300719 Deafness cataract retinitis pigmentosa and sperm abnormalities 300864 Cerebral-cerebellar-coloboma syndrome X-linked 309050 Lutheran suppressor X-linked 300010 A-11 gene 300074 X chromosome-controlling ele…	EMD|0.064408891|58.76%	1CG-001|3CG-035|3CG-042|3CG-047|3CG-064|3CG-173|8CG-004
DGC	ENOX2	7	100	X	q11.1|q28	300345 Microphthalmia isolated with coloboma 1 300471 Cubitus valgus with mental retardation and unusual facies 300484 Orofaciodigital syndrome VIII 300716 Mental retardation X-linked 95 300719 Deafness cataract retinitis pigmentosa and sperm abnormalities 300864 Cerebral-cerebellar-coloboma syndrome X-linked 309050 Lutheran suppressor X-linked 300010 A-11 gene 300074 X chromosome-controlling ele…	ENOX2|0.580447853|12.56%	1CG-001|3CG-035|3CG-042|3CG-047|3CG-064|3CG-173|8CG-004
DGC	EOLA1	7	100	X	q11.1|q28	300345 Microphthalmia isolated with coloboma 1 300471 Cubitus valgus with mental retardation and unusual facies 300484 Orofaciodigital syndrome VIII 300716 Mental retardation X-linked 95 300719 Deafness cataract retinitis pigmentosa and sperm abnormalities 300864 Cerebral-cerebellar-coloboma syndrome X-linked 309050 Lutheran suppressor X-linked 300010 A-11 gene 300074 X chromosome-controlling ele…	NA	1CG-001|3CG-035|3CG-042|3CG-047|3CG-064|3CG-173|8CG-004
DGC	EOLA2	7	100	X	q11.1|q28	300345 Microphthalmia isolated with coloboma 1 300471 Cubitus valgus with mental retardation and unusual facies 300484 Orofaciodigital syndrome VIII 300716 Mental retardation X-linked 95 300719 Deafness cataract retinitis pigmentosa and sperm abnormalities 300864 Cerebral-cerebellar-coloboma syndrome X-linked 309050 Lutheran suppressor X-linked 300010 A-11 gene 300074 X chromosome-controlling ele…	NA	1CG-001|3CG-035|3CG-042|3CG-047|3CG-064|3CG-173|8CG-004
DGC	ERAS	7	100	X	p22.33|p11.1	301780 Arylsulfatase C f form 300345 Microphthalmia isolated with coloboma 1 300471 Cubitus valgus with mental retardation and unusual facies 300484 Orofaciodigital syndrome VIII 300716 Mental retardation X-linked 95 300719 Deafness cataract retinitis pigmentosa and sperm abnormalities 300864 Cerebral-cerebellar-coloboma syndrome X-linked 309050 Lutheran suppressor X-linked 301067 Family with seq…	ERAS|0.033662733|67.89%	1CG-001|3CG-035|3CG-042|3CG-047|3CG-064|3CG-173|8CG-004
DGC	ERCC6L	7	100	X	q11.1|q28	300345 Microphthalmia isolated with coloboma 1 300471 Cubitus valgus with mental retardation and unusual facies 300484 Orofaciodigital syndrome VIII 300716 Mental retardation X-linked 95 300719 Deafness cataract retinitis pigmentosa and sperm abnormalities 300864 Cerebral-cerebellar-coloboma syndrome X-linked 309050 Lutheran suppressor X-linked 300010 A-11 gene 300074 X chromosome-controlling ele…	ERCC6L|0.100117811|51.15%	1CG-001|3CG-035|3CG-042|3CG-047|3CG-064|3CG-173|8CG-004
DGC	ESX1	7	100	X	q11.1|q28	300345 Microphthalmia isolated with coloboma 1 300471 Cubitus valgus with mental retardation and unusual facies 300484 Orofaciodigital syndrome VIII 300716 Mental retardation X-linked 95 300719 Deafness cataract retinitis pigmentosa and sperm abnormalities 300864 Cerebral-cerebellar-coloboma syndrome X-linked 309050 Lutheran suppressor X-linked 300010 A-11 gene 300074 X chromosome-controlling ele…	ESX1|0.002110231|90.71%	1CG-001|3CG-035|3CG-042|3CG-047|3CG-064|3CG-173|8CG-004
DGC	ETDA	7	100	X	q11.1|q28	300345 Microphthalmia isolated with coloboma 1 300471 Cubitus valgus with mental retardation and unusual facies 300484 Orofaciodigital syndrome VIII 300716 Mental retardation X-linked 95 300719 Deafness cataract retinitis pigmentosa and sperm abnormalities 300864 Cerebral-cerebellar-coloboma syndrome X-linked 309050 Lutheran suppressor X-linked 300010 A-11 gene 300074 X chromosome-controlling ele…	NA	1CG-001|3CG-035|3CG-042|3CG-047|3CG-064|3CG-173|8CG-004
DGC	ETDB	7	100	X	q11.1|q28	300345 Microphthalmia isolated with coloboma 1 300471 Cubitus valgus with mental retardation and unusual facies 300484 Orofaciodigital syndrome VIII 300716 Mental retardation X-linked 95 300719 Deafness cataract retinitis pigmentosa and sperm abnormalities 300864 Cerebral-cerebellar-coloboma syndrome X-linked 309050 Lutheran suppressor X-linked 300010 A-11 gene 300074 X chromosome-controlling ele…	NA	1CG-001|3CG-035|3CG-042|3CG-047|3CG-064|3CG-173|8CG-004
DGC	ETDC	7	100	X	q11.1|q28	300345 Microphthalmia isolated with coloboma 1 300471 Cubitus valgus with mental retardation and unusual facies 300484 Orofaciodigital syndrome VIII 300716 Mental retardation X-linked 95 300719 Deafness cataract retinitis pigmentosa and sperm abnormalities 300864 Cerebral-cerebellar-coloboma syndrome X-linked 309050 Lutheran suppressor X-linked 300010 A-11 gene 300074 X chromosome-controlling ele…	NA	1CG-001|3CG-035|3CG-042|3CG-047|3CG-064|3CG-173|8CG-004
DGC	EZHIP	7	100	X	p22.33|p11.1	301780 Arylsulfatase C f form 300345 Microphthalmia isolated with coloboma 1 300471 Cubitus valgus with mental retardation and unusual facies 300484 Orofaciodigital syndrome VIII 300716 Mental retardation X-linked 95 300719 Deafness cataract retinitis pigmentosa and sperm abnormalities 300864 Cerebral-cerebellar-coloboma syndrome X-linked 309050 Lutheran suppressor X-linked 301067 Family with seq…	NA	1CG-001|3CG-035|3CG-042|3CG-047|3CG-064|3CG-173|8CG-004
DGC	F8	7	100	X	q11.1|q28	300345 Microphthalmia isolated with coloboma 1 300471 Cubitus valgus with mental retardation and unusual facies 300484 Orofaciodigital syndrome VIII 300716 Mental retardation X-linked 95 300719 Deafness cataract retinitis pigmentosa and sperm abnormalities 300864 Cerebral-cerebellar-coloboma syndrome X-linked 309050 Lutheran suppressor X-linked 300010 A-11 gene 300074 X chromosome-controlling ele…	F8|0.260190683|30.72%	1CG-001|3CG-035|3CG-042|3CG-047|3CG-064|3CG-173|8CG-004
DGC	F8A1	7	100	X	q11.1|q28	300345 Microphthalmia isolated with coloboma 1 300471 Cubitus valgus with mental retardation and unusual facies 300484 Orofaciodigital syndrome VIII 300716 Mental retardation X-linked 95 300719 Deafness cataract retinitis pigmentosa and sperm abnormalities 300864 Cerebral-cerebellar-coloboma syndrome X-linked 309050 Lutheran suppressor X-linked 300010 A-11 gene 300074 X chromosome-controlling ele…	F8A1|0.007302698|83.22%	1CG-001|3CG-035|3CG-042|3CG-047|3CG-064|3CG-173|8CG-004
DGC	F8A2	7	100	X	q11.1|q28	300345 Microphthalmia isolated with coloboma 1 300471 Cubitus valgus with mental retardation and unusual facies 300484 Orofaciodigital syndrome VIII 300716 Mental retardation X-linked 95 300719 Deafness cataract retinitis pigmentosa and sperm abnormalities 300864 Cerebral-cerebellar-coloboma syndrome X-linked 309050 Lutheran suppressor X-linked 300010 A-11 gene 300074 X chromosome-controlling ele…	F8A2|0.004510097|86.39%	1CG-001|3CG-035|3CG-042|3CG-047|3CG-064|3CG-173|8CG-004
DGC	F8A3	7	100	X	q11.1|q28	300345 Microphthalmia isolated with coloboma 1 300471 Cubitus valgus with mental retardation and unusual facies 300484 Orofaciodigital syndrome VIII 300716 Mental retardation X-linked 95 300719 Deafness cataract retinitis pigmentosa and sperm abnormalities 300864 Cerebral-cerebellar-coloboma syndrome X-linked 309050 Lutheran suppressor X-linked 300010 A-11 gene 300074 X chromosome-controlling ele…	F8A3|0.003247737|88.24%	1CG-001|3CG-035|3CG-042|3CG-047|3CG-064|3CG-173|8CG-004
DGC	F9	7	100	X	q11.1|q28	300345 Microphthalmia isolated with coloboma 1 300471 Cubitus valgus with mental retardation and unusual facies 300484 Orofaciodigital syndrome VIII 300716 Mental retardation X-linked 95 300719 Deafness cataract retinitis pigmentosa and sperm abnormalities 300864 Cerebral-cerebellar-coloboma syndrome X-linked 309050 Lutheran suppressor X-linked 300010 A-11 gene 300074 X chromosome-controlling ele…	F9|0.170306612|40.27%	1CG-001|3CG-035|3CG-042|3CG-047|3CG-064|3CG-173|8CG-004
DGC	FAAH2	7	100	X	p22.33|p11.1	301780 Arylsulfatase C f form 300345 Microphthalmia isolated with coloboma 1 300471 Cubitus valgus with mental retardation and unusual facies 300484 Orofaciodigital syndrome VIII 300716 Mental retardation X-linked 95 300719 Deafness cataract retinitis pigmentosa and sperm abnormalities 300864 Cerebral-cerebellar-coloboma syndrome X-linked 309050 Lutheran suppressor X-linked 301067 Family with seq…	FAAH2|0.005909057|84.68%	1CG-001|3CG-035|3CG-042|3CG-047|3CG-064|3CG-173|8CG-004
DGC	FAM104B	7	100	X	p22.33|p11.1	301780 Arylsulfatase C f form 300345 Microphthalmia isolated with coloboma 1 300471 Cubitus valgus with mental retardation and unusual facies 300484 Orofaciodigital syndrome VIII 300716 Mental retardation X-linked 95 300719 Deafness cataract retinitis pigmentosa and sperm abnormalities 300864 Cerebral-cerebellar-coloboma syndrome X-linked 309050 Lutheran suppressor X-linked 301067 Family with seq…	FAM104B|0.001440975|93.08%	1CG-001|3CG-035|3CG-042|3CG-047|3CG-064|3CG-173|8CG-004
DGC	FAM120C	7	100	X	p22.33|p11.1	301780 Arylsulfatase C f form 300345 Microphthalmia isolated with coloboma 1 300471 Cubitus valgus with mental retardation and unusual facies 300484 Orofaciodigital syndrome VIII 300716 Mental retardation X-linked 95 300719 Deafness cataract retinitis pigmentosa and sperm abnormalities 300864 Cerebral-cerebellar-coloboma syndrome X-linked 309050 Lutheran suppressor X-linked 301067 Family with seq…	FAM120C|0.175300288|39.59%	1CG-001|3CG-035|3CG-042|3CG-047|3CG-064|3CG-173|8CG-004
DGC	FAM122B	7	100	X	q11.1|q28	300345 Microphthalmia isolated with coloboma 1 300471 Cubitus valgus with mental retardation and unusual facies 300484 Orofaciodigital syndrome VIII 300716 Mental retardation X-linked 95 300719 Deafness cataract retinitis pigmentosa and sperm abnormalities 300864 Cerebral-cerebellar-coloboma syndrome X-linked 309050 Lutheran suppressor X-linked 300010 A-11 gene 300074 X chromosome-controlling ele…	FAM122B|0.28853336|28.48%	1CG-001|3CG-035|3CG-042|3CG-047|3CG-064|3CG-173|8CG-004
DGC	FAM122C	7	100	X	q11.1|q28	300345 Microphthalmia isolated with coloboma 1 300471 Cubitus valgus with mental retardation and unusual facies 300484 Orofaciodigital syndrome VIII 300716 Mental retardation X-linked 95 300719 Deafness cataract retinitis pigmentosa and sperm abnormalities 300864 Cerebral-cerebellar-coloboma syndrome X-linked 309050 Lutheran suppressor X-linked 300010 A-11 gene 300074 X chromosome-controlling ele…	FAM122C|0.005486263|85.22%	1CG-001|3CG-035|3CG-042|3CG-047|3CG-064|3CG-173|8CG-004
DGC	FAM133A	7	100	X	q11.1|q28	300345 Microphthalmia isolated with coloboma 1 300471 Cubitus valgus with mental retardation and unusual facies 300484 Orofaciodigital syndrome VIII 300716 Mental retardation X-linked 95 300719 Deafness cataract retinitis pigmentosa and sperm abnormalities 300864 Cerebral-cerebellar-coloboma syndrome X-linked 309050 Lutheran suppressor X-linked 300010 A-11 gene 300074 X chromosome-controlling ele…	FAM133A|0.01442869|77.53%	1CG-001|3CG-035|3CG-042|3CG-047|3CG-064|3CG-173|8CG-004
DGC	FAM155B	7	100	X	q11.1|q28	300345 Microphthalmia isolated with coloboma 1 300471 Cubitus valgus with mental retardation and unusual facies 300484 Orofaciodigital syndrome VIII 300716 Mental retardation X-linked 95 300719 Deafness cataract retinitis pigmentosa and sperm abnormalities 300864 Cerebral-cerebellar-coloboma syndrome X-linked 309050 Lutheran suppressor X-linked 300010 A-11 gene 300074 X chromosome-controlling ele…	FAM155B|0.652325515|10.02%	1CG-001|3CG-035|3CG-042|3CG-047|3CG-064|3CG-173|8CG-004
DGC	FAM156A	7	100	X	p22.33|p11.1	301780 Arylsulfatase C f form 300345 Microphthalmia isolated with coloboma 1 300471 Cubitus valgus with mental retardation and unusual facies 300484 Orofaciodigital syndrome VIII 300716 Mental retardation X-linked 95 300719 Deafness cataract retinitis pigmentosa and sperm abnormalities 300864 Cerebral-cerebellar-coloboma syndrome X-linked 309050 Lutheran suppressor X-linked 301067 Family with seq…	FAM156A|0.002619424|89.44%	1CG-001|3CG-035|3CG-042|3CG-047|3CG-064|3CG-173|8CG-004
DGC	FAM156B	7	100	X	p22.33|p11.1	301780 Arylsulfatase C f form 300345 Microphthalmia isolated with coloboma 1 300471 Cubitus valgus with mental retardation and unusual facies 300484 Orofaciodigital syndrome VIII 300716 Mental retardation X-linked 95 300719 Deafness cataract retinitis pigmentosa and sperm abnormalities 300864 Cerebral-cerebellar-coloboma syndrome X-linked 309050 Lutheran suppressor X-linked 301067 Family with seq…	FAM156B|0.002815606|89%	1CG-001|3CG-035|3CG-042|3CG-047|3CG-064|3CG-173|8CG-004
DGC	FAM199X	7	100	X	q11.1|q28	300345 Microphthalmia isolated with coloboma 1 300471 Cubitus valgus with mental retardation and unusual facies 300484 Orofaciodigital syndrome VIII 300716 Mental retardation X-linked 95 300719 Deafness cataract retinitis pigmentosa and sperm abnormalities 300864 Cerebral-cerebellar-coloboma syndrome X-linked 309050 Lutheran suppressor X-linked 300010 A-11 gene 300074 X chromosome-controlling ele…	FAM199X|0.35055487|24.06%	1CG-001|3CG-035|3CG-042|3CG-047|3CG-064|3CG-173|8CG-004
DGC	FAM223A	7	100	X	q11.1|q28	300345 Microphthalmia isolated with coloboma 1 300471 Cubitus valgus with mental retardation and unusual facies 300484 Orofaciodigital syndrome VIII 300716 Mental retardation X-linked 95 300719 Deafness cataract retinitis pigmentosa and sperm abnormalities 300864 Cerebral-cerebellar-coloboma syndrome X-linked 309050 Lutheran suppressor X-linked 300010 A-11 gene 300074 X chromosome-controlling ele…	NA	1CG-001|3CG-035|3CG-042|3CG-047|3CG-064|3CG-173|8CG-004
DGC	FAM223B	7	100	X	q11.1|q28	300345 Microphthalmia isolated with coloboma 1 300471 Cubitus valgus with mental retardation and unusual facies 300484 Orofaciodigital syndrome VIII 300716 Mental retardation X-linked 95 300719 Deafness cataract retinitis pigmentosa and sperm abnormalities 300864 Cerebral-cerebellar-coloboma syndrome X-linked 309050 Lutheran suppressor X-linked 300010 A-11 gene 300074 X chromosome-controlling ele…	NA	1CG-001|3CG-035|3CG-042|3CG-047|3CG-064|3CG-173|8CG-004
DGC	FAM226A	7	100	X	q11.1|q28	300345 Microphthalmia isolated with coloboma 1 300471 Cubitus valgus with mental retardation and unusual facies 300484 Orofaciodigital syndrome VIII 300716 Mental retardation X-linked 95 300719 Deafness cataract retinitis pigmentosa and sperm abnormalities 300864 Cerebral-cerebellar-coloboma syndrome X-linked 309050 Lutheran suppressor X-linked 300010 A-11 gene 300074 X chromosome-controlling ele…	NA	1CG-001|3CG-035|3CG-042|3CG-047|3CG-064|3CG-173|8CG-004
DGC	FAM226B	7	100	X	q11.1|q28	300345 Microphthalmia isolated with coloboma 1 300471 Cubitus valgus with mental retardation and unusual facies 300484 Orofaciodigital syndrome VIII 300716 Mental retardation X-linked 95 300719 Deafness cataract retinitis pigmentosa and sperm abnormalities 300864 Cerebral-cerebellar-coloboma syndrome X-linked 309050 Lutheran suppressor X-linked 300010 A-11 gene 300074 X chromosome-controlling ele…	NA	1CG-001|3CG-035|3CG-042|3CG-047|3CG-064|3CG-173|8CG-004
DGC	FAM236A	7	100	X	q11.1|q28	300345 Microphthalmia isolated with coloboma 1 300471 Cubitus valgus with mental retardation and unusual facies 300484 Orofaciodigital syndrome VIII 300716 Mental retardation X-linked 95 300719 Deafness cataract retinitis pigmentosa and sperm abnormalities 300864 Cerebral-cerebellar-coloboma syndrome X-linked 309050 Lutheran suppressor X-linked 300010 A-11 gene 300074 X chromosome-controlling ele…	NA	1CG-001|3CG-035|3CG-042|3CG-047|3CG-064|3CG-173|8CG-004
DGC	FAM236B	7	100	X	q11.1|q28	300345 Microphthalmia isolated with coloboma 1 300471 Cubitus valgus with mental retardation and unusual facies 300484 Orofaciodigital syndrome VIII 300716 Mental retardation X-linked 95 300719 Deafness cataract retinitis pigmentosa and sperm abnormalities 300864 Cerebral-cerebellar-coloboma syndrome X-linked 309050 Lutheran suppressor X-linked 300010 A-11 gene 300074 X chromosome-controlling ele…	NA	1CG-001|3CG-035|3CG-042|3CG-047|3CG-064|3CG-173|8CG-004
DGC	FAM236C	7	100	X	q11.1|q28	300345 Microphthalmia isolated with coloboma 1 300471 Cubitus valgus with mental retardation and unusual facies 300484 Orofaciodigital syndrome VIII 300716 Mental retardation X-linked 95 300719 Deafness cataract retinitis pigmentosa and sperm abnormalities 300864 Cerebral-cerebellar-coloboma syndrome X-linked 309050 Lutheran suppressor X-linked 300010 A-11 gene 300074 X chromosome-controlling ele…	NA	1CG-001|3CG-035|3CG-042|3CG-047|3CG-064|3CG-173|8CG-004
DGC	FAM236D	7	100	X	q11.1|q28	300345 Microphthalmia isolated with coloboma 1 300471 Cubitus valgus with mental retardation and unusual facies 300484 Orofaciodigital syndrome VIII 300716 Mental retardation X-linked 95 300719 Deafness cataract retinitis pigmentosa and sperm abnormalities 300864 Cerebral-cerebellar-coloboma syndrome X-linked 309050 Lutheran suppressor X-linked 300010 A-11 gene 300074 X chromosome-controlling ele…	NA	1CG-001|3CG-035|3CG-042|3CG-047|3CG-064|3CG-173|8CG-004
DGC	FAM239A	7	100	X	p22.33|p11.1	301780 Arylsulfatase C f form 300345 Microphthalmia isolated with coloboma 1 300471 Cubitus valgus with mental retardation and unusual facies 300484 Orofaciodigital syndrome VIII 300716 Mental retardation X-linked 95 300719 Deafness cataract retinitis pigmentosa and sperm abnormalities 300864 Cerebral-cerebellar-coloboma syndrome X-linked 309050 Lutheran suppressor X-linked 301067 Family with seq…	NA	1CG-001|3CG-035|3CG-042|3CG-047|3CG-064|3CG-173|8CG-004
DGC	FAM239B	7	100	X	p22.33|p11.1	301780 Arylsulfatase C f form 300345 Microphthalmia isolated with coloboma 1 300471 Cubitus valgus with mental retardation and unusual facies 300484 Orofaciodigital syndrome VIII 300716 Mental retardation X-linked 95 300719 Deafness cataract retinitis pigmentosa and sperm abnormalities 300864 Cerebral-cerebellar-coloboma syndrome X-linked 309050 Lutheran suppressor X-linked 301067 Family with seq…	NA	1CG-001|3CG-035|3CG-042|3CG-047|3CG-064|3CG-173|8CG-004
DGC	FAM3A	7	100	X	q11.1|q28	300345 Microphthalmia isolated with coloboma 1 300471 Cubitus valgus with mental retardation and unusual facies 300484 Orofaciodigital syndrome VIII 300716 Mental retardation X-linked 95 300719 Deafness cataract retinitis pigmentosa and sperm abnormalities 300864 Cerebral-cerebellar-coloboma syndrome X-linked 309050 Lutheran suppressor X-linked 300010 A-11 gene 300074 X chromosome-controlling ele…	FAM3A|0.106980445|49.8%	1CG-001|3CG-035|3CG-042|3CG-047|3CG-064|3CG-173|8CG-004
DGC	FAM47A	7	100	X	p22.33|p11.1	301780 Arylsulfatase C f form 300345 Microphthalmia isolated with coloboma 1 300471 Cubitus valgus with mental retardation and unusual facies 300484 Orofaciodigital syndrome VIII 300716 Mental retardation X-linked 95 300719 Deafness cataract retinitis pigmentosa and sperm abnormalities 300864 Cerebral-cerebellar-coloboma syndrome X-linked 309050 Lutheran suppressor X-linked 301067 Family with seq…	FAM47A|0.000991143|95.49%	1CG-001|3CG-035|3CG-042|3CG-047|3CG-064|3CG-173|8CG-004
DGC	FAM47B	7	100	X	p22.33|p11.1	301780 Arylsulfatase C f form 300345 Microphthalmia isolated with coloboma 1 300471 Cubitus valgus with mental retardation and unusual facies 300484 Orofaciodigital syndrome VIII 300716 Mental retardation X-linked 95 300719 Deafness cataract retinitis pigmentosa and sperm abnormalities 300864 Cerebral-cerebellar-coloboma syndrome X-linked 309050 Lutheran suppressor X-linked 301067 Family with seq…	FAM47B|0.000999136|95.44%	1CG-001|3CG-035|3CG-042|3CG-047|3CG-064|3CG-173|8CG-004
DGC	FAM47C	7	100	X	p22.33|p11.1	301780 Arylsulfatase C f form 300345 Microphthalmia isolated with coloboma 1 300471 Cubitus valgus with mental retardation and unusual facies 300484 Orofaciodigital syndrome VIII 300716 Mental retardation X-linked 95 300719 Deafness cataract retinitis pigmentosa and sperm abnormalities 300864 Cerebral-cerebellar-coloboma syndrome X-linked 309050 Lutheran suppressor X-linked 301067 Family with seq…	FAM47C|0.000799995|96.66%	1CG-001|3CG-035|3CG-042|3CG-047|3CG-064|3CG-173|8CG-004
DGC	FAM50A	7	100	X	q11.1|q28	300345 Microphthalmia isolated with coloboma 1 300471 Cubitus valgus with mental retardation and unusual facies 300484 Orofaciodigital syndrome VIII 300716 Mental retardation X-linked 95 300719 Deafness cataract retinitis pigmentosa and sperm abnormalities 300864 Cerebral-cerebellar-coloboma syndrome X-linked 309050 Lutheran suppressor X-linked 300010 A-11 gene 300074 X chromosome-controlling ele…	FAM50A|0.13045268|45.82%	1CG-001|3CG-035|3CG-042|3CG-047|3CG-064|3CG-173|8CG-004
DGC	FAM9A	7	100	X	p22.33|p11.1	301780 Arylsulfatase C f form 300345 Microphthalmia isolated with coloboma 1 300471 Cubitus valgus with mental retardation and unusual facies 300484 Orofaciodigital syndrome VIII 300716 Mental retardation X-linked 95 300719 Deafness cataract retinitis pigmentosa and sperm abnormalities 300864 Cerebral-cerebellar-coloboma syndrome X-linked 309050 Lutheran suppressor X-linked 301067 Family with seq…	FAM9A|0.000808458|96.6%	1CG-001|3CG-035|3CG-042|3CG-047|3CG-064|3CG-173|8CG-004
DGC	FAM9B	7	100	X	p22.33|p11.1	301780 Arylsulfatase C f form 300345 Microphthalmia isolated with coloboma 1 300471 Cubitus valgus with mental retardation and unusual facies 300484 Orofaciodigital syndrome VIII 300716 Mental retardation X-linked 95 300719 Deafness cataract retinitis pigmentosa and sperm abnormalities 300864 Cerebral-cerebellar-coloboma syndrome X-linked 309050 Lutheran suppressor X-linked 301067 Family with seq…	FAM9B|0.001306284|93.87%	1CG-001|3CG-035|3CG-042|3CG-047|3CG-064|3CG-173|8CG-004
DGC	FAM9C	7	100	X	p22.33|p11.1	301780 Arylsulfatase C f form 300345 Microphthalmia isolated with coloboma 1 300471 Cubitus valgus with mental retardation and unusual facies 300484 Orofaciodigital syndrome VIII 300716 Mental retardation X-linked 95 300719 Deafness cataract retinitis pigmentosa and sperm abnormalities 300864 Cerebral-cerebellar-coloboma syndrome X-linked 309050 Lutheran suppressor X-linked 301067 Family with seq…	FAM9C|0.00101896|95.33%	1CG-001|3CG-035|3CG-042|3CG-047|3CG-064|3CG-173|8CG-004
DGC	FANCB	7	100	X	p22.33|p11.1	301780 Arylsulfatase C f form 300345 Microphthalmia isolated with coloboma 1 300471 Cubitus valgus with mental retardation and unusual facies 300484 Orofaciodigital syndrome VIII 300716 Mental retardation X-linked 95 300719 Deafness cataract retinitis pigmentosa and sperm abnormalities 300864 Cerebral-cerebellar-coloboma syndrome X-linked 309050 Lutheran suppressor X-linked 301067 Family with seq…	FANCB|0.07080547|57.28%	1CG-001|3CG-035|3CG-042|3CG-047|3CG-064|3CG-173|8CG-004
DGC	FATE1	7	100	X	q11.1|q28	300345 Microphthalmia isolated with coloboma 1 300471 Cubitus valgus with mental retardation and unusual facies 300484 Orofaciodigital syndrome VIII 300716 Mental retardation X-linked 95 300719 Deafness cataract retinitis pigmentosa and sperm abnormalities 300864 Cerebral-cerebellar-coloboma syndrome X-linked 309050 Lutheran suppressor X-linked 300010 A-11 gene 300074 X chromosome-controlling ele…	FATE1|0.000967268|95.68%	1CG-001|3CG-035|3CG-042|3CG-047|3CG-064|3CG-173|8CG-004
DGC	FGD1	7	100	X	p22.33|p11.1	301780 Arylsulfatase C f form 300345 Microphthalmia isolated with coloboma 1 300471 Cubitus valgus with mental retardation and unusual facies 300484 Orofaciodigital syndrome VIII 300716 Mental retardation X-linked 95 300719 Deafness cataract retinitis pigmentosa and sperm abnormalities 300864 Cerebral-cerebellar-coloboma syndrome X-linked 309050 Lutheran suppressor X-linked 301067 Family with seq…	FGD1|0.448854514|18.2%	1CG-001|3CG-035|3CG-042|3CG-047|3CG-064|3CG-173|8CG-004
DGC	FGF13	7	100	X	q11.1|q28	300345 Microphthalmia isolated with coloboma 1 300471 Cubitus valgus with mental retardation and unusual facies 300484 Orofaciodigital syndrome VIII 300716 Mental retardation X-linked 95 300719 Deafness cataract retinitis pigmentosa and sperm abnormalities 300864 Cerebral-cerebellar-coloboma syndrome X-linked 309050 Lutheran suppressor X-linked 300010 A-11 gene 300074 X chromosome-controlling ele…	FGF13|0.912569109|3.18%	1CG-001|3CG-035|3CG-042|3CG-047|3CG-064|3CG-173|8CG-004
DGC	FGF13-AS1	7	100	X	q11.1|q28	300345 Microphthalmia isolated with coloboma 1 300471 Cubitus valgus with mental retardation and unusual facies 300484 Orofaciodigital syndrome VIII 300716 Mental retardation X-linked 95 300719 Deafness cataract retinitis pigmentosa and sperm abnormalities 300864 Cerebral-cerebellar-coloboma syndrome X-linked 309050 Lutheran suppressor X-linked 300010 A-11 gene 300074 X chromosome-controlling ele…	NA	1CG-001|3CG-035|3CG-042|3CG-047|3CG-064|3CG-173|8CG-004
DGC	FGF16	7	100	X	q11.1|q28	300345 Microphthalmia isolated with coloboma 1 300471 Cubitus valgus with mental retardation and unusual facies 300484 Orofaciodigital syndrome VIII 300716 Mental retardation X-linked 95 300719 Deafness cataract retinitis pigmentosa and sperm abnormalities 300864 Cerebral-cerebellar-coloboma syndrome X-linked 309050 Lutheran suppressor X-linked 300010 A-11 gene 300074 X chromosome-controlling ele…	FGF16|0.658656357|9.77%	1CG-001|3CG-035|3CG-042|3CG-047|3CG-064|3CG-173|8CG-004
DGC	FHL1	7	100	X	q11.1|q28	300345 Microphthalmia isolated with coloboma 1 300471 Cubitus valgus with mental retardation and unusual facies 300484 Orofaciodigital syndrome VIII 300716 Mental retardation X-linked 95 300719 Deafness cataract retinitis pigmentosa and sperm abnormalities 300864 Cerebral-cerebellar-coloboma syndrome X-linked 309050 Lutheran suppressor X-linked 300010 A-11 gene 300074 X chromosome-controlling ele…	FHL1|0.568474023|13.08%	1CG-001|3CG-035|3CG-042|3CG-047|3CG-064|3CG-173|8CG-004
DGC	FIRRE	7	100	X	q11.1|q28	300345 Microphthalmia isolated with coloboma 1 300471 Cubitus valgus with mental retardation and unusual facies 300484 Orofaciodigital syndrome VIII 300716 Mental retardation X-linked 95 300719 Deafness cataract retinitis pigmentosa and sperm abnormalities 300864 Cerebral-cerebellar-coloboma syndrome X-linked 309050 Lutheran suppressor X-linked 300010 A-11 gene 300074 X chromosome-controlling ele…	NA	1CG-001|3CG-035|3CG-042|3CG-047|3CG-064|3CG-173|8CG-004
DGC	FLICR	7	100	X	p22.33|p11.1	301780 Arylsulfatase C f form 300345 Microphthalmia isolated with coloboma 1 300471 Cubitus valgus with mental retardation and unusual facies 300484 Orofaciodigital syndrome VIII 300716 Mental retardation X-linked 95 300719 Deafness cataract retinitis pigmentosa and sperm abnormalities 300864 Cerebral-cerebellar-coloboma syndrome X-linked 309050 Lutheran suppressor X-linked 301067 Family with seq…	NA	1CG-001|3CG-035|3CG-042|3CG-047|3CG-064|3CG-173|8CG-004
DGC	FLJ44635	7	100	X	q11.1|q28	300345 Microphthalmia isolated with coloboma 1 300471 Cubitus valgus with mental retardation and unusual facies 300484 Orofaciodigital syndrome VIII 300716 Mental retardation X-linked 95 300719 Deafness cataract retinitis pigmentosa and sperm abnormalities 300864 Cerebral-cerebellar-coloboma syndrome X-linked 309050 Lutheran suppressor X-linked 300010 A-11 gene 300074 X chromosome-controlling ele…	NA	1CG-001|3CG-035|3CG-042|3CG-047|3CG-064|3CG-173|8CG-004
DGC	FLNA	7	100	X	q11.1|q28	300345 Microphthalmia isolated with coloboma 1 300471 Cubitus valgus with mental retardation and unusual facies 300484 Orofaciodigital syndrome VIII 300716 Mental retardation X-linked 95 300719 Deafness cataract retinitis pigmentosa and sperm abnormalities 300864 Cerebral-cerebellar-coloboma syndrome X-linked 309050 Lutheran suppressor X-linked 300010 A-11 gene 300074 X chromosome-controlling ele…	FLNA|0.71803245|8.01%	1CG-001|3CG-035|3CG-042|3CG-047|3CG-064|3CG-173|8CG-004
DGC	FMR1	7	100	X	q11.1|q28	300345 Microphthalmia isolated with coloboma 1 300471 Cubitus valgus with mental retardation and unusual facies 300484 Orofaciodigital syndrome VIII 300716 Mental retardation X-linked 95 300719 Deafness cataract retinitis pigmentosa and sperm abnormalities 300864 Cerebral-cerebellar-coloboma syndrome X-linked 309050 Lutheran suppressor X-linked 300010 A-11 gene 300074 X chromosome-controlling ele…	FMR1|0.940937361|2.45%	1CG-001|3CG-035|3CG-042|3CG-047|3CG-064|3CG-173|8CG-004
DGC	FMR1-AS1	7	100	X	q11.1|q28	300345 Microphthalmia isolated with coloboma 1 300471 Cubitus valgus with mental retardation and unusual facies 300484 Orofaciodigital syndrome VIII 300716 Mental retardation X-linked 95 300719 Deafness cataract retinitis pigmentosa and sperm abnormalities 300864 Cerebral-cerebellar-coloboma syndrome X-linked 309050 Lutheran suppressor X-linked 300010 A-11 gene 300074 X chromosome-controlling ele…	NA	1CG-001|3CG-035|3CG-042|3CG-047|3CG-064|3CG-173|8CG-004
DGC	FMR1NB	7	100	X	q11.1|q28	300345 Microphthalmia isolated with coloboma 1 300471 Cubitus valgus with mental retardation and unusual facies 300484 Orofaciodigital syndrome VIII 300716 Mental retardation X-linked 95 300719 Deafness cataract retinitis pigmentosa and sperm abnormalities 300864 Cerebral-cerebellar-coloboma syndrome X-linked 309050 Lutheran suppressor X-linked 300010 A-11 gene 300074 X chromosome-controlling ele…	FMR1NB|0.000454015|98.67%	1CG-001|3CG-035|3CG-042|3CG-047|3CG-064|3CG-173|8CG-004
DGC	FOXO4	7	100	X	q11.1|q28	300345 Microphthalmia isolated with coloboma 1 300471 Cubitus valgus with mental retardation and unusual facies 300484 Orofaciodigital syndrome VIII 300716 Mental retardation X-linked 95 300719 Deafness cataract retinitis pigmentosa and sperm abnormalities 300864 Cerebral-cerebellar-coloboma syndrome X-linked 309050 Lutheran suppressor X-linked 300010 A-11 gene 300074 X chromosome-controlling ele…	FOXO4|0.64424919|10.31%	1CG-001|3CG-035|3CG-042|3CG-047|3CG-064|3CG-173|8CG-004
DGC	FOXP3	7	100	X	p22.33|p11.1	301780 Arylsulfatase C f form 300345 Microphthalmia isolated with coloboma 1 300471 Cubitus valgus with mental retardation and unusual facies 300484 Orofaciodigital syndrome VIII 300716 Mental retardation X-linked 95 300719 Deafness cataract retinitis pigmentosa and sperm abnormalities 300864 Cerebral-cerebellar-coloboma syndrome X-linked 309050 Lutheran suppressor X-linked 301067 Family with seq…	FOXP3|0.61779401|11.16%	1CG-001|3CG-035|3CG-042|3CG-047|3CG-064|3CG-173|8CG-004
DGC	FOXR2	7	100	X	p22.33|p11.1	301780 Arylsulfatase C f form 300345 Microphthalmia isolated with coloboma 1 300471 Cubitus valgus with mental retardation and unusual facies 300484 Orofaciodigital syndrome VIII 300716 Mental retardation X-linked 95 300719 Deafness cataract retinitis pigmentosa and sperm abnormalities 300864 Cerebral-cerebellar-coloboma syndrome X-linked 309050 Lutheran suppressor X-linked 301067 Family with seq…	FOXR2|0.00232069|90.12%	1CG-001|3CG-035|3CG-042|3CG-047|3CG-064|3CG-173|8CG-004
DGC	FRMD7	7	100	X	q11.1|q28	300345 Microphthalmia isolated with coloboma 1 300471 Cubitus valgus with mental retardation and unusual facies 300484 Orofaciodigital syndrome VIII 300716 Mental retardation X-linked 95 300719 Deafness cataract retinitis pigmentosa and sperm abnormalities 300864 Cerebral-cerebellar-coloboma syndrome X-linked 309050 Lutheran suppressor X-linked 300010 A-11 gene 300074 X chromosome-controlling ele…	FRMD7|0.288627702|28.47%	1CG-001|3CG-035|3CG-042|3CG-047|3CG-064|3CG-173|8CG-004
DGC	FRMD8P1	7	100	X	q11.1|q28	300345 Microphthalmia isolated with coloboma 1 300471 Cubitus valgus with mental retardation and unusual facies 300484 Orofaciodigital syndrome VIII 300716 Mental retardation X-linked 95 300719 Deafness cataract retinitis pigmentosa and sperm abnormalities 300864 Cerebral-cerebellar-coloboma syndrome X-linked 309050 Lutheran suppressor X-linked 300010 A-11 gene 300074 X chromosome-controlling ele…	NA	1CG-001|3CG-035|3CG-042|3CG-047|3CG-064|3CG-173|8CG-004
DGC	FRMPD3	7	100	X	q11.1|q28	300345 Microphthalmia isolated with coloboma 1 300471 Cubitus valgus with mental retardation and unusual facies 300484 Orofaciodigital syndrome VIII 300716 Mental retardation X-linked 95 300719 Deafness cataract retinitis pigmentosa and sperm abnormalities 300864 Cerebral-cerebellar-coloboma syndrome X-linked 309050 Lutheran suppressor X-linked 300010 A-11 gene 300074 X chromosome-controlling ele…	FRMPD3|0.14787195|43.32%	1CG-001|3CG-035|3CG-042|3CG-047|3CG-064|3CG-173|8CG-004
DGC	FRMPD3-AS1	7	100	X	q11.1|q28	300345 Microphthalmia isolated with coloboma 1 300471 Cubitus valgus with mental retardation and unusual facies 300484 Orofaciodigital syndrome VIII 300716 Mental retardation X-linked 95 300719 Deafness cataract retinitis pigmentosa and sperm abnormalities 300864 Cerebral-cerebellar-coloboma syndrome X-linked 309050 Lutheran suppressor X-linked 300010 A-11 gene 300074 X chromosome-controlling ele…	NA	1CG-001|3CG-035|3CG-042|3CG-047|3CG-064|3CG-173|8CG-004
DGC	FRMPD4	7	100	X	p22.33|p11.1	301780 Arylsulfatase C f form 300345 Microphthalmia isolated with coloboma 1 300471 Cubitus valgus with mental retardation and unusual facies 300484 Orofaciodigital syndrome VIII 300716 Mental retardation X-linked 95 300719 Deafness cataract retinitis pigmentosa and sperm abnormalities 300864 Cerebral-cerebellar-coloboma syndrome X-linked 309050 Lutheran suppressor X-linked 301067 Family with seq…	FRMPD4|0.326594938|25.72%	1CG-001|3CG-035|3CG-042|3CG-047|3CG-064|3CG-173|8CG-004
DGC	FTHL17	7	100	X	p22.33|p11.1	301780 Arylsulfatase C f form 300345 Microphthalmia isolated with coloboma 1 300471 Cubitus valgus with mental retardation and unusual facies 300484 Orofaciodigital syndrome VIII 300716 Mental retardation X-linked 95 300719 Deafness cataract retinitis pigmentosa and sperm abnormalities 300864 Cerebral-cerebellar-coloboma syndrome X-linked 309050 Lutheran suppressor X-linked 301067 Family with seq…	FTHL17|0.000637657|97.63%	1CG-001|3CG-035|3CG-042|3CG-047|3CG-064|3CG-173|8CG-004
DGC	FTHL18	7	100	X	p22.33|p11.1	301780 Arylsulfatase C f form 300345 Microphthalmia isolated with coloboma 1 300471 Cubitus valgus with mental retardation and unusual facies 300484 Orofaciodigital syndrome VIII 300716 Mental retardation X-linked 95 300719 Deafness cataract retinitis pigmentosa and sperm abnormalities 300864 Cerebral-cerebellar-coloboma syndrome X-linked 309050 Lutheran suppressor X-linked 301067 Family with seq…	NA	1CG-001|3CG-035|3CG-042|3CG-047|3CG-064|3CG-173|8CG-004
DGC	FTSJ1	7	100	X	p22.33|p11.1	301780 Arylsulfatase C f form 300345 Microphthalmia isolated with coloboma 1 300471 Cubitus valgus with mental retardation and unusual facies 300484 Orofaciodigital syndrome VIII 300716 Mental retardation X-linked 95 300719 Deafness cataract retinitis pigmentosa and sperm abnormalities 300864 Cerebral-cerebellar-coloboma syndrome X-linked 309050 Lutheran suppressor X-linked 301067 Family with seq…	FTSJ1|0.092288044|52.75%	1CG-001|3CG-035|3CG-042|3CG-047|3CG-064|3CG-173|8CG-004
DGC	FTX	7	100	X	q11.1|q28	300345 Microphthalmia isolated with coloboma 1 300471 Cubitus valgus with mental retardation and unusual facies 300484 Orofaciodigital syndrome VIII 300716 Mental retardation X-linked 95 300719 Deafness cataract retinitis pigmentosa and sperm abnormalities 300864 Cerebral-cerebellar-coloboma syndrome X-linked 309050 Lutheran suppressor X-linked 300010 A-11 gene 300074 X chromosome-controlling ele…	NA	1CG-001|3CG-035|3CG-042|3CG-047|3CG-064|3CG-173|8CG-004
DGC	FUNDC1	7	100	X	p22.33|p11.1	301780 Arylsulfatase C f form 300345 Microphthalmia isolated with coloboma 1 300471 Cubitus valgus with mental retardation and unusual facies 300484 Orofaciodigital syndrome VIII 300716 Mental retardation X-linked 95 300719 Deafness cataract retinitis pigmentosa and sperm abnormalities 300864 Cerebral-cerebellar-coloboma syndrome X-linked 309050 Lutheran suppressor X-linked 301067 Family with seq…	FUNDC1|0.576585682|12.75%	1CG-001|3CG-035|3CG-042|3CG-047|3CG-064|3CG-173|8CG-004
DGC	FUNDC2	7	100	X	q11.1|q28	300345 Microphthalmia isolated with coloboma 1 300471 Cubitus valgus with mental retardation and unusual facies 300484 Orofaciodigital syndrome VIII 300716 Mental retardation X-linked 95 300719 Deafness cataract retinitis pigmentosa and sperm abnormalities 300864 Cerebral-cerebellar-coloboma syndrome X-linked 309050 Lutheran suppressor X-linked 300010 A-11 gene 300074 X chromosome-controlling ele…	FUNDC2|0.104863645|50.26%	1CG-001|3CG-035|3CG-042|3CG-047|3CG-064|3CG-173|8CG-004
DGC	G6PD	7	100	X	q11.1|q28	300345 Microphthalmia isolated with coloboma 1 300471 Cubitus valgus with mental retardation and unusual facies 300484 Orofaciodigital syndrome VIII 300716 Mental retardation X-linked 95 300719 Deafness cataract retinitis pigmentosa and sperm abnormalities 300864 Cerebral-cerebellar-coloboma syndrome X-linked 309050 Lutheran suppressor X-linked 300010 A-11 gene 300074 X chromosome-controlling ele…	G6PD|0.540907|14.16%	1CG-001|3CG-035|3CG-042|3CG-047|3CG-064|3CG-173|8CG-004
DGC	GAB3	7	100	X	q11.1|q28	300345 Microphthalmia isolated with coloboma 1 300471 Cubitus valgus with mental retardation and unusual facies 300484 Orofaciodigital syndrome VIII 300716 Mental retardation X-linked 95 300719 Deafness cataract retinitis pigmentosa and sperm abnormalities 300864 Cerebral-cerebellar-coloboma syndrome X-linked 309050 Lutheran suppressor X-linked 300010 A-11 gene 300074 X chromosome-controlling ele…	GAB3|0.03592143|67.15%	1CG-001|3CG-035|3CG-042|3CG-047|3CG-064|3CG-173|8CG-004
DGC	GABRA3	7	100	X	q11.1|q28	300345 Microphthalmia isolated with coloboma 1 300471 Cubitus valgus with mental retardation and unusual facies 300484 Orofaciodigital syndrome VIII 300716 Mental retardation X-linked 95 300719 Deafness cataract retinitis pigmentosa and sperm abnormalities 300864 Cerebral-cerebellar-coloboma syndrome X-linked 309050 Lutheran suppressor X-linked 300010 A-11 gene 300074 X chromosome-controlling ele…	GABRA3|0.292033893|28.22%	1CG-001|3CG-035|3CG-042|3CG-047|3CG-064|3CG-173|8CG-004
DGC	GABRE	7	100	X	q11.1|q28	300345 Microphthalmia isolated with coloboma 1 300471 Cubitus valgus with mental retardation and unusual facies 300484 Orofaciodigital syndrome VIII 300716 Mental retardation X-linked 95 300719 Deafness cataract retinitis pigmentosa and sperm abnormalities 300864 Cerebral-cerebellar-coloboma syndrome X-linked 309050 Lutheran suppressor X-linked 300010 A-11 gene 300074 X chromosome-controlling ele…	GABRE|0.027020862|70.86%	1CG-001|3CG-035|3CG-042|3CG-047|3CG-064|3CG-173|8CG-004
DGC	GABRQ	7	100	X	q11.1|q28	300345 Microphthalmia isolated with coloboma 1 300471 Cubitus valgus with mental retardation and unusual facies 300484 Orofaciodigital syndrome VIII 300716 Mental retardation X-linked 95 300719 Deafness cataract retinitis pigmentosa and sperm abnormalities 300864 Cerebral-cerebellar-coloboma syndrome X-linked 309050 Lutheran suppressor X-linked 300010 A-11 gene 300074 X chromosome-controlling ele…	GABRQ|0.013640362|78.1%	1CG-001|3CG-035|3CG-042|3CG-047|3CG-064|3CG-173|8CG-004
DGC	GAGE1	7	100	X	p22.33|p11.1	301780 Arylsulfatase C f form 300345 Microphthalmia isolated with coloboma 1 300471 Cubitus valgus with mental retardation and unusual facies 300484 Orofaciodigital syndrome VIII 300716 Mental retardation X-linked 95 300719 Deafness cataract retinitis pigmentosa and sperm abnormalities 300864 Cerebral-cerebellar-coloboma syndrome X-linked 309050 Lutheran suppressor X-linked 301067 Family with seq…	GAGE1|0.000833243|96.48%	1CG-001|3CG-035|3CG-042|3CG-047|3CG-064|3CG-173|8CG-004
DGC	GAGE10	7	100	X	p22.33|p11.1	301780 Arylsulfatase C f form 300345 Microphthalmia isolated with coloboma 1 300471 Cubitus valgus with mental retardation and unusual facies 300484 Orofaciodigital syndrome VIII 300716 Mental retardation X-linked 95 300719 Deafness cataract retinitis pigmentosa and sperm abnormalities 300864 Cerebral-cerebellar-coloboma syndrome X-linked 309050 Lutheran suppressor X-linked 301067 Family with seq…	GAGE10|0.000811679|96.57%	1CG-001|3CG-035|3CG-042|3CG-047|3CG-064|3CG-173|8CG-004
DGC	GAGE12B	7	100	X	p22.33|p11.1	301780 Arylsulfatase C f form 300345 Microphthalmia isolated with coloboma 1 300471 Cubitus valgus with mental retardation and unusual facies 300484 Orofaciodigital syndrome VIII 300716 Mental retardation X-linked 95 300719 Deafness cataract retinitis pigmentosa and sperm abnormalities 300864 Cerebral-cerebellar-coloboma syndrome X-linked 309050 Lutheran suppressor X-linked 301067 Family with seq…	GAGE12B|0.000871018|96.21%	1CG-001|3CG-035|3CG-042|3CG-047|3CG-064|3CG-173|8CG-004
DGC	GAGE12C	7	100	X	p22.33|p11.1	301780 Arylsulfatase C f form 300345 Microphthalmia isolated with coloboma 1 300471 Cubitus valgus with mental retardation and unusual facies 300484 Orofaciodigital syndrome VIII 300716 Mental retardation X-linked 95 300719 Deafness cataract retinitis pigmentosa and sperm abnormalities 300864 Cerebral-cerebellar-coloboma syndrome X-linked 309050 Lutheran suppressor X-linked 301067 Family with seq…	GAGE12C|0.000742297|97.06%	1CG-001|3CG-035|3CG-042|3CG-047|3CG-064|3CG-173|8CG-004
DGC	GAGE12D	7	100	X	p22.33|p11.1	301780 Arylsulfatase C f form 300345 Microphthalmia isolated with coloboma 1 300471 Cubitus valgus with mental retardation and unusual facies 300484 Orofaciodigital syndrome VIII 300716 Mental retardation X-linked 95 300719 Deafness cataract retinitis pigmentosa and sperm abnormalities 300864 Cerebral-cerebellar-coloboma syndrome X-linked 309050 Lutheran suppressor X-linked 301067 Family with seq…	GAGE12D|0.000776951|96.82%	1CG-001|3CG-035|3CG-042|3CG-047|3CG-064|3CG-173|8CG-004
DGC	GAGE12E	7	100	X	p22.33|p11.1	301780 Arylsulfatase C f form 300345 Microphthalmia isolated with coloboma 1 300471 Cubitus valgus with mental retardation and unusual facies 300484 Orofaciodigital syndrome VIII 300716 Mental retardation X-linked 95 300719 Deafness cataract retinitis pigmentosa and sperm abnormalities 300864 Cerebral-cerebellar-coloboma syndrome X-linked 309050 Lutheran suppressor X-linked 301067 Family with seq…	GAGE12E|0.001028189|95.25%	1CG-001|3CG-035|3CG-042|3CG-047|3CG-064|3CG-173|8CG-004
DGC	GAGE12F	7	100	X	p22.33|p11.1	301780 Arylsulfatase C f form 300345 Microphthalmia isolated with coloboma 1 300471 Cubitus valgus with mental retardation and unusual facies 300484 Orofaciodigital syndrome VIII 300716 Mental retardation X-linked 95 300719 Deafness cataract retinitis pigmentosa and sperm abnormalities 300864 Cerebral-cerebellar-coloboma syndrome X-linked 309050 Lutheran suppressor X-linked 301067 Family with seq…	GAGE12F|0.001044203|95.2%	1CG-001|3CG-035|3CG-042|3CG-047|3CG-064|3CG-173|8CG-004
DGC	GAGE12G	7	100	X	p22.33|p11.1	301780 Arylsulfatase C f form 300345 Microphthalmia isolated with coloboma 1 300471 Cubitus valgus with mental retardation and unusual facies 300484 Orofaciodigital syndrome VIII 300716 Mental retardation X-linked 95 300719 Deafness cataract retinitis pigmentosa and sperm abnormalities 300864 Cerebral-cerebellar-coloboma syndrome X-linked 309050 Lutheran suppressor X-linked 301067 Family with seq…	GAGE12G|0.000857317|96.32%	1CG-001|3CG-035|3CG-042|3CG-047|3CG-064|3CG-173|8CG-004
DGC	GAGE12H	7	100	X	p22.33|p11.1	301780 Arylsulfatase C f form 300345 Microphthalmia isolated with coloboma 1 300471 Cubitus valgus with mental retardation and unusual facies 300484 Orofaciodigital syndrome VIII 300716 Mental retardation X-linked 95 300719 Deafness cataract retinitis pigmentosa and sperm abnormalities 300864 Cerebral-cerebellar-coloboma syndrome X-linked 309050 Lutheran suppressor X-linked 301067 Family with seq…	GAGE12H|0.000799782|96.66%	1CG-001|3CG-035|3CG-042|3CG-047|3CG-064|3CG-173|8CG-004
DGC	GAGE12I	7	100	X	p22.33|p11.1	301780 Arylsulfatase C f form 300345 Microphthalmia isolated with coloboma 1 300471 Cubitus valgus with mental retardation and unusual facies 300484 Orofaciodigital syndrome VIII 300716 Mental retardation X-linked 95 300719 Deafness cataract retinitis pigmentosa and sperm abnormalities 300864 Cerebral-cerebellar-coloboma syndrome X-linked 309050 Lutheran suppressor X-linked 301067 Family with seq…	GAGE12I|0.000791892|96.69%	1CG-001|3CG-035|3CG-042|3CG-047|3CG-064|3CG-173|8CG-004
DGC	GAGE12J	7	100	X	p22.33|p11.1	301780 Arylsulfatase C f form 300345 Microphthalmia isolated with coloboma 1 300471 Cubitus valgus with mental retardation and unusual facies 300484 Orofaciodigital syndrome VIII 300716 Mental retardation X-linked 95 300719 Deafness cataract retinitis pigmentosa and sperm abnormalities 300864 Cerebral-cerebellar-coloboma syndrome X-linked 309050 Lutheran suppressor X-linked 301067 Family with seq…	GAGE12J|0.000833405|96.48%	1CG-001|3CG-035|3CG-042|3CG-047|3CG-064|3CG-173|8CG-004
DGC	GAGE13	7	100	X	p22.33|p11.1	301780 Arylsulfatase C f form 300345 Microphthalmia isolated with coloboma 1 300471 Cubitus valgus with mental retardation and unusual facies 300484 Orofaciodigital syndrome VIII 300716 Mental retardation X-linked 95 300719 Deafness cataract retinitis pigmentosa and sperm abnormalities 300864 Cerebral-cerebellar-coloboma syndrome X-linked 309050 Lutheran suppressor X-linked 301067 Family with seq…	GAGE13|0.00086395|96.26%	1CG-001|3CG-035|3CG-042|3CG-047|3CG-064|3CG-173|8CG-004
DGC	GAGE2A	7	100	X	p22.33|p11.1	301780 Arylsulfatase C f form 300345 Microphthalmia isolated with coloboma 1 300471 Cubitus valgus with mental retardation and unusual facies 300484 Orofaciodigital syndrome VIII 300716 Mental retardation X-linked 95 300719 Deafness cataract retinitis pigmentosa and sperm abnormalities 300864 Cerebral-cerebellar-coloboma syndrome X-linked 309050 Lutheran suppressor X-linked 301067 Family with seq…	GAGE2A|0.000603766|97.94%	1CG-001|3CG-035|3CG-042|3CG-047|3CG-064|3CG-173|8CG-004
DGC	GAGE2B	7	100	X	p22.33|p11.1	301780 Arylsulfatase C f form 300345 Microphthalmia isolated with coloboma 1 300471 Cubitus valgus with mental retardation and unusual facies 300484 Orofaciodigital syndrome VIII 300716 Mental retardation X-linked 95 300719 Deafness cataract retinitis pigmentosa and sperm abnormalities 300864 Cerebral-cerebellar-coloboma syndrome X-linked 309050 Lutheran suppressor X-linked 301067 Family with seq…	GAGE2B|0.000802682|96.63%	1CG-001|3CG-035|3CG-042|3CG-047|3CG-064|3CG-173|8CG-004
DGC	GAGE2C	7	100	X	p22.33|p11.1	301780 Arylsulfatase C f form 300345 Microphthalmia isolated with coloboma 1 300471 Cubitus valgus with mental retardation and unusual facies 300484 Orofaciodigital syndrome VIII 300716 Mental retardation X-linked 95 300719 Deafness cataract retinitis pigmentosa and sperm abnormalities 300864 Cerebral-cerebellar-coloboma syndrome X-linked 309050 Lutheran suppressor X-linked 301067 Family with seq…	GAGE2C|0.001154374|94.7%	1CG-001|3CG-035|3CG-042|3CG-047|3CG-064|3CG-173|8CG-004
DGC	GAGE2D	7	100	X	p22.33|p11.1	301780 Arylsulfatase C f form 300345 Microphthalmia isolated with coloboma 1 300471 Cubitus valgus with mental retardation and unusual facies 300484 Orofaciodigital syndrome VIII 300716 Mental retardation X-linked 95 300719 Deafness cataract retinitis pigmentosa and sperm abnormalities 300864 Cerebral-cerebellar-coloboma syndrome X-linked 309050 Lutheran suppressor X-linked 301067 Family with seq…	GAGE2D|0.000970619|95.65%	1CG-001|3CG-035|3CG-042|3CG-047|3CG-064|3CG-173|8CG-004
DGC	GAGE2E	7	100	X	p22.33|p11.1	301780 Arylsulfatase C f form 300345 Microphthalmia isolated with coloboma 1 300471 Cubitus valgus with mental retardation and unusual facies 300484 Orofaciodigital syndrome VIII 300716 Mental retardation X-linked 95 300719 Deafness cataract retinitis pigmentosa and sperm abnormalities 300864 Cerebral-cerebellar-coloboma syndrome X-linked 309050 Lutheran suppressor X-linked 301067 Family with seq…	GAGE2E|0.000743053|97.06%	1CG-001|3CG-035|3CG-042|3CG-047|3CG-064|3CG-173|8CG-004
DGC	GAGE4	7	100	X	p22.33|p11.1	301780 Arylsulfatase C f form 300345 Microphthalmia isolated with coloboma 1 300471 Cubitus valgus with mental retardation and unusual facies 300484 Orofaciodigital syndrome VIII 300716 Mental retardation X-linked 95 300719 Deafness cataract retinitis pigmentosa and sperm abnormalities 300864 Cerebral-cerebellar-coloboma syndrome X-linked 309050 Lutheran suppressor X-linked 301067 Family with seq…	NA	1CG-001|3CG-035|3CG-042|3CG-047|3CG-064|3CG-173|8CG-004
DGC	GAGE5	7	100	X	p22.33|p11.1	301780 Arylsulfatase C f form 300345 Microphthalmia isolated with coloboma 1 300471 Cubitus valgus with mental retardation and unusual facies 300484 Orofaciodigital syndrome VIII 300716 Mental retardation X-linked 95 300719 Deafness cataract retinitis pigmentosa and sperm abnormalities 300864 Cerebral-cerebellar-coloboma syndrome X-linked 309050 Lutheran suppressor X-linked 301067 Family with seq…	NA	1CG-001|3CG-035|3CG-042|3CG-047|3CG-064|3CG-173|8CG-004
DGC	GAGE6	7	100	X	p22.33|p11.1	301780 Arylsulfatase C f form 300345 Microphthalmia isolated with coloboma 1 300471 Cubitus valgus with mental retardation and unusual facies 300484 Orofaciodigital syndrome VIII 300716 Mental retardation X-linked 95 300719 Deafness cataract retinitis pigmentosa and sperm abnormalities 300864 Cerebral-cerebellar-coloboma syndrome X-linked 309050 Lutheran suppressor X-linked 301067 Family with seq…	NA	1CG-001|3CG-035|3CG-042|3CG-047|3CG-064|3CG-173|8CG-004
DGC	GAGE7	7	100	X	p22.33|p11.1	301780 Arylsulfatase C f form 300345 Microphthalmia isolated with coloboma 1 300471 Cubitus valgus with mental retardation and unusual facies 300484 Orofaciodigital syndrome VIII 300716 Mental retardation X-linked 95 300719 Deafness cataract retinitis pigmentosa and sperm abnormalities 300864 Cerebral-cerebellar-coloboma syndrome X-linked 309050 Lutheran suppressor X-linked 301067 Family with seq…	NA	1CG-001|3CG-035|3CG-042|3CG-047|3CG-064|3CG-173|8CG-004
DGC	GAGE8	7	100	X	p22.33|p11.1	301780 Arylsulfatase C f form 300345 Microphthalmia isolated with coloboma 1 300471 Cubitus valgus with mental retardation and unusual facies 300484 Orofaciodigital syndrome VIII 300716 Mental retardation X-linked 95 300719 Deafness cataract retinitis pigmentosa and sperm abnormalities 300864 Cerebral-cerebellar-coloboma syndrome X-linked 309050 Lutheran suppressor X-linked 301067 Family with seq…	NA	1CG-001|3CG-035|3CG-042|3CG-047|3CG-064|3CG-173|8CG-004
DGC	GATA1	7	100	X	p22.33|p11.1	301780 Arylsulfatase C f form 300345 Microphthalmia isolated with coloboma 1 300471 Cubitus valgus with mental retardation and unusual facies 300484 Orofaciodigital syndrome VIII 300716 Mental retardation X-linked 95 300719 Deafness cataract retinitis pigmentosa and sperm abnormalities 300864 Cerebral-cerebellar-coloboma syndrome X-linked 309050 Lutheran suppressor X-linked 301067 Family with seq…	GATA1|0.132078581|45.59%	1CG-001|3CG-035|3CG-042|3CG-047|3CG-064|3CG-173|8CG-004
DGC	GCNA	7	100	X	q11.1|q28	300345 Microphthalmia isolated with coloboma 1 300471 Cubitus valgus with mental retardation and unusual facies 300484 Orofaciodigital syndrome VIII 300716 Mental retardation X-linked 95 300719 Deafness cataract retinitis pigmentosa and sperm abnormalities 300864 Cerebral-cerebellar-coloboma syndrome X-linked 309050 Lutheran suppressor X-linked 300010 A-11 gene 300074 X chromosome-controlling ele…	NA	1CG-001|3CG-035|3CG-042|3CG-047|3CG-064|3CG-173|8CG-004
DGC	GDI1	7	100	X	q11.1|q28	300345 Microphthalmia isolated with coloboma 1 300471 Cubitus valgus with mental retardation and unusual facies 300484 Orofaciodigital syndrome VIII 300716 Mental retardation X-linked 95 300719 Deafness cataract retinitis pigmentosa and sperm abnormalities 300864 Cerebral-cerebellar-coloboma syndrome X-linked 309050 Lutheran suppressor X-linked 300010 A-11 gene 300074 X chromosome-controlling ele…	GDI1|0.264243897|30.35%	1CG-001|3CG-035|3CG-042|3CG-047|3CG-064|3CG-173|8CG-004
DGC	GDPD2	7	100	X	q11.1|q28	300345 Microphthalmia isolated with coloboma 1 300471 Cubitus valgus with mental retardation and unusual facies 300484 Orofaciodigital syndrome VIII 300716 Mental retardation X-linked 95 300719 Deafness cataract retinitis pigmentosa and sperm abnormalities 300864 Cerebral-cerebellar-coloboma syndrome X-linked 309050 Lutheran suppressor X-linked 300010 A-11 gene 300074 X chromosome-controlling ele…	GDPD2|0.107206407|49.75%	1CG-001|3CG-035|3CG-042|3CG-047|3CG-064|3CG-173|8CG-004
DGC	GEMIN8	7	100	X	p22.33|p11.1	301780 Arylsulfatase C f form 300345 Microphthalmia isolated with coloboma 1 300471 Cubitus valgus with mental retardation and unusual facies 300484 Orofaciodigital syndrome VIII 300716 Mental retardation X-linked 95 300719 Deafness cataract retinitis pigmentosa and sperm abnormalities 300864 Cerebral-cerebellar-coloboma syndrome X-linked 309050 Lutheran suppressor X-linked 301067 Family with seq…	GEMIN8|0.005467659|85.25%	1CG-001|3CG-035|3CG-042|3CG-047|3CG-064|3CG-173|8CG-004
DGC	GJB1	7	100	X	q11.1|q28	300345 Microphthalmia isolated with coloboma 1 300471 Cubitus valgus with mental retardation and unusual facies 300484 Orofaciodigital syndrome VIII 300716 Mental retardation X-linked 95 300719 Deafness cataract retinitis pigmentosa and sperm abnormalities 300864 Cerebral-cerebellar-coloboma syndrome X-linked 309050 Lutheran suppressor X-linked 300010 A-11 gene 300074 X chromosome-controlling ele…	GJB1|0.376049309|22.31%	1CG-001|3CG-035|3CG-042|3CG-047|3CG-064|3CG-173|8CG-004
DGC	GK	7	100	X	p22.33|p11.1	301780 Arylsulfatase C f form 300345 Microphthalmia isolated with coloboma 1 300471 Cubitus valgus with mental retardation and unusual facies 300484 Orofaciodigital syndrome VIII 300716 Mental retardation X-linked 95 300719 Deafness cataract retinitis pigmentosa and sperm abnormalities 300864 Cerebral-cerebellar-coloboma syndrome X-linked 309050 Lutheran suppressor X-linked 301067 Family with seq…	GK|0.598724952|11.79%	1CG-001|3CG-035|3CG-042|3CG-047|3CG-064|3CG-173|8CG-004
DGC	GLA	7	100	X	q11.1|q28	300345 Microphthalmia isolated with coloboma 1 300471 Cubitus valgus with mental retardation and unusual facies 300484 Orofaciodigital syndrome VIII 300716 Mental retardation X-linked 95 300719 Deafness cataract retinitis pigmentosa and sperm abnormalities 300864 Cerebral-cerebellar-coloboma syndrome X-linked 309050 Lutheran suppressor X-linked 300010 A-11 gene 300074 X chromosome-controlling ele…	GLA|0.154719766|42.34%	1CG-001|3CG-035|3CG-042|3CG-047|3CG-064|3CG-173|8CG-004
DGC	GLOD5	7	100	X	p22.33|p11.1	301780 Arylsulfatase C f form 300345 Microphthalmia isolated with coloboma 1 300471 Cubitus valgus with mental retardation and unusual facies 300484 Orofaciodigital syndrome VIII 300716 Mental retardation X-linked 95 300719 Deafness cataract retinitis pigmentosa and sperm abnormalities 300864 Cerebral-cerebellar-coloboma syndrome X-linked 309050 Lutheran suppressor X-linked 301067 Family with seq…	GLOD5|0.084525485|54.32%	1CG-001|3CG-035|3CG-042|3CG-047|3CG-064|3CG-173|8CG-004
DGC	GLRA2	7	100	X	p22.33|p11.1	301780 Arylsulfatase C f form 300345 Microphthalmia isolated with coloboma 1 300471 Cubitus valgus with mental retardation and unusual facies 300484 Orofaciodigital syndrome VIII 300716 Mental retardation X-linked 95 300719 Deafness cataract retinitis pigmentosa and sperm abnormalities 300864 Cerebral-cerebellar-coloboma syndrome X-linked 309050 Lutheran suppressor X-linked 301067 Family with seq…	GLRA2|0.579582995|12.61%	1CG-001|3CG-035|3CG-042|3CG-047|3CG-064|3CG-173|8CG-004
DGC	GLRA4	7	100	X	q11.1|q28	300345 Microphthalmia isolated with coloboma 1 300471 Cubitus valgus with mental retardation and unusual facies 300484 Orofaciodigital syndrome VIII 300716 Mental retardation X-linked 95 300719 Deafness cataract retinitis pigmentosa and sperm abnormalities 300864 Cerebral-cerebellar-coloboma syndrome X-linked 309050 Lutheran suppressor X-linked 300010 A-11 gene 300074 X chromosome-controlling ele…	GLRA4|0.424767211|19.36%	1CG-001|3CG-035|3CG-042|3CG-047|3CG-064|3CG-173|8CG-004
DGC	GLUD2	7	100	X	q11.1|q28	300345 Microphthalmia isolated with coloboma 1 300471 Cubitus valgus with mental retardation and unusual facies 300484 Orofaciodigital syndrome VIII 300716 Mental retardation X-linked 95 300719 Deafness cataract retinitis pigmentosa and sperm abnormalities 300864 Cerebral-cerebellar-coloboma syndrome X-linked 309050 Lutheran suppressor X-linked 300010 A-11 gene 300074 X chromosome-controlling ele…	GLUD2|0.005528299|85.19%	1CG-001|3CG-035|3CG-042|3CG-047|3CG-064|3CG-173|8CG-004
DGC	GNL3L	7	100	X	p22.33|p11.1	301780 Arylsulfatase C f form 300345 Microphthalmia isolated with coloboma 1 300471 Cubitus valgus with mental retardation and unusual facies 300484 Orofaciodigital syndrome VIII 300716 Mental retardation X-linked 95 300719 Deafness cataract retinitis pigmentosa and sperm abnormalities 300864 Cerebral-cerebellar-coloboma syndrome X-linked 309050 Lutheran suppressor X-linked 301067 Family with seq…	GNL3L|0.049650322|62.77%	1CG-001|3CG-035|3CG-042|3CG-047|3CG-064|3CG-173|8CG-004
DGC	GPC3	7	100	X	q11.1|q28	300345 Microphthalmia isolated with coloboma 1 300471 Cubitus valgus with mental retardation and unusual facies 300484 Orofaciodigital syndrome VIII 300716 Mental retardation X-linked 95 300719 Deafness cataract retinitis pigmentosa and sperm abnormalities 300864 Cerebral-cerebellar-coloboma syndrome X-linked 309050 Lutheran suppressor X-linked 300010 A-11 gene 300074 X chromosome-controlling ele…	GPC3|0.988007244|1.17%	1CG-001|3CG-035|3CG-042|3CG-047|3CG-064|3CG-173|8CG-004
DGC	GPC3-AS1	7	100	X	q11.1|q28	300345 Microphthalmia isolated with coloboma 1 300471 Cubitus valgus with mental retardation and unusual facies 300484 Orofaciodigital syndrome VIII 300716 Mental retardation X-linked 95 300719 Deafness cataract retinitis pigmentosa and sperm abnormalities 300864 Cerebral-cerebellar-coloboma syndrome X-linked 309050 Lutheran suppressor X-linked 300010 A-11 gene 300074 X chromosome-controlling ele…	NA	1CG-001|3CG-035|3CG-042|3CG-047|3CG-064|3CG-173|8CG-004
DGC	GPC4	7	100	X	q11.1|q28	300345 Microphthalmia isolated with coloboma 1 300471 Cubitus valgus with mental retardation and unusual facies 300484 Orofaciodigital syndrome VIII 300716 Mental retardation X-linked 95 300719 Deafness cataract retinitis pigmentosa and sperm abnormalities 300864 Cerebral-cerebellar-coloboma syndrome X-linked 309050 Lutheran suppressor X-linked 300010 A-11 gene 300074 X chromosome-controlling ele…	GPC4|0.466713815|17.33%	1CG-001|3CG-035|3CG-042|3CG-047|3CG-064|3CG-173|8CG-004
DGC	GPKOW	7	100	X	p22.33|p11.1	301780 Arylsulfatase C f form 300345 Microphthalmia isolated with coloboma 1 300471 Cubitus valgus with mental retardation and unusual facies 300484 Orofaciodigital syndrome VIII 300716 Mental retardation X-linked 95 300719 Deafness cataract retinitis pigmentosa and sperm abnormalities 300864 Cerebral-cerebellar-coloboma syndrome X-linked 309050 Lutheran suppressor X-linked 301067 Family with seq…	GPKOW|0.032912204|68.2%	1CG-001|3CG-035|3CG-042|3CG-047|3CG-064|3CG-173|8CG-004
DGC	GPM6B	7	100	X	p22.33|p11.1	301780 Arylsulfatase C f form 300345 Microphthalmia isolated with coloboma 1 300471 Cubitus valgus with mental retardation and unusual facies 300484 Orofaciodigital syndrome VIII 300716 Mental retardation X-linked 95 300719 Deafness cataract retinitis pigmentosa and sperm abnormalities 300864 Cerebral-cerebellar-coloboma syndrome X-linked 309050 Lutheran suppressor X-linked 301067 Family with seq…	GPM6B|0.369275334|22.76%	1CG-001|3CG-035|3CG-042|3CG-047|3CG-064|3CG-173|8CG-004
DGC	GPR101	7	100	X	q11.1|q28	300345 Microphthalmia isolated with coloboma 1 300471 Cubitus valgus with mental retardation and unusual facies 300484 Orofaciodigital syndrome VIII 300716 Mental retardation X-linked 95 300719 Deafness cataract retinitis pigmentosa and sperm abnormalities 300864 Cerebral-cerebellar-coloboma syndrome X-linked 309050 Lutheran suppressor X-linked 300010 A-11 gene 300074 X chromosome-controlling ele…	GPR101|0.033229357|68.06%	1CG-001|3CG-035|3CG-042|3CG-047|3CG-064|3CG-173|8CG-004
DGC	GPR119	7	100	X	q11.1|q28	300345 Microphthalmia isolated with coloboma 1 300471 Cubitus valgus with mental retardation and unusual facies 300484 Orofaciodigital syndrome VIII 300716 Mental retardation X-linked 95 300719 Deafness cataract retinitis pigmentosa and sperm abnormalities 300864 Cerebral-cerebellar-coloboma syndrome X-linked 309050 Lutheran suppressor X-linked 300010 A-11 gene 300074 X chromosome-controlling ele…	GPR119|0.112417194|48.78%	1CG-001|3CG-035|3CG-042|3CG-047|3CG-064|3CG-173|8CG-004
DGC	GPR143	7	100	X	p22.33|p11.1	301780 Arylsulfatase C f form 300345 Microphthalmia isolated with coloboma 1 300471 Cubitus valgus with mental retardation and unusual facies 300484 Orofaciodigital syndrome VIII 300716 Mental retardation X-linked 95 300719 Deafness cataract retinitis pigmentosa and sperm abnormalities 300864 Cerebral-cerebellar-coloboma syndrome X-linked 309050 Lutheran suppressor X-linked 301067 Family with seq…	GPR143|0.037189856|66.71%	1CG-001|3CG-035|3CG-042|3CG-047|3CG-064|3CG-173|8CG-004
DGC	GPR173	7	100	X	p22.33|p11.1	301780 Arylsulfatase C f form 300345 Microphthalmia isolated with coloboma 1 300471 Cubitus valgus with mental retardation and unusual facies 300484 Orofaciodigital syndrome VIII 300716 Mental retardation X-linked 95 300719 Deafness cataract retinitis pigmentosa and sperm abnormalities 300864 Cerebral-cerebellar-coloboma syndrome X-linked 309050 Lutheran suppressor X-linked 301067 Family with seq…	GPR173|0.169490988|40.37%	1CG-001|3CG-035|3CG-042|3CG-047|3CG-064|3CG-173|8CG-004
DGC	GPR174	7	100	X	q11.1|q28	300345 Microphthalmia isolated with coloboma 1 300471 Cubitus valgus with mental retardation and unusual facies 300484 Orofaciodigital syndrome VIII 300716 Mental retardation X-linked 95 300719 Deafness cataract retinitis pigmentosa and sperm abnormalities 300864 Cerebral-cerebellar-coloboma syndrome X-linked 309050 Lutheran suppressor X-linked 300010 A-11 gene 300074 X chromosome-controlling ele…	GPR174|0.121069978|47.27%	1CG-001|3CG-035|3CG-042|3CG-047|3CG-064|3CG-173|8CG-004
DGC	GPR34	7	100	X	p22.33|p11.1	301780 Arylsulfatase C f form 300345 Microphthalmia isolated with coloboma 1 300471 Cubitus valgus with mental retardation and unusual facies 300484 Orofaciodigital syndrome VIII 300716 Mental retardation X-linked 95 300719 Deafness cataract retinitis pigmentosa and sperm abnormalities 300864 Cerebral-cerebellar-coloboma syndrome X-linked 309050 Lutheran suppressor X-linked 301067 Family with seq…	GPR34|0.128344345|46.14%	1CG-001|3CG-035|3CG-042|3CG-047|3CG-064|3CG-173|8CG-004
DGC	GPR50	7	100	X	q11.1|q28	300345 Microphthalmia isolated with coloboma 1 300471 Cubitus valgus with mental retardation and unusual facies 300484 Orofaciodigital syndrome VIII 300716 Mental retardation X-linked 95 300719 Deafness cataract retinitis pigmentosa and sperm abnormalities 300864 Cerebral-cerebellar-coloboma syndrome X-linked 309050 Lutheran suppressor X-linked 300010 A-11 gene 300074 X chromosome-controlling ele…	GPR50|0.00878576|81.88%	1CG-001|3CG-035|3CG-042|3CG-047|3CG-064|3CG-173|8CG-004
DGC	GPR50-AS1	7	100	X	q11.1|q28	300345 Microphthalmia isolated with coloboma 1 300471 Cubitus valgus with mental retardation and unusual facies 300484 Orofaciodigital syndrome VIII 300716 Mental retardation X-linked 95 300719 Deafness cataract retinitis pigmentosa and sperm abnormalities 300864 Cerebral-cerebellar-coloboma syndrome X-linked 309050 Lutheran suppressor X-linked 300010 A-11 gene 300074 X chromosome-controlling ele…	NA	1CG-001|3CG-035|3CG-042|3CG-047|3CG-064|3CG-173|8CG-004
DGC	GPR82	7	100	X	p22.33|p11.1	301780 Arylsulfatase C f form 300345 Microphthalmia isolated with coloboma 1 300471 Cubitus valgus with mental retardation and unusual facies 300484 Orofaciodigital syndrome VIII 300716 Mental retardation X-linked 95 300719 Deafness cataract retinitis pigmentosa and sperm abnormalities 300864 Cerebral-cerebellar-coloboma syndrome X-linked 309050 Lutheran suppressor X-linked 301067 Family with seq…	GPR82|0.0788962|55.45%	1CG-001|3CG-035|3CG-042|3CG-047|3CG-064|3CG-173|8CG-004
DGC	GPRASP1	7	100	X	q11.1|q28	300345 Microphthalmia isolated with coloboma 1 300471 Cubitus valgus with mental retardation and unusual facies 300484 Orofaciodigital syndrome VIII 300716 Mental retardation X-linked 95 300719 Deafness cataract retinitis pigmentosa and sperm abnormalities 300864 Cerebral-cerebellar-coloboma syndrome X-linked 309050 Lutheran suppressor X-linked 300010 A-11 gene 300074 X chromosome-controlling ele…	GPRASP1|0.003101612|88.5%	1CG-001|3CG-035|3CG-042|3CG-047|3CG-064|3CG-173|8CG-004
DGC	GPRASP2	7	100	X	q11.1|q28	300345 Microphthalmia isolated with coloboma 1 300471 Cubitus valgus with mental retardation and unusual facies 300484 Orofaciodigital syndrome VIII 300716 Mental retardation X-linked 95 300719 Deafness cataract retinitis pigmentosa and sperm abnormalities 300864 Cerebral-cerebellar-coloboma syndrome X-linked 309050 Lutheran suppressor X-linked 300010 A-11 gene 300074 X chromosome-controlling ele…	GPRASP2|0.026807669|71%	1CG-001|3CG-035|3CG-042|3CG-047|3CG-064|3CG-173|8CG-004
DGC	GRIA3	7	100	X	q11.1|q28	300345 Microphthalmia isolated with coloboma 1 300471 Cubitus valgus with mental retardation and unusual facies 300484 Orofaciodigital syndrome VIII 300716 Mental retardation X-linked 95 300719 Deafness cataract retinitis pigmentosa and sperm abnormalities 300864 Cerebral-cerebellar-coloboma syndrome X-linked 309050 Lutheran suppressor X-linked 300010 A-11 gene 300074 X chromosome-controlling ele…	GRIA3|0.935818586|2.64%	1CG-001|3CG-035|3CG-042|3CG-047|3CG-064|3CG-173|8CG-004
DGC	GRIPAP1	7	100	X	p22.33|p11.1	301780 Arylsulfatase C f form 300345 Microphthalmia isolated with coloboma 1 300471 Cubitus valgus with mental retardation and unusual facies 300484 Orofaciodigital syndrome VIII 300716 Mental retardation X-linked 95 300719 Deafness cataract retinitis pigmentosa and sperm abnormalities 300864 Cerebral-cerebellar-coloboma syndrome X-linked 309050 Lutheran suppressor X-linked 301067 Family with seq…	GRIPAP1|0.120003086|47.43%	1CG-001|3CG-035|3CG-042|3CG-047|3CG-064|3CG-173|8CG-004
DGC	GRPR	7	100	X	p22.33|p11.1	301780 Arylsulfatase C f form 300345 Microphthalmia isolated with coloboma 1 300471 Cubitus valgus with mental retardation and unusual facies 300484 Orofaciodigital syndrome VIII 300716 Mental retardation X-linked 95 300719 Deafness cataract retinitis pigmentosa and sperm abnormalities 300864 Cerebral-cerebellar-coloboma syndrome X-linked 309050 Lutheran suppressor X-linked 301067 Family with seq…	GRPR|0.391292698|21.32%	1CG-001|3CG-035|3CG-042|3CG-047|3CG-064|3CG-173|8CG-004
DGC	GS1-594A7.3	7	100	X	p22.33|p11.1	301780 Arylsulfatase C f form 300345 Microphthalmia isolated with coloboma 1 300471 Cubitus valgus with mental retardation and unusual facies 300484 Orofaciodigital syndrome VIII 300716 Mental retardation X-linked 95 300719 Deafness cataract retinitis pigmentosa and sperm abnormalities 300864 Cerebral-cerebellar-coloboma syndrome X-linked 309050 Lutheran suppressor X-linked 301067 Family with seq…	NA	1CG-001|3CG-035|3CG-042|3CG-047|3CG-064|3CG-173|8CG-004
DGC	GS1-600G8.3	7	100	X	p22.33|p11.1	301780 Arylsulfatase C f form 300345 Microphthalmia isolated with coloboma 1 300471 Cubitus valgus with mental retardation and unusual facies 300484 Orofaciodigital syndrome VIII 300716 Mental retardation X-linked 95 300719 Deafness cataract retinitis pigmentosa and sperm abnormalities 300864 Cerebral-cerebellar-coloboma syndrome X-linked 309050 Lutheran suppressor X-linked 301067 Family with seq…	NA	1CG-001|3CG-035|3CG-042|3CG-047|3CG-064|3CG-173|8CG-004
DGC	GSPT2	7	100	X	p22.33|p11.1	301780 Arylsulfatase C f form 300345 Microphthalmia isolated with coloboma 1 300471 Cubitus valgus with mental retardation and unusual facies 300484 Orofaciodigital syndrome VIII 300716 Mental retardation X-linked 95 300719 Deafness cataract retinitis pigmentosa and sperm abnormalities 300864 Cerebral-cerebellar-coloboma syndrome X-linked 309050 Lutheran suppressor X-linked 301067 Family with seq…	GSPT2|0.15476278|42.33%	1CG-001|3CG-035|3CG-042|3CG-047|3CG-064|3CG-173|8CG-004
DGC	GUCY2F	7	100	X	q11.1|q28	300345 Microphthalmia isolated with coloboma 1 300471 Cubitus valgus with mental retardation and unusual facies 300484 Orofaciodigital syndrome VIII 300716 Mental retardation X-linked 95 300719 Deafness cataract retinitis pigmentosa and sperm abnormalities 300864 Cerebral-cerebellar-coloboma syndrome X-linked 309050 Lutheran suppressor X-linked 300010 A-11 gene 300074 X chromosome-controlling ele…	GUCY2F|0.157201193|42.01%	1CG-001|3CG-035|3CG-042|3CG-047|3CG-064|3CG-173|8CG-004
DGC	GYG2	7	100	X	p22.33|p11.1	301780 Arylsulfatase C f form 300345 Microphthalmia isolated with coloboma 1 300471 Cubitus valgus with mental retardation and unusual facies 300484 Orofaciodigital syndrome VIII 300716 Mental retardation X-linked 95 300719 Deafness cataract retinitis pigmentosa and sperm abnormalities 300864 Cerebral-cerebellar-coloboma syndrome X-linked 309050 Lutheran suppressor X-linked 301067 Family with seq…	GYG2|0.001763876|91.62%	1CG-001|3CG-035|3CG-042|3CG-047|3CG-064|3CG-173|8CG-004
DGC	H2AB1	7	100	X	q11.1|q28	300345 Microphthalmia isolated with coloboma 1 300471 Cubitus valgus with mental retardation and unusual facies 300484 Orofaciodigital syndrome VIII 300716 Mental retardation X-linked 95 300719 Deafness cataract retinitis pigmentosa and sperm abnormalities 300864 Cerebral-cerebellar-coloboma syndrome X-linked 309050 Lutheran suppressor X-linked 300010 A-11 gene 300074 X chromosome-controlling ele…	NA	1CG-001|3CG-035|3CG-042|3CG-047|3CG-064|3CG-173|8CG-004
DGC	H2AB2	7	100	X	q11.1|q28	300345 Microphthalmia isolated with coloboma 1 300471 Cubitus valgus with mental retardation and unusual facies 300484 Orofaciodigital syndrome VIII 300716 Mental retardation X-linked 95 300719 Deafness cataract retinitis pigmentosa and sperm abnormalities 300864 Cerebral-cerebellar-coloboma syndrome X-linked 309050 Lutheran suppressor X-linked 300010 A-11 gene 300074 X chromosome-controlling ele…	NA	1CG-001|3CG-035|3CG-042|3CG-047|3CG-064|3CG-173|8CG-004
DGC	H2AB3	7	100	X	q11.1|q28	300345 Microphthalmia isolated with coloboma 1 300471 Cubitus valgus with mental retardation and unusual facies 300484 Orofaciodigital syndrome VIII 300716 Mental retardation X-linked 95 300719 Deafness cataract retinitis pigmentosa and sperm abnormalities 300864 Cerebral-cerebellar-coloboma syndrome X-linked 309050 Lutheran suppressor X-linked 300010 A-11 gene 300074 X chromosome-controlling ele…	NA	1CG-001|3CG-035|3CG-042|3CG-047|3CG-064|3CG-173|8CG-004
DGC	H2AP	7	100	X	p22.33|p11.1	301780 Arylsulfatase C f form 300345 Microphthalmia isolated with coloboma 1 300471 Cubitus valgus with mental retardation and unusual facies 300484 Orofaciodigital syndrome VIII 300716 Mental retardation X-linked 95 300719 Deafness cataract retinitis pigmentosa and sperm abnormalities 300864 Cerebral-cerebellar-coloboma syndrome X-linked 309050 Lutheran suppressor X-linked 301067 Family with seq…	NA	1CG-001|3CG-035|3CG-042|3CG-047|3CG-064|3CG-173|8CG-004
DGC	H2BW1	7	100	X	q11.1|q28	300345 Microphthalmia isolated with coloboma 1 300471 Cubitus valgus with mental retardation and unusual facies 300484 Orofaciodigital syndrome VIII 300716 Mental retardation X-linked 95 300719 Deafness cataract retinitis pigmentosa and sperm abnormalities 300864 Cerebral-cerebellar-coloboma syndrome X-linked 309050 Lutheran suppressor X-linked 300010 A-11 gene 300074 X chromosome-controlling ele…	NA	1CG-001|3CG-035|3CG-042|3CG-047|3CG-064|3CG-173|8CG-004
DGC	H2BW2	7	100	X	q11.1|q28	300345 Microphthalmia isolated with coloboma 1 300471 Cubitus valgus with mental retardation and unusual facies 300484 Orofaciodigital syndrome VIII 300716 Mental retardation X-linked 95 300719 Deafness cataract retinitis pigmentosa and sperm abnormalities 300864 Cerebral-cerebellar-coloboma syndrome X-linked 309050 Lutheran suppressor X-linked 300010 A-11 gene 300074 X chromosome-controlling ele…	NA	1CG-001|3CG-035|3CG-042|3CG-047|3CG-064|3CG-173|8CG-004
DGC	H2BW3P	7	100	X	q11.1|q28	300345 Microphthalmia isolated with coloboma 1 300471 Cubitus valgus with mental retardation and unusual facies 300484 Orofaciodigital syndrome VIII 300716 Mental retardation X-linked 95 300719 Deafness cataract retinitis pigmentosa and sperm abnormalities 300864 Cerebral-cerebellar-coloboma syndrome X-linked 309050 Lutheran suppressor X-linked 300010 A-11 gene 300074 X chromosome-controlling ele…	NA	1CG-001|3CG-035|3CG-042|3CG-047|3CG-064|3CG-173|8CG-004
DGC	H2BW4P	7	100	X	q11.1|q28	300345 Microphthalmia isolated with coloboma 1 300471 Cubitus valgus with mental retardation and unusual facies 300484 Orofaciodigital syndrome VIII 300716 Mental retardation X-linked 95 300719 Deafness cataract retinitis pigmentosa and sperm abnormalities 300864 Cerebral-cerebellar-coloboma syndrome X-linked 309050 Lutheran suppressor X-linked 300010 A-11 gene 300074 X chromosome-controlling ele…	NA	1CG-001|3CG-035|3CG-042|3CG-047|3CG-064|3CG-173|8CG-004
DGC	HAUS7	7	100	X	q11.1|q28	300345 Microphthalmia isolated with coloboma 1 300471 Cubitus valgus with mental retardation and unusual facies 300484 Orofaciodigital syndrome VIII 300716 Mental retardation X-linked 95 300719 Deafness cataract retinitis pigmentosa and sperm abnormalities 300864 Cerebral-cerebellar-coloboma syndrome X-linked 309050 Lutheran suppressor X-linked 300010 A-11 gene 300074 X chromosome-controlling ele…	HAUS7|0.002975563|88.68%	1CG-001|3CG-035|3CG-042|3CG-047|3CG-064|3CG-173|8CG-004
DGC	HCCS	7	100	X	p22.33|p11.1	301780 Arylsulfatase C f form 300345 Microphthalmia isolated with coloboma 1 300471 Cubitus valgus with mental retardation and unusual facies 300484 Orofaciodigital syndrome VIII 300716 Mental retardation X-linked 95 300719 Deafness cataract retinitis pigmentosa and sperm abnormalities 300864 Cerebral-cerebellar-coloboma syndrome X-linked 309050 Lutheran suppressor X-linked 301067 Family with seq…	HCCS|0.165024239|40.92%	1CG-001|3CG-035|3CG-042|3CG-047|3CG-064|3CG-173|8CG-004
DGC	HCFC1	7	100	X	q11.1|q28	300345 Microphthalmia isolated with coloboma 1 300471 Cubitus valgus with mental retardation and unusual facies 300484 Orofaciodigital syndrome VIII 300716 Mental retardation X-linked 95 300719 Deafness cataract retinitis pigmentosa and sperm abnormalities 300864 Cerebral-cerebellar-coloboma syndrome X-linked 309050 Lutheran suppressor X-linked 300010 A-11 gene 300074 X chromosome-controlling ele…	HCFC1|0.161458383|41.35%	1CG-001|3CG-035|3CG-042|3CG-047|3CG-064|3CG-173|8CG-004
DGC	HCFC1-AS1	7	100	X	q11.1|q28	300345 Microphthalmia isolated with coloboma 1 300471 Cubitus valgus with mental retardation and unusual facies 300484 Orofaciodigital syndrome VIII 300716 Mental retardation X-linked 95 300719 Deafness cataract retinitis pigmentosa and sperm abnormalities 300864 Cerebral-cerebellar-coloboma syndrome X-linked 309050 Lutheran suppressor X-linked 300010 A-11 gene 300074 X chromosome-controlling ele…	NA	1CG-001|3CG-035|3CG-042|3CG-047|3CG-064|3CG-173|8CG-004
DGC	HDAC6	7	100	X	p22.33|p11.1	301780 Arylsulfatase C f form 300345 Microphthalmia isolated with coloboma 1 300471 Cubitus valgus with mental retardation and unusual facies 300484 Orofaciodigital syndrome VIII 300716 Mental retardation X-linked 95 300719 Deafness cataract retinitis pigmentosa and sperm abnormalities 300864 Cerebral-cerebellar-coloboma syndrome X-linked 309050 Lutheran suppressor X-linked 301067 Family with seq…	HDAC6|0.116515765|48.04%	1CG-001|3CG-035|3CG-042|3CG-047|3CG-064|3CG-173|8CG-004
DGC	HDAC8	7	100	X	q11.1|q28	300345 Microphthalmia isolated with coloboma 1 300471 Cubitus valgus with mental retardation and unusual facies 300484 Orofaciodigital syndrome VIII 300716 Mental retardation X-linked 95 300719 Deafness cataract retinitis pigmentosa and sperm abnormalities 300864 Cerebral-cerebellar-coloboma syndrome X-linked 309050 Lutheran suppressor X-linked 300010 A-11 gene 300074 X chromosome-controlling ele…	HDAC8|0.520282578|15.01%	1CG-001|3CG-035|3CG-042|3CG-047|3CG-064|3CG-173|8CG-004
DGC	HDX	7	100	X	q11.1|q28	300345 Microphthalmia isolated with coloboma 1 300471 Cubitus valgus with mental retardation and unusual facies 300484 Orofaciodigital syndrome VIII 300716 Mental retardation X-linked 95 300719 Deafness cataract retinitis pigmentosa and sperm abnormalities 300864 Cerebral-cerebellar-coloboma syndrome X-linked 309050 Lutheran suppressor X-linked 300010 A-11 gene 300074 X chromosome-controlling ele…	HDX|0.278129485|29.25%	1CG-001|3CG-035|3CG-042|3CG-047|3CG-064|3CG-173|8CG-004
DGC	HEPH	7	100	X	q11.1|q28	300345 Microphthalmia isolated with coloboma 1 300471 Cubitus valgus with mental retardation and unusual facies 300484 Orofaciodigital syndrome VIII 300716 Mental retardation X-linked 95 300719 Deafness cataract retinitis pigmentosa and sperm abnormalities 300864 Cerebral-cerebellar-coloboma syndrome X-linked 309050 Lutheran suppressor X-linked 300010 A-11 gene 300074 X chromosome-controlling ele…	HEPH|0.080329009|55.09%	1CG-001|3CG-035|3CG-042|3CG-047|3CG-064|3CG-173|8CG-004
DGC	HMGB3	7	100	X	q11.1|q28	300345 Microphthalmia isolated with coloboma 1 300471 Cubitus valgus with mental retardation and unusual facies 300484 Orofaciodigital syndrome VIII 300716 Mental retardation X-linked 95 300719 Deafness cataract retinitis pigmentosa and sperm abnormalities 300864 Cerebral-cerebellar-coloboma syndrome X-linked 309050 Lutheran suppressor X-linked 300010 A-11 gene 300074 X chromosome-controlling ele…	HMGB3|0.202241588|36.49%	1CG-001|3CG-035|3CG-042|3CG-047|3CG-064|3CG-173|8CG-004
DGC	HMGN5	7	100	X	q11.1|q28	300345 Microphthalmia isolated with coloboma 1 300471 Cubitus valgus with mental retardation and unusual facies 300484 Orofaciodigital syndrome VIII 300716 Mental retardation X-linked 95 300719 Deafness cataract retinitis pigmentosa and sperm abnormalities 300864 Cerebral-cerebellar-coloboma syndrome X-linked 309050 Lutheran suppressor X-linked 300010 A-11 gene 300074 X chromosome-controlling ele…	HMGN5|0.008497819|82.15%	1CG-001|3CG-035|3CG-042|3CG-047|3CG-064|3CG-173|8CG-004
DGC	HNRNPH2	7	100	X	q11.1|q28	300345 Microphthalmia isolated with coloboma 1 300471 Cubitus valgus with mental retardation and unusual facies 300484 Orofaciodigital syndrome VIII 300716 Mental retardation X-linked 95 300719 Deafness cataract retinitis pigmentosa and sperm abnormalities 300864 Cerebral-cerebellar-coloboma syndrome X-linked 309050 Lutheran suppressor X-linked 300010 A-11 gene 300074 X chromosome-controlling ele…	HNRNPH2|0.416648807|19.77%	1CG-001|3CG-035|3CG-042|3CG-047|3CG-064|3CG-173|8CG-004
DGC	HPRT1	7	100	X	q11.1|q28	300345 Microphthalmia isolated with coloboma 1 300471 Cubitus valgus with mental retardation and unusual facies 300484 Orofaciodigital syndrome VIII 300716 Mental retardation X-linked 95 300719 Deafness cataract retinitis pigmentosa and sperm abnormalities 300864 Cerebral-cerebellar-coloboma syndrome X-linked 309050 Lutheran suppressor X-linked 300010 A-11 gene 300074 X chromosome-controlling ele…	HPRT1|0.70057344|8.48%	1CG-001|3CG-035|3CG-042|3CG-047|3CG-064|3CG-173|8CG-004
DGC	HS6ST2	7	100	X	q11.1|q28	300345 Microphthalmia isolated with coloboma 1 300471 Cubitus valgus with mental retardation and unusual facies 300484 Orofaciodigital syndrome VIII 300716 Mental retardation X-linked 95 300719 Deafness cataract retinitis pigmentosa and sperm abnormalities 300864 Cerebral-cerebellar-coloboma syndrome X-linked 309050 Lutheran suppressor X-linked 300010 A-11 gene 300074 X chromosome-controlling ele…	HS6ST2|0.553393979|13.58%	1CG-001|3CG-035|3CG-042|3CG-047|3CG-064|3CG-173|8CG-004
DGC	HS6ST2-AS1	7	100	X	q11.1|q28	300345 Microphthalmia isolated with coloboma 1 300471 Cubitus valgus with mental retardation and unusual facies 300484 Orofaciodigital syndrome VIII 300716 Mental retardation X-linked 95 300719 Deafness cataract retinitis pigmentosa and sperm abnormalities 300864 Cerebral-cerebellar-coloboma syndrome X-linked 309050 Lutheran suppressor X-linked 300010 A-11 gene 300074 X chromosome-controlling ele…	NA	1CG-001|3CG-035|3CG-042|3CG-047|3CG-064|3CG-173|8CG-004
DGC	HSD17B10	7	100	X	p22.33|p11.1	301780 Arylsulfatase C f form 300345 Microphthalmia isolated with coloboma 1 300471 Cubitus valgus with mental retardation and unusual facies 300484 Orofaciodigital syndrome VIII 300716 Mental retardation X-linked 95 300719 Deafness cataract retinitis pigmentosa and sperm abnormalities 300864 Cerebral-cerebellar-coloboma syndrome X-linked 309050 Lutheran suppressor X-linked 301067 Family with seq…	HSD17B10|0.386681199|21.63%	1CG-001|3CG-035|3CG-042|3CG-047|3CG-064|3CG-173|8CG-004
DGC	HSFX1	7	100	X	q11.1|q28	300345 Microphthalmia isolated with coloboma 1 300471 Cubitus valgus with mental retardation and unusual facies 300484 Orofaciodigital syndrome VIII 300716 Mental retardation X-linked 95 300719 Deafness cataract retinitis pigmentosa and sperm abnormalities 300864 Cerebral-cerebellar-coloboma syndrome X-linked 309050 Lutheran suppressor X-linked 300010 A-11 gene 300074 X chromosome-controlling ele…	HSFX1|0.000336056|99.26%	1CG-001|3CG-035|3CG-042|3CG-047|3CG-064|3CG-173|8CG-004
DGC	HSFX2	7	100	X	q11.1|q28	300345 Microphthalmia isolated with coloboma 1 300471 Cubitus valgus with mental retardation and unusual facies 300484 Orofaciodigital syndrome VIII 300716 Mental retardation X-linked 95 300719 Deafness cataract retinitis pigmentosa and sperm abnormalities 300864 Cerebral-cerebellar-coloboma syndrome X-linked 309050 Lutheran suppressor X-linked 300010 A-11 gene 300074 X chromosome-controlling ele…	HSFX2|0.000230502|99.69%	1CG-001|3CG-035|3CG-042|3CG-047|3CG-064|3CG-173|8CG-004
DGC	HSFX3	7	100	X	q11.1|q28	300345 Microphthalmia isolated with coloboma 1 300471 Cubitus valgus with mental retardation and unusual facies 300484 Orofaciodigital syndrome VIII 300716 Mental retardation X-linked 95 300719 Deafness cataract retinitis pigmentosa and sperm abnormalities 300864 Cerebral-cerebellar-coloboma syndrome X-linked 309050 Lutheran suppressor X-linked 300010 A-11 gene 300074 X chromosome-controlling ele…	NA	1CG-001|3CG-035|3CG-042|3CG-047|3CG-064|3CG-173|8CG-004
DGC	HSFX4	7	100	X	q11.1|q28	300345 Microphthalmia isolated with coloboma 1 300471 Cubitus valgus with mental retardation and unusual facies 300484 Orofaciodigital syndrome VIII 300716 Mental retardation X-linked 95 300719 Deafness cataract retinitis pigmentosa and sperm abnormalities 300864 Cerebral-cerebellar-coloboma syndrome X-linked 309050 Lutheran suppressor X-linked 300010 A-11 gene 300074 X chromosome-controlling ele…	NA	1CG-001|3CG-035|3CG-042|3CG-047|3CG-064|3CG-173|8CG-004
DGC	HTATSF1	7	100	X	q11.1|q28	300345 Microphthalmia isolated with coloboma 1 300471 Cubitus valgus with mental retardation and unusual facies 300484 Orofaciodigital syndrome VIII 300716 Mental retardation X-linked 95 300719 Deafness cataract retinitis pigmentosa and sperm abnormalities 300864 Cerebral-cerebellar-coloboma syndrome X-linked 309050 Lutheran suppressor X-linked 300010 A-11 gene 300074 X chromosome-controlling ele…	HTATSF1|0.079215432|55.35%	1CG-001|3CG-035|3CG-042|3CG-047|3CG-064|3CG-173|8CG-004
DGC	HTR2C	7	100	X	q11.1|q28	300345 Microphthalmia isolated with coloboma 1 300471 Cubitus valgus with mental retardation and unusual facies 300484 Orofaciodigital syndrome VIII 300716 Mental retardation X-linked 95 300719 Deafness cataract retinitis pigmentosa and sperm abnormalities 300864 Cerebral-cerebellar-coloboma syndrome X-linked 309050 Lutheran suppressor X-linked 300010 A-11 gene 300074 X chromosome-controlling ele…	HTR2C|0.212748462|35.27%	1CG-001|3CG-035|3CG-042|3CG-047|3CG-064|3CG-173|8CG-004
DGC	HUWE1	7	100	X	p22.33|p11.1	301780 Arylsulfatase C f form 300345 Microphthalmia isolated with coloboma 1 300471 Cubitus valgus with mental retardation and unusual facies 300484 Orofaciodigital syndrome VIII 300716 Mental retardation X-linked 95 300719 Deafness cataract retinitis pigmentosa and sperm abnormalities 300864 Cerebral-cerebellar-coloboma syndrome X-linked 309050 Lutheran suppressor X-linked 301067 Family with seq…	HUWE1|0.636259624|10.58%	1CG-001|3CG-035|3CG-042|3CG-047|3CG-064|3CG-173|8CG-004
DGC	IDH3G	7	100	X	q11.1|q28	300345 Microphthalmia isolated with coloboma 1 300471 Cubitus valgus with mental retardation and unusual facies 300484 Orofaciodigital syndrome VIII 300716 Mental retardation X-linked 95 300719 Deafness cataract retinitis pigmentosa and sperm abnormalities 300864 Cerebral-cerebellar-coloboma syndrome X-linked 309050 Lutheran suppressor X-linked 300010 A-11 gene 300074 X chromosome-controlling ele…	IDH3G|0.233394637|33.06%	1CG-001|3CG-035|3CG-042|3CG-047|3CG-064|3CG-173|8CG-004
DGC	IDS	7	100	X	q11.1|q28	300345 Microphthalmia isolated with coloboma 1 300471 Cubitus valgus with mental retardation and unusual facies 300484 Orofaciodigital syndrome VIII 300716 Mental retardation X-linked 95 300719 Deafness cataract retinitis pigmentosa and sperm abnormalities 300864 Cerebral-cerebellar-coloboma syndrome X-linked 309050 Lutheran suppressor X-linked 300010 A-11 gene 300074 X chromosome-controlling ele…	IDS|0.544287721|14.02%	1CG-001|3CG-035|3CG-042|3CG-047|3CG-064|3CG-173|8CG-004
DGC	IGBP1	7	100	X	q11.1|q28	300345 Microphthalmia isolated with coloboma 1 300471 Cubitus valgus with mental retardation and unusual facies 300484 Orofaciodigital syndrome VIII 300716 Mental retardation X-linked 95 300719 Deafness cataract retinitis pigmentosa and sperm abnormalities 300864 Cerebral-cerebellar-coloboma syndrome X-linked 309050 Lutheran suppressor X-linked 300010 A-11 gene 300074 X chromosome-controlling ele…	IGBP1|0.173867284|39.79%	1CG-001|3CG-035|3CG-042|3CG-047|3CG-064|3CG-173|8CG-004
DGC	IGSF1	7	100	X	q11.1|q28	300345 Microphthalmia isolated with coloboma 1 300471 Cubitus valgus with mental retardation and unusual facies 300484 Orofaciodigital syndrome VIII 300716 Mental retardation X-linked 95 300719 Deafness cataract retinitis pigmentosa and sperm abnormalities 300864 Cerebral-cerebellar-coloboma syndrome X-linked 309050 Lutheran suppressor X-linked 300010 A-11 gene 300074 X chromosome-controlling ele…	IGSF1|0.217194784|34.71%	1CG-001|3CG-035|3CG-042|3CG-047|3CG-064|3CG-173|8CG-004
DGC	IKBKG	7	100	X	q11.1|q28	300345 Microphthalmia isolated with coloboma 1 300471 Cubitus valgus with mental retardation and unusual facies 300484 Orofaciodigital syndrome VIII 300716 Mental retardation X-linked 95 300719 Deafness cataract retinitis pigmentosa and sperm abnormalities 300864 Cerebral-cerebellar-coloboma syndrome X-linked 309050 Lutheran suppressor X-linked 300010 A-11 gene 300074 X chromosome-controlling ele…	IKBKG|0.159689771|41.6%	1CG-001|3CG-035|3CG-042|3CG-047|3CG-064|3CG-173|8CG-004
DGC	IL13RA1	7	100	X	q11.1|q28	300345 Microphthalmia isolated with coloboma 1 300471 Cubitus valgus with mental retardation and unusual facies 300484 Orofaciodigital syndrome VIII 300716 Mental retardation X-linked 95 300719 Deafness cataract retinitis pigmentosa and sperm abnormalities 300864 Cerebral-cerebellar-coloboma syndrome X-linked 309050 Lutheran suppressor X-linked 300010 A-11 gene 300074 X chromosome-controlling ele…	IL13RA1|0.044428128|64.36%	1CG-001|3CG-035|3CG-042|3CG-047|3CG-064|3CG-173|8CG-004
DGC	IL13RA2	7	100	X	q11.1|q28	300345 Microphthalmia isolated with coloboma 1 300471 Cubitus valgus with mental retardation and unusual facies 300484 Orofaciodigital syndrome VIII 300716 Mental retardation X-linked 95 300719 Deafness cataract retinitis pigmentosa and sperm abnormalities 300864 Cerebral-cerebellar-coloboma syndrome X-linked 309050 Lutheran suppressor X-linked 300010 A-11 gene 300074 X chromosome-controlling ele…	IL13RA2|0.016773362|76.03%	1CG-001|3CG-035|3CG-042|3CG-047|3CG-064|3CG-173|8CG-004
DGC	IL1RAPL1	7	100	X	p22.33|p11.1	301780 Arylsulfatase C f form 300345 Microphthalmia isolated with coloboma 1 300471 Cubitus valgus with mental retardation and unusual facies 300484 Orofaciodigital syndrome VIII 300716 Mental retardation X-linked 95 300719 Deafness cataract retinitis pigmentosa and sperm abnormalities 300864 Cerebral-cerebellar-coloboma syndrome X-linked 309050 Lutheran suppressor X-linked 301067 Family with seq…	IL1RAPL1|0.968329118|1.75%	1CG-001|3CG-035|3CG-042|3CG-047|3CG-064|3CG-173|8CG-004
DGC	IL1RAPL2	7	100	X	q11.1|q28	300345 Microphthalmia isolated with coloboma 1 300471 Cubitus valgus with mental retardation and unusual facies 300484 Orofaciodigital syndrome VIII 300716 Mental retardation X-linked 95 300719 Deafness cataract retinitis pigmentosa and sperm abnormalities 300864 Cerebral-cerebellar-coloboma syndrome X-linked 309050 Lutheran suppressor X-linked 300010 A-11 gene 300074 X chromosome-controlling ele…	IL1RAPL2|0.874064576|4.12%	1CG-001|3CG-035|3CG-042|3CG-047|3CG-064|3CG-173|8CG-004
DGC	IL2RG	7	100	X	q11.1|q28	300345 Microphthalmia isolated with coloboma 1 300471 Cubitus valgus with mental retardation and unusual facies 300484 Orofaciodigital syndrome VIII 300716 Mental retardation X-linked 95 300719 Deafness cataract retinitis pigmentosa and sperm abnormalities 300864 Cerebral-cerebellar-coloboma syndrome X-linked 309050 Lutheran suppressor X-linked 300010 A-11 gene 300074 X chromosome-controlling ele…	IL2RG|0.056339711|60.83%	1CG-001|3CG-035|3CG-042|3CG-047|3CG-064|3CG-173|8CG-004
DGC	INE1	7	100	X	p22.33|p11.1	301780 Arylsulfatase C f form 300345 Microphthalmia isolated with coloboma 1 300471 Cubitus valgus with mental retardation and unusual facies 300484 Orofaciodigital syndrome VIII 300716 Mental retardation X-linked 95 300719 Deafness cataract retinitis pigmentosa and sperm abnormalities 300864 Cerebral-cerebellar-coloboma syndrome X-linked 309050 Lutheran suppressor X-linked 301067 Family with seq…	NA	1CG-001|3CG-035|3CG-042|3CG-047|3CG-064|3CG-173|8CG-004
DGC	INE2	7	100	X	p22.33|p11.1	301780 Arylsulfatase C f form 300345 Microphthalmia isolated with coloboma 1 300471 Cubitus valgus with mental retardation and unusual facies 300484 Orofaciodigital syndrome VIII 300716 Mental retardation X-linked 95 300719 Deafness cataract retinitis pigmentosa and sperm abnormalities 300864 Cerebral-cerebellar-coloboma syndrome X-linked 309050 Lutheran suppressor X-linked 301067 Family with seq…	NA	1CG-001|3CG-035|3CG-042|3CG-047|3CG-064|3CG-173|8CG-004
DGC	INGX	7	100	X	q11.1|q28	300345 Microphthalmia isolated with coloboma 1 300471 Cubitus valgus with mental retardation and unusual facies 300484 Orofaciodigital syndrome VIII 300716 Mental retardation X-linked 95 300719 Deafness cataract retinitis pigmentosa and sperm abnormalities 300864 Cerebral-cerebellar-coloboma syndrome X-linked 309050 Lutheran suppressor X-linked 300010 A-11 gene 300074 X chromosome-controlling ele…	NA	1CG-001|3CG-035|3CG-042|3CG-047|3CG-064|3CG-173|8CG-004
DGC	INTS6L	7	100	X	q11.1|q28	300345 Microphthalmia isolated with coloboma 1 300471 Cubitus valgus with mental retardation and unusual facies 300484 Orofaciodigital syndrome VIII 300716 Mental retardation X-linked 95 300719 Deafness cataract retinitis pigmentosa and sperm abnormalities 300864 Cerebral-cerebellar-coloboma syndrome X-linked 309050 Lutheran suppressor X-linked 300010 A-11 gene 300074 X chromosome-controlling ele…	NA	1CG-001|3CG-035|3CG-042|3CG-047|3CG-064|3CG-173|8CG-004
DGC	INTS6L-AS1	7	100	X	q11.1|q28	300345 Microphthalmia isolated with coloboma 1 300471 Cubitus valgus with mental retardation and unusual facies 300484 Orofaciodigital syndrome VIII 300716 Mental retardation X-linked 95 300719 Deafness cataract retinitis pigmentosa and sperm abnormalities 300864 Cerebral-cerebellar-coloboma syndrome X-linked 309050 Lutheran suppressor X-linked 300010 A-11 gene 300074 X chromosome-controlling ele…	NA	1CG-001|3CG-035|3CG-042|3CG-047|3CG-064|3CG-173|8CG-004
DGC	IQSEC2	7	100	X	p22.33|p11.1	301780 Arylsulfatase C f form 300345 Microphthalmia isolated with coloboma 1 300471 Cubitus valgus with mental retardation and unusual facies 300484 Orofaciodigital syndrome VIII 300716 Mental retardation X-linked 95 300719 Deafness cataract retinitis pigmentosa and sperm abnormalities 300864 Cerebral-cerebellar-coloboma syndrome X-linked 309050 Lutheran suppressor X-linked 301067 Family with seq…	IQSEC2|0.319746311|26.16%	1CG-001|3CG-035|3CG-042|3CG-047|3CG-064|3CG-173|8CG-004
DGC	IRAK1	7	100	X	q11.1|q28	300345 Microphthalmia isolated with coloboma 1 300471 Cubitus valgus with mental retardation and unusual facies 300484 Orofaciodigital syndrome VIII 300716 Mental retardation X-linked 95 300719 Deafness cataract retinitis pigmentosa and sperm abnormalities 300864 Cerebral-cerebellar-coloboma syndrome X-linked 309050 Lutheran suppressor X-linked 300010 A-11 gene 300074 X chromosome-controlling ele…	IRAK1|0.112675597|48.73%	1CG-001|3CG-035|3CG-042|3CG-047|3CG-064|3CG-173|8CG-004
DGC	IRS4	7	100	X	q11.1|q28	300345 Microphthalmia isolated with coloboma 1 300471 Cubitus valgus with mental retardation and unusual facies 300484 Orofaciodigital syndrome VIII 300716 Mental retardation X-linked 95 300719 Deafness cataract retinitis pigmentosa and sperm abnormalities 300864 Cerebral-cerebellar-coloboma syndrome X-linked 309050 Lutheran suppressor X-linked 300010 A-11 gene 300074 X chromosome-controlling ele…	IRS4|0.092969045|52.62%	1CG-001|3CG-035|3CG-042|3CG-047|3CG-064|3CG-173|8CG-004
DGC	ITGB1BP2	7	100	X	q11.1|q28	300345 Microphthalmia isolated with coloboma 1 300471 Cubitus valgus with mental retardation and unusual facies 300484 Orofaciodigital syndrome VIII 300716 Mental retardation X-linked 95 300719 Deafness cataract retinitis pigmentosa and sperm abnormalities 300864 Cerebral-cerebellar-coloboma syndrome X-linked 309050 Lutheran suppressor X-linked 300010 A-11 gene 300074 X chromosome-controlling ele…	ITGB1BP2|0.264651068|30.32%	1CG-001|3CG-035|3CG-042|3CG-047|3CG-064|3CG-173|8CG-004
DGC	ITIH6	7	100	X	p22.33|p11.1	301780 Arylsulfatase C f form 300345 Microphthalmia isolated with coloboma 1 300471 Cubitus valgus with mental retardation and unusual facies 300484 Orofaciodigital syndrome VIII 300716 Mental retardation X-linked 95 300719 Deafness cataract retinitis pigmentosa and sperm abnormalities 300864 Cerebral-cerebellar-coloboma syndrome X-linked 309050 Lutheran suppressor X-linked 301067 Family with seq…	ITIH6|0.007125376|83.38%	1CG-001|3CG-035|3CG-042|3CG-047|3CG-064|3CG-173|8CG-004
DGC	ITM2A	7	100	X	q11.1|q28	300345 Microphthalmia isolated with coloboma 1 300471 Cubitus valgus with mental retardation and unusual facies 300484 Orofaciodigital syndrome VIII 300716 Mental retardation X-linked 95 300719 Deafness cataract retinitis pigmentosa and sperm abnormalities 300864 Cerebral-cerebellar-coloboma syndrome X-linked 309050 Lutheran suppressor X-linked 300010 A-11 gene 300074 X chromosome-controlling ele…	ITM2A|0.049228814|62.9%	1CG-001|3CG-035|3CG-042|3CG-047|3CG-064|3CG-173|8CG-004
DGC	JADE3	7	100	X	p22.33|p11.1	301780 Arylsulfatase C f form 300345 Microphthalmia isolated with coloboma 1 300471 Cubitus valgus with mental retardation and unusual facies 300484 Orofaciodigital syndrome VIII 300716 Mental retardation X-linked 95 300719 Deafness cataract retinitis pigmentosa and sperm abnormalities 300864 Cerebral-cerebellar-coloboma syndrome X-linked 309050 Lutheran suppressor X-linked 301067 Family with seq…	JADE3|0.171220253|40.15%	1CG-001|3CG-035|3CG-042|3CG-047|3CG-064|3CG-173|8CG-004
DGC	JPX	7	100	X	q11.1|q28	300345 Microphthalmia isolated with coloboma 1 300471 Cubitus valgus with mental retardation and unusual facies 300484 Orofaciodigital syndrome VIII 300716 Mental retardation X-linked 95 300719 Deafness cataract retinitis pigmentosa and sperm abnormalities 300864 Cerebral-cerebellar-coloboma syndrome X-linked 309050 Lutheran suppressor X-linked 300010 A-11 gene 300074 X chromosome-controlling ele…	NA	1CG-001|3CG-035|3CG-042|3CG-047|3CG-064|3CG-173|8CG-004
DGC	KANTR	7	100	X	p22.33|p11.1	301780 Arylsulfatase C f form 300345 Microphthalmia isolated with coloboma 1 300471 Cubitus valgus with mental retardation and unusual facies 300484 Orofaciodigital syndrome VIII 300716 Mental retardation X-linked 95 300719 Deafness cataract retinitis pigmentosa and sperm abnormalities 300864 Cerebral-cerebellar-coloboma syndrome X-linked 309050 Lutheran suppressor X-linked 301067 Family with seq…	NA	1CG-001|3CG-035|3CG-042|3CG-047|3CG-064|3CG-173|8CG-004
DGC	KCND1	7	100	X	p22.33|p11.1	301780 Arylsulfatase C f form 300345 Microphthalmia isolated with coloboma 1 300471 Cubitus valgus with mental retardation and unusual facies 300484 Orofaciodigital syndrome VIII 300716 Mental retardation X-linked 95 300719 Deafness cataract retinitis pigmentosa and sperm abnormalities 300864 Cerebral-cerebellar-coloboma syndrome X-linked 309050 Lutheran suppressor X-linked 301067 Family with seq…	KCND1|0.204160466|36.22%	1CG-001|3CG-035|3CG-042|3CG-047|3CG-064|3CG-173|8CG-004
DGC	KCNE5	7	100	X	q11.1|q28	300345 Microphthalmia isolated with coloboma 1 300471 Cubitus valgus with mental retardation and unusual facies 300484 Orofaciodigital syndrome VIII 300716 Mental retardation X-linked 95 300719 Deafness cataract retinitis pigmentosa and sperm abnormalities 300864 Cerebral-cerebellar-coloboma syndrome X-linked 309050 Lutheran suppressor X-linked 300010 A-11 gene 300074 X chromosome-controlling ele…	KCNE5|0.041771536|65.19%	1CG-001|3CG-035|3CG-042|3CG-047|3CG-064|3CG-173|8CG-004
DGC	KDM5C	7	100	X	p22.33|p11.1	301780 Arylsulfatase C f form 300345 Microphthalmia isolated with coloboma 1 300471 Cubitus valgus with mental retardation and unusual facies 300484 Orofaciodigital syndrome VIII 300716 Mental retardation X-linked 95 300719 Deafness cataract retinitis pigmentosa and sperm abnormalities 300864 Cerebral-cerebellar-coloboma syndrome X-linked 309050 Lutheran suppressor X-linked 301067 Family with seq…	KDM5C|0.60217231|11.71%	1CG-001|3CG-035|3CG-042|3CG-047|3CG-064|3CG-173|8CG-004
DGC	KDM6A	7	100	X	p22.33|p11.1	301780 Arylsulfatase C f form 300345 Microphthalmia isolated with coloboma 1 300471 Cubitus valgus with mental retardation and unusual facies 300484 Orofaciodigital syndrome VIII 300716 Mental retardation X-linked 95 300719 Deafness cataract retinitis pigmentosa and sperm abnormalities 300864 Cerebral-cerebellar-coloboma syndrome X-linked 309050 Lutheran suppressor X-linked 301067 Family with seq…	KDM6A|0.845633626|4.72%	1CG-001|3CG-035|3CG-042|3CG-047|3CG-064|3CG-173|8CG-004
DGC	KIAA1210	7	100	X	q11.1|q28	300345 Microphthalmia isolated with coloboma 1 300471 Cubitus valgus with mental retardation and unusual facies 300484 Orofaciodigital syndrome VIII 300716 Mental retardation X-linked 95 300719 Deafness cataract retinitis pigmentosa and sperm abnormalities 300864 Cerebral-cerebellar-coloboma syndrome X-linked 309050 Lutheran suppressor X-linked 300010 A-11 gene 300074 X chromosome-controlling ele…	KIAA1210|0.000369314|99.15%	1CG-001|3CG-035|3CG-042|3CG-047|3CG-064|3CG-173|8CG-004
DGC	KIF4A	7	100	X	q11.1|q28	300345 Microphthalmia isolated with coloboma 1 300471 Cubitus valgus with mental retardation and unusual facies 300484 Orofaciodigital syndrome VIII 300716 Mental retardation X-linked 95 300719 Deafness cataract retinitis pigmentosa and sperm abnormalities 300864 Cerebral-cerebellar-coloboma syndrome X-linked 309050 Lutheran suppressor X-linked 300010 A-11 gene 300074 X chromosome-controlling ele…	KIF4A|0.433464236|19.01%	1CG-001|3CG-035|3CG-042|3CG-047|3CG-064|3CG-173|8CG-004
DGC	KLF8	7	100	X	p22.33|p11.1	301780 Arylsulfatase C f form 300345 Microphthalmia isolated with coloboma 1 300471 Cubitus valgus with mental retardation and unusual facies 300484 Orofaciodigital syndrome VIII 300716 Mental retardation X-linked 95 300719 Deafness cataract retinitis pigmentosa and sperm abnormalities 300864 Cerebral-cerebellar-coloboma syndrome X-linked 309050 Lutheran suppressor X-linked 301067 Family with seq…	KLF8|0.05760719|60.52%	1CG-001|3CG-035|3CG-042|3CG-047|3CG-064|3CG-173|8CG-004
DGC	KLHL13	7	100	X	q11.1|q28	300345 Microphthalmia isolated with coloboma 1 300471 Cubitus valgus with mental retardation and unusual facies 300484 Orofaciodigital syndrome VIII 300716 Mental retardation X-linked 95 300719 Deafness cataract retinitis pigmentosa and sperm abnormalities 300864 Cerebral-cerebellar-coloboma syndrome X-linked 309050 Lutheran suppressor X-linked 300010 A-11 gene 300074 X chromosome-controlling ele…	KLHL13|0.368516646|22.8%	1CG-001|3CG-035|3CG-042|3CG-047|3CG-064|3CG-173|8CG-004
DGC	KLHL15	7	100	X	p22.33|p11.1	301780 Arylsulfatase C f form 300345 Microphthalmia isolated with coloboma 1 300471 Cubitus valgus with mental retardation and unusual facies 300484 Orofaciodigital syndrome VIII 300716 Mental retardation X-linked 95 300719 Deafness cataract retinitis pigmentosa and sperm abnormalities 300864 Cerebral-cerebellar-coloboma syndrome X-linked 309050 Lutheran suppressor X-linked 301067 Family with seq…	KLHL15|0.473382213|17.04%	1CG-001|3CG-035|3CG-042|3CG-047|3CG-064|3CG-173|8CG-004
DGC	KLHL34	7	100	X	p22.33|p11.1	301780 Arylsulfatase C f form 300345 Microphthalmia isolated with coloboma 1 300471 Cubitus valgus with mental retardation and unusual facies 300484 Orofaciodigital syndrome VIII 300716 Mental retardation X-linked 95 300719 Deafness cataract retinitis pigmentosa and sperm abnormalities 300864 Cerebral-cerebellar-coloboma syndrome X-linked 309050 Lutheran suppressor X-linked 301067 Family with seq…	KLHL34|0.061653417|59.41%	1CG-001|3CG-035|3CG-042|3CG-047|3CG-064|3CG-173|8CG-004
DGC	KLHL4	7	100	X	q11.1|q28	300345 Microphthalmia isolated with coloboma 1 300471 Cubitus valgus with mental retardation and unusual facies 300484 Orofaciodigital syndrome VIII 300716 Mental retardation X-linked 95 300719 Deafness cataract retinitis pigmentosa and sperm abnormalities 300864 Cerebral-cerebellar-coloboma syndrome X-linked 309050 Lutheran suppressor X-linked 300010 A-11 gene 300074 X chromosome-controlling ele…	KLHL4|0.081693966|54.83%	1CG-001|3CG-035|3CG-042|3CG-047|3CG-064|3CG-173|8CG-004
DGC	KRBOX4	7	100	X	p22.33|p11.1	301780 Arylsulfatase C f form 300345 Microphthalmia isolated with coloboma 1 300471 Cubitus valgus with mental retardation and unusual facies 300484 Orofaciodigital syndrome VIII 300716 Mental retardation X-linked 95 300719 Deafness cataract retinitis pigmentosa and sperm abnormalities 300864 Cerebral-cerebellar-coloboma syndrome X-linked 309050 Lutheran suppressor X-linked 301067 Family with seq…	KRBOX4|0.004805684|86.09%	1CG-001|3CG-035|3CG-042|3CG-047|3CG-064|3CG-173|8CG-004
DGC	L1CAM	7	100	X	q11.1|q28	300345 Microphthalmia isolated with coloboma 1 300471 Cubitus valgus with mental retardation and unusual facies 300484 Orofaciodigital syndrome VIII 300716 Mental retardation X-linked 95 300719 Deafness cataract retinitis pigmentosa and sperm abnormalities 300864 Cerebral-cerebellar-coloboma syndrome X-linked 309050 Lutheran suppressor X-linked 300010 A-11 gene 300074 X chromosome-controlling ele…	L1CAM|0.504864866|15.59%	1CG-001|3CG-035|3CG-042|3CG-047|3CG-064|3CG-173|8CG-004
DGC	LAGE3	7	100	X	q11.1|q28	300345 Microphthalmia isolated with coloboma 1 300471 Cubitus valgus with mental retardation and unusual facies 300484 Orofaciodigital syndrome VIII 300716 Mental retardation X-linked 95 300719 Deafness cataract retinitis pigmentosa and sperm abnormalities 300864 Cerebral-cerebellar-coloboma syndrome X-linked 309050 Lutheran suppressor X-linked 300010 A-11 gene 300074 X chromosome-controlling ele…	LAGE3|0.00020457|99.75%	1CG-001|3CG-035|3CG-042|3CG-047|3CG-064|3CG-173|8CG-004
DGC	LAMP2	7	100	X	q11.1|q28	300345 Microphthalmia isolated with coloboma 1 300471 Cubitus valgus with mental retardation and unusual facies 300484 Orofaciodigital syndrome VIII 300716 Mental retardation X-linked 95 300719 Deafness cataract retinitis pigmentosa and sperm abnormalities 300864 Cerebral-cerebellar-coloboma syndrome X-linked 309050 Lutheran suppressor X-linked 300010 A-11 gene 300074 X chromosome-controlling ele…	LAMP2|0.08295171|54.6%	1CG-001|3CG-035|3CG-042|3CG-047|3CG-064|3CG-173|8CG-004
DGC	LANCL3	7	100	X	p22.33|p11.1	301780 Arylsulfatase C f form 300345 Microphthalmia isolated with coloboma 1 300471 Cubitus valgus with mental retardation and unusual facies 300484 Orofaciodigital syndrome VIII 300716 Mental retardation X-linked 95 300719 Deafness cataract retinitis pigmentosa and sperm abnormalities 300864 Cerebral-cerebellar-coloboma syndrome X-linked 309050 Lutheran suppressor X-linked 301067 Family with seq…	LANCL3|0.154118929|42.39%	1CG-001|3CG-035|3CG-042|3CG-047|3CG-064|3CG-173|8CG-004
DGC	LAS1L	7	100	X	q11.1|q28	300345 Microphthalmia isolated with coloboma 1 300471 Cubitus valgus with mental retardation and unusual facies 300484 Orofaciodigital syndrome VIII 300716 Mental retardation X-linked 95 300719 Deafness cataract retinitis pigmentosa and sperm abnormalities 300864 Cerebral-cerebellar-coloboma syndrome X-linked 309050 Lutheran suppressor X-linked 300010 A-11 gene 300074 X chromosome-controlling ele…	LAS1L|0.049218753|62.91%	1CG-001|3CG-035|3CG-042|3CG-047|3CG-064|3CG-173|8CG-004
DGC	LCA10	7	100	X	q11.1|q28	300345 Microphthalmia isolated with coloboma 1 300471 Cubitus valgus with mental retardation and unusual facies 300484 Orofaciodigital syndrome VIII 300716 Mental retardation X-linked 95 300719 Deafness cataract retinitis pigmentosa and sperm abnormalities 300864 Cerebral-cerebellar-coloboma syndrome X-linked 309050 Lutheran suppressor X-linked 300010 A-11 gene 300074 X chromosome-controlling ele…	NA	1CG-001|3CG-035|3CG-042|3CG-047|3CG-064|3CG-173|8CG-004
DGC	LDOC1	7	100	X	q11.1|q28	300345 Microphthalmia isolated with coloboma 1 300471 Cubitus valgus with mental retardation and unusual facies 300484 Orofaciodigital syndrome VIII 300716 Mental retardation X-linked 95 300719 Deafness cataract retinitis pigmentosa and sperm abnormalities 300864 Cerebral-cerebellar-coloboma syndrome X-linked 309050 Lutheran suppressor X-linked 300010 A-11 gene 300074 X chromosome-controlling ele…	LDOC1|0.038067266|66.43%	1CG-001|3CG-035|3CG-042|3CG-047|3CG-064|3CG-173|8CG-004
DGC	LHFPL1	7	100	X	q11.1|q28	300345 Microphthalmia isolated with coloboma 1 300471 Cubitus valgus with mental retardation and unusual facies 300484 Orofaciodigital syndrome VIII 300716 Mental retardation X-linked 95 300719 Deafness cataract retinitis pigmentosa and sperm abnormalities 300864 Cerebral-cerebellar-coloboma syndrome X-linked 309050 Lutheran suppressor X-linked 300010 A-11 gene 300074 X chromosome-controlling ele…	LHFPL1|0.340921365|24.8%	1CG-001|3CG-035|3CG-042|3CG-047|3CG-064|3CG-173|8CG-004
DGC	LINC00269	7	100	X	q11.1|q28	300345 Microphthalmia isolated with coloboma 1 300471 Cubitus valgus with mental retardation and unusual facies 300484 Orofaciodigital syndrome VIII 300716 Mental retardation X-linked 95 300719 Deafness cataract retinitis pigmentosa and sperm abnormalities 300864 Cerebral-cerebellar-coloboma syndrome X-linked 309050 Lutheran suppressor X-linked 300010 A-11 gene 300074 X chromosome-controlling ele…	NA	1CG-001|3CG-035|3CG-042|3CG-047|3CG-064|3CG-173|8CG-004
DGC	LINC00629	7	100	X	q11.1|q28	300345 Microphthalmia isolated with coloboma 1 300471 Cubitus valgus with mental retardation and unusual facies 300484 Orofaciodigital syndrome VIII 300716 Mental retardation X-linked 95 300719 Deafness cataract retinitis pigmentosa and sperm abnormalities 300864 Cerebral-cerebellar-coloboma syndrome X-linked 309050 Lutheran suppressor X-linked 300010 A-11 gene 300074 X chromosome-controlling ele…	NA	1CG-001|3CG-035|3CG-042|3CG-047|3CG-064|3CG-173|8CG-004
DGC	LINC00630	7	100	X	q11.1|q28	300345 Microphthalmia isolated with coloboma 1 300471 Cubitus valgus with mental retardation and unusual facies 300484 Orofaciodigital syndrome VIII 300716 Mental retardation X-linked 95 300719 Deafness cataract retinitis pigmentosa and sperm abnormalities 300864 Cerebral-cerebellar-coloboma syndrome X-linked 309050 Lutheran suppressor X-linked 300010 A-11 gene 300074 X chromosome-controlling ele…	NA	1CG-001|3CG-035|3CG-042|3CG-047|3CG-064|3CG-173|8CG-004
DGC	LINC00632	7	100	X	q11.1|q28	300345 Microphthalmia isolated with coloboma 1 300471 Cubitus valgus with mental retardation and unusual facies 300484 Orofaciodigital syndrome VIII 300716 Mental retardation X-linked 95 300719 Deafness cataract retinitis pigmentosa and sperm abnormalities 300864 Cerebral-cerebellar-coloboma syndrome X-linked 309050 Lutheran suppressor X-linked 300010 A-11 gene 300074 X chromosome-controlling ele…	LINC00632|0.005786706|84.84%	1CG-001|3CG-035|3CG-042|3CG-047|3CG-064|3CG-173|8CG-004
DGC	LINC00850	7	100	X	q11.1|q28	300345 Microphthalmia isolated with coloboma 1 300471 Cubitus valgus with mental retardation and unusual facies 300484 Orofaciodigital syndrome VIII 300716 Mental retardation X-linked 95 300719 Deafness cataract retinitis pigmentosa and sperm abnormalities 300864 Cerebral-cerebellar-coloboma syndrome X-linked 309050 Lutheran suppressor X-linked 300010 A-11 gene 300074 X chromosome-controlling ele…	NA	1CG-001|3CG-035|3CG-042|3CG-047|3CG-064|3CG-173|8CG-004
DGC	LINC00891	7	100	X	q11.1|q28	300345 Microphthalmia isolated with coloboma 1 300471 Cubitus valgus with mental retardation and unusual facies 300484 Orofaciodigital syndrome VIII 300716 Mental retardation X-linked 95 300719 Deafness cataract retinitis pigmentosa and sperm abnormalities 300864 Cerebral-cerebellar-coloboma syndrome X-linked 309050 Lutheran suppressor X-linked 300010 A-11 gene 300074 X chromosome-controlling ele…	NA	1CG-001|3CG-035|3CG-042|3CG-047|3CG-064|3CG-173|8CG-004
DGC	LINC00892	7	100	X	q11.1|q28	300345 Microphthalmia isolated with coloboma 1 300471 Cubitus valgus with mental retardation and unusual facies 300484 Orofaciodigital syndrome VIII 300716 Mental retardation X-linked 95 300719 Deafness cataract retinitis pigmentosa and sperm abnormalities 300864 Cerebral-cerebellar-coloboma syndrome X-linked 309050 Lutheran suppressor X-linked 300010 A-11 gene 300074 X chromosome-controlling ele…	NA	1CG-001|3CG-035|3CG-042|3CG-047|3CG-064|3CG-173|8CG-004
DGC	LINC00893	7	100	X	q11.1|q28	300345 Microphthalmia isolated with coloboma 1 300471 Cubitus valgus with mental retardation and unusual facies 300484 Orofaciodigital syndrome VIII 300716 Mental retardation X-linked 95 300719 Deafness cataract retinitis pigmentosa and sperm abnormalities 300864 Cerebral-cerebellar-coloboma syndrome X-linked 309050 Lutheran suppressor X-linked 300010 A-11 gene 300074 X chromosome-controlling ele…	NA	1CG-001|3CG-035|3CG-042|3CG-047|3CG-064|3CG-173|8CG-004
DGC	LINC00894	7	100	X	q11.1|q28	300345 Microphthalmia isolated with coloboma 1 300471 Cubitus valgus with mental retardation and unusual facies 300484 Orofaciodigital syndrome VIII 300716 Mental retardation X-linked 95 300719 Deafness cataract retinitis pigmentosa and sperm abnormalities 300864 Cerebral-cerebellar-coloboma syndrome X-linked 309050 Lutheran suppressor X-linked 300010 A-11 gene 300074 X chromosome-controlling ele…	NA	1CG-001|3CG-035|3CG-042|3CG-047|3CG-064|3CG-173|8CG-004
DGC	LINC01186	7	100	X	p22.33|p11.1	301780 Arylsulfatase C f form 300345 Microphthalmia isolated with coloboma 1 300471 Cubitus valgus with mental retardation and unusual facies 300484 Orofaciodigital syndrome VIII 300716 Mental retardation X-linked 95 300719 Deafness cataract retinitis pigmentosa and sperm abnormalities 300864 Cerebral-cerebellar-coloboma syndrome X-linked 309050 Lutheran suppressor X-linked 301067 Family with seq…	NA	1CG-001|3CG-035|3CG-042|3CG-047|3CG-064|3CG-173|8CG-004
DGC	LINC01201	7	100	X	q11.1|q28	300345 Microphthalmia isolated with coloboma 1 300471 Cubitus valgus with mental retardation and unusual facies 300484 Orofaciodigital syndrome VIII 300716 Mental retardation X-linked 95 300719 Deafness cataract retinitis pigmentosa and sperm abnormalities 300864 Cerebral-cerebellar-coloboma syndrome X-linked 309050 Lutheran suppressor X-linked 300010 A-11 gene 300074 X chromosome-controlling ele…	NA	1CG-001|3CG-035|3CG-042|3CG-047|3CG-064|3CG-173|8CG-004
DGC	LINC01203	7	100	X	p22.33|p11.1	301780 Arylsulfatase C f form 300345 Microphthalmia isolated with coloboma 1 300471 Cubitus valgus with mental retardation and unusual facies 300484 Orofaciodigital syndrome VIII 300716 Mental retardation X-linked 95 300719 Deafness cataract retinitis pigmentosa and sperm abnormalities 300864 Cerebral-cerebellar-coloboma syndrome X-linked 309050 Lutheran suppressor X-linked 301067 Family with seq…	NA	1CG-001|3CG-035|3CG-042|3CG-047|3CG-064|3CG-173|8CG-004
DGC	LINC01204	7	100	X	p22.33|p11.1	301780 Arylsulfatase C f form 300345 Microphthalmia isolated with coloboma 1 300471 Cubitus valgus with mental retardation and unusual facies 300484 Orofaciodigital syndrome VIII 300716 Mental retardation X-linked 95 300719 Deafness cataract retinitis pigmentosa and sperm abnormalities 300864 Cerebral-cerebellar-coloboma syndrome X-linked 309050 Lutheran suppressor X-linked 301067 Family with seq…	NA	1CG-001|3CG-035|3CG-042|3CG-047|3CG-064|3CG-173|8CG-004
DGC	LINC01278	7	100	X	q11.1|q28	300345 Microphthalmia isolated with coloboma 1 300471 Cubitus valgus with mental retardation and unusual facies 300484 Orofaciodigital syndrome VIII 300716 Mental retardation X-linked 95 300719 Deafness cataract retinitis pigmentosa and sperm abnormalities 300864 Cerebral-cerebellar-coloboma syndrome X-linked 309050 Lutheran suppressor X-linked 300010 A-11 gene 300074 X chromosome-controlling ele…	NA	1CG-001|3CG-035|3CG-042|3CG-047|3CG-064|3CG-173|8CG-004
DGC	LINC01281	7	100	X	p22.33|p11.1	301780 Arylsulfatase C f form 300345 Microphthalmia isolated with coloboma 1 300471 Cubitus valgus with mental retardation and unusual facies 300484 Orofaciodigital syndrome VIII 300716 Mental retardation X-linked 95 300719 Deafness cataract retinitis pigmentosa and sperm abnormalities 300864 Cerebral-cerebellar-coloboma syndrome X-linked 309050 Lutheran suppressor X-linked 301067 Family with seq…	NA	1CG-001|3CG-035|3CG-042|3CG-047|3CG-064|3CG-173|8CG-004
DGC	LINC01282	7	100	X	p22.33|p11.1	301780 Arylsulfatase C f form 300345 Microphthalmia isolated with coloboma 1 300471 Cubitus valgus with mental retardation and unusual facies 300484 Orofaciodigital syndrome VIII 300716 Mental retardation X-linked 95 300719 Deafness cataract retinitis pigmentosa and sperm abnormalities 300864 Cerebral-cerebellar-coloboma syndrome X-linked 309050 Lutheran suppressor X-linked 301067 Family with seq…	NA	1CG-001|3CG-035|3CG-042|3CG-047|3CG-064|3CG-173|8CG-004
DGC	LINC01284	7	100	X	p22.33|p11.1	301780 Arylsulfatase C f form 300345 Microphthalmia isolated with coloboma 1 300471 Cubitus valgus with mental retardation and unusual facies 300484 Orofaciodigital syndrome VIII 300716 Mental retardation X-linked 95 300719 Deafness cataract retinitis pigmentosa and sperm abnormalities 300864 Cerebral-cerebellar-coloboma syndrome X-linked 309050 Lutheran suppressor X-linked 301067 Family with seq…	NA	1CG-001|3CG-035|3CG-042|3CG-047|3CG-064|3CG-173|8CG-004
DGC	LINC01285	7	100	X	q11.1|q28	300345 Microphthalmia isolated with coloboma 1 300471 Cubitus valgus with mental retardation and unusual facies 300484 Orofaciodigital syndrome VIII 300716 Mental retardation X-linked 95 300719 Deafness cataract retinitis pigmentosa and sperm abnormalities 300864 Cerebral-cerebellar-coloboma syndrome X-linked 309050 Lutheran suppressor X-linked 300010 A-11 gene 300074 X chromosome-controlling ele…	NA	1CG-001|3CG-035|3CG-042|3CG-047|3CG-064|3CG-173|8CG-004
DGC	LINC01402	7	100	X	q11.1|q28	300345 Microphthalmia isolated with coloboma 1 300471 Cubitus valgus with mental retardation and unusual facies 300484 Orofaciodigital syndrome VIII 300716 Mental retardation X-linked 95 300719 Deafness cataract retinitis pigmentosa and sperm abnormalities 300864 Cerebral-cerebellar-coloboma syndrome X-linked 309050 Lutheran suppressor X-linked 300010 A-11 gene 300074 X chromosome-controlling ele…	NA	1CG-001|3CG-035|3CG-042|3CG-047|3CG-064|3CG-173|8CG-004
DGC	LINC01456	7	100	X	p22.33|p11.1	301780 Arylsulfatase C f form 300345 Microphthalmia isolated with coloboma 1 300471 Cubitus valgus with mental retardation and unusual facies 300484 Orofaciodigital syndrome VIII 300716 Mental retardation X-linked 95 300719 Deafness cataract retinitis pigmentosa and sperm abnormalities 300864 Cerebral-cerebellar-coloboma syndrome X-linked 309050 Lutheran suppressor X-linked 301067 Family with seq…	NA	1CG-001|3CG-035|3CG-042|3CG-047|3CG-064|3CG-173|8CG-004
DGC	LINC01496	7	100	X	p22.33|p11.1	301780 Arylsulfatase C f form 300345 Microphthalmia isolated with coloboma 1 300471 Cubitus valgus with mental retardation and unusual facies 300484 Orofaciodigital syndrome VIII 300716 Mental retardation X-linked 95 300719 Deafness cataract retinitis pigmentosa and sperm abnormalities 300864 Cerebral-cerebellar-coloboma syndrome X-linked 309050 Lutheran suppressor X-linked 301067 Family with seq…	NA	1CG-001|3CG-035|3CG-042|3CG-047|3CG-064|3CG-173|8CG-004
DGC	LINC01545	7	100	X	p22.33|p11.1	301780 Arylsulfatase C f form 300345 Microphthalmia isolated with coloboma 1 300471 Cubitus valgus with mental retardation and unusual facies 300484 Orofaciodigital syndrome VIII 300716 Mental retardation X-linked 95 300719 Deafness cataract retinitis pigmentosa and sperm abnormalities 300864 Cerebral-cerebellar-coloboma syndrome X-linked 309050 Lutheran suppressor X-linked 301067 Family with seq…	LINC01545|0.002083908|90.77%	1CG-001|3CG-035|3CG-042|3CG-047|3CG-064|3CG-173|8CG-004
DGC	LINC01546	7	100	X	p22.33|p11.1	301780 Arylsulfatase C f form 300345 Microphthalmia isolated with coloboma 1 300471 Cubitus valgus with mental retardation and unusual facies 300484 Orofaciodigital syndrome VIII 300716 Mental retardation X-linked 95 300719 Deafness cataract retinitis pigmentosa and sperm abnormalities 300864 Cerebral-cerebellar-coloboma syndrome X-linked 309050 Lutheran suppressor X-linked 301067 Family with seq…	LINC01546|0.000622231|97.77%	1CG-001|3CG-035|3CG-042|3CG-047|3CG-064|3CG-173|8CG-004
DGC	LINC01560	7	100	X	p22.33|p11.1	301780 Arylsulfatase C f form 300345 Microphthalmia isolated with coloboma 1 300471 Cubitus valgus with mental retardation and unusual facies 300484 Orofaciodigital syndrome VIII 300716 Mental retardation X-linked 95 300719 Deafness cataract retinitis pigmentosa and sperm abnormalities 300864 Cerebral-cerebellar-coloboma syndrome X-linked 309050 Lutheran suppressor X-linked 301067 Family with seq…	LINC01560|0.001037144|95.23%	1CG-001|3CG-035|3CG-042|3CG-047|3CG-064|3CG-173|8CG-004
DGC	LINC02154	7	100	X	p22.33|p11.1	301780 Arylsulfatase C f form 300345 Microphthalmia isolated with coloboma 1 300471 Cubitus valgus with mental retardation and unusual facies 300484 Orofaciodigital syndrome VIII 300716 Mental retardation X-linked 95 300719 Deafness cataract retinitis pigmentosa and sperm abnormalities 300864 Cerebral-cerebellar-coloboma syndrome X-linked 309050 Lutheran suppressor X-linked 301067 Family with seq…	NA	1CG-001|3CG-035|3CG-042|3CG-047|3CG-064|3CG-173|8CG-004
DGC	LINC02243	7	100	X	q11.1|q28	300345 Microphthalmia isolated with coloboma 1 300471 Cubitus valgus with mental retardation and unusual facies 300484 Orofaciodigital syndrome VIII 300716 Mental retardation X-linked 95 300719 Deafness cataract retinitis pigmentosa and sperm abnormalities 300864 Cerebral-cerebellar-coloboma syndrome X-linked 309050 Lutheran suppressor X-linked 300010 A-11 gene 300074 X chromosome-controlling ele…	NA	1CG-001|3CG-035|3CG-042|3CG-047|3CG-064|3CG-173|8CG-004
DGC	LINC02589	7	100	X	q11.1|q28	300345 Microphthalmia isolated with coloboma 1 300471 Cubitus valgus with mental retardation and unusual facies 300484 Orofaciodigital syndrome VIII 300716 Mental retardation X-linked 95 300719 Deafness cataract retinitis pigmentosa and sperm abnormalities 300864 Cerebral-cerebellar-coloboma syndrome X-linked 309050 Lutheran suppressor X-linked 300010 A-11 gene 300074 X chromosome-controlling ele…	NA	1CG-001|3CG-035|3CG-042|3CG-047|3CG-064|3CG-173|8CG-004
DGC	LINC02595	7	100	X	p22.33|p11.1	301780 Arylsulfatase C f form 300345 Microphthalmia isolated with coloboma 1 300471 Cubitus valgus with mental retardation and unusual facies 300484 Orofaciodigital syndrome VIII 300716 Mental retardation X-linked 95 300719 Deafness cataract retinitis pigmentosa and sperm abnormalities 300864 Cerebral-cerebellar-coloboma syndrome X-linked 309050 Lutheran suppressor X-linked 301067 Family with seq…	NA	1CG-001|3CG-035|3CG-042|3CG-047|3CG-064|3CG-173|8CG-004
DGC	LINC02601	7	100	X	p22.33|p11.1	301780 Arylsulfatase C f form 300345 Microphthalmia isolated with coloboma 1 300471 Cubitus valgus with mental retardation and unusual facies 300484 Orofaciodigital syndrome VIII 300716 Mental retardation X-linked 95 300719 Deafness cataract retinitis pigmentosa and sperm abnormalities 300864 Cerebral-cerebellar-coloboma syndrome X-linked 309050 Lutheran suppressor X-linked 301067 Family with seq…	NA	1CG-001|3CG-035|3CG-042|3CG-047|3CG-064|3CG-173|8CG-004
DGC	LOC100126447	7	100	X	q11.1|q28	300345 Microphthalmia isolated with coloboma 1 300471 Cubitus valgus with mental retardation and unusual facies 300484 Orofaciodigital syndrome VIII 300716 Mental retardation X-linked 95 300719 Deafness cataract retinitis pigmentosa and sperm abnormalities 300864 Cerebral-cerebellar-coloboma syndrome X-linked 309050 Lutheran suppressor X-linked 300010 A-11 gene 300074 X chromosome-controlling ele…	NA	1CG-001|3CG-035|3CG-042|3CG-047|3CG-064|3CG-173|8CG-004
DGC	LOC100129291	7	100	X	q11.1|q28	300345 Microphthalmia isolated with coloboma 1 300471 Cubitus valgus with mental retardation and unusual facies 300484 Orofaciodigital syndrome VIII 300716 Mental retardation X-linked 95 300719 Deafness cataract retinitis pigmentosa and sperm abnormalities 300864 Cerebral-cerebellar-coloboma syndrome X-linked 309050 Lutheran suppressor X-linked 300010 A-11 gene 300074 X chromosome-controlling ele…	NA	1CG-001|3CG-035|3CG-042|3CG-047|3CG-064|3CG-173|8CG-004
DGC	LOC100132741	7	100	X	q11.1|q28	300345 Microphthalmia isolated with coloboma 1 300471 Cubitus valgus with mental retardation and unusual facies 300484 Orofaciodigital syndrome VIII 300716 Mental retardation X-linked 95 300719 Deafness cataract retinitis pigmentosa and sperm abnormalities 300864 Cerebral-cerebellar-coloboma syndrome X-linked 309050 Lutheran suppressor X-linked 300010 A-11 gene 300074 X chromosome-controlling ele…	NA	1CG-001|3CG-035|3CG-042|3CG-047|3CG-064|3CG-173|8CG-004
DGC	LOC100421746	7	100	X	p22.33|p11.1	301780 Arylsulfatase C f form 300345 Microphthalmia isolated with coloboma 1 300471 Cubitus valgus with mental retardation and unusual facies 300484 Orofaciodigital syndrome VIII 300716 Mental retardation X-linked 95 300719 Deafness cataract retinitis pigmentosa and sperm abnormalities 300864 Cerebral-cerebellar-coloboma syndrome X-linked 309050 Lutheran suppressor X-linked 301067 Family with seq…	NA	1CG-001|3CG-035|3CG-042|3CG-047|3CG-064|3CG-173|8CG-004
DGC	LOC100506790	7	100	X	q11.1|q28	300345 Microphthalmia isolated with coloboma 1 300471 Cubitus valgus with mental retardation and unusual facies 300484 Orofaciodigital syndrome VIII 300716 Mental retardation X-linked 95 300719 Deafness cataract retinitis pigmentosa and sperm abnormalities 300864 Cerebral-cerebellar-coloboma syndrome X-linked 309050 Lutheran suppressor X-linked 300010 A-11 gene 300074 X chromosome-controlling ele…	NA	1CG-001|3CG-035|3CG-042|3CG-047|3CG-064|3CG-173|8CG-004
DGC	LOC101059915	7	100	X	q11.1|q28	300345 Microphthalmia isolated with coloboma 1 300471 Cubitus valgus with mental retardation and unusual facies 300484 Orofaciodigital syndrome VIII 300716 Mental retardation X-linked 95 300719 Deafness cataract retinitis pigmentosa and sperm abnormalities 300864 Cerebral-cerebellar-coloboma syndrome X-linked 309050 Lutheran suppressor X-linked 300010 A-11 gene 300074 X chromosome-controlling ele…	NA	1CG-001|3CG-035|3CG-042|3CG-047|3CG-064|3CG-173|8CG-004
DGC	LOC101927476	7	100	X	p22.33|p11.1	301780 Arylsulfatase C f form 300345 Microphthalmia isolated with coloboma 1 300471 Cubitus valgus with mental retardation and unusual facies 300484 Orofaciodigital syndrome VIII 300716 Mental retardation X-linked 95 300719 Deafness cataract retinitis pigmentosa and sperm abnormalities 300864 Cerebral-cerebellar-coloboma syndrome X-linked 309050 Lutheran suppressor X-linked 301067 Family with seq…	NA	1CG-001|3CG-035|3CG-042|3CG-047|3CG-064|3CG-173|8CG-004
DGC	LOC101927635	7	100	X	p22.33|p11.1	301780 Arylsulfatase C f form 300345 Microphthalmia isolated with coloboma 1 300471 Cubitus valgus with mental retardation and unusual facies 300484 Orofaciodigital syndrome VIII 300716 Mental retardation X-linked 95 300719 Deafness cataract retinitis pigmentosa and sperm abnormalities 300864 Cerebral-cerebellar-coloboma syndrome X-linked 309050 Lutheran suppressor X-linked 301067 Family with seq…	NA	1CG-001|3CG-035|3CG-042|3CG-047|3CG-064|3CG-173|8CG-004
DGC	LOC101927830	7	100	X	q11.1|q28	300345 Microphthalmia isolated with coloboma 1 300471 Cubitus valgus with mental retardation and unusual facies 300484 Orofaciodigital syndrome VIII 300716 Mental retardation X-linked 95 300719 Deafness cataract retinitis pigmentosa and sperm abnormalities 300864 Cerebral-cerebellar-coloboma syndrome X-linked 309050 Lutheran suppressor X-linked 300010 A-11 gene 300074 X chromosome-controlling ele…	NA	1CG-001|3CG-035|3CG-042|3CG-047|3CG-064|3CG-173|8CG-004
DGC	LOC101928128	7	100	X	q11.1|q28	300345 Microphthalmia isolated with coloboma 1 300471 Cubitus valgus with mental retardation and unusual facies 300484 Orofaciodigital syndrome VIII 300716 Mental retardation X-linked 95 300719 Deafness cataract retinitis pigmentosa and sperm abnormalities 300864 Cerebral-cerebellar-coloboma syndrome X-linked 309050 Lutheran suppressor X-linked 300010 A-11 gene 300074 X chromosome-controlling ele…	NA	1CG-001|3CG-035|3CG-042|3CG-047|3CG-064|3CG-173|8CG-004
DGC	LOC101928201	7	100	X	p22.33|p11.1	301780 Arylsulfatase C f form 300345 Microphthalmia isolated with coloboma 1 300471 Cubitus valgus with mental retardation and unusual facies 300484 Orofaciodigital syndrome VIII 300716 Mental retardation X-linked 95 300719 Deafness cataract retinitis pigmentosa and sperm abnormalities 300864 Cerebral-cerebellar-coloboma syndrome X-linked 309050 Lutheran suppressor X-linked 301067 Family with seq…	NA	1CG-001|3CG-035|3CG-042|3CG-047|3CG-064|3CG-173|8CG-004
DGC	LOC101928335	7	100	X	q11.1|q28	300345 Microphthalmia isolated with coloboma 1 300471 Cubitus valgus with mental retardation and unusual facies 300484 Orofaciodigital syndrome VIII 300716 Mental retardation X-linked 95 300719 Deafness cataract retinitis pigmentosa and sperm abnormalities 300864 Cerebral-cerebellar-coloboma syndrome X-linked 309050 Lutheran suppressor X-linked 300010 A-11 gene 300074 X chromosome-controlling ele…	NA	1CG-001|3CG-035|3CG-042|3CG-047|3CG-064|3CG-173|8CG-004
DGC	LOC101928336	7	100	X	q11.1|q28	300345 Microphthalmia isolated with coloboma 1 300471 Cubitus valgus with mental retardation and unusual facies 300484 Orofaciodigital syndrome VIII 300716 Mental retardation X-linked 95 300719 Deafness cataract retinitis pigmentosa and sperm abnormalities 300864 Cerebral-cerebellar-coloboma syndrome X-linked 309050 Lutheran suppressor X-linked 300010 A-11 gene 300074 X chromosome-controlling ele…	NA	1CG-001|3CG-035|3CG-042|3CG-047|3CG-064|3CG-173|8CG-004
DGC	LOC101928358	7	100	X	q11.1|q28	300345 Microphthalmia isolated with coloboma 1 300471 Cubitus valgus with mental retardation and unusual facies 300484 Orofaciodigital syndrome VIII 300716 Mental retardation X-linked 95 300719 Deafness cataract retinitis pigmentosa and sperm abnormalities 300864 Cerebral-cerebellar-coloboma syndrome X-linked 309050 Lutheran suppressor X-linked 300010 A-11 gene 300074 X chromosome-controlling ele…	NA	1CG-001|3CG-035|3CG-042|3CG-047|3CG-064|3CG-173|8CG-004
DGC	LOC101928389	7	100	X	p22.33|p11.1	301780 Arylsulfatase C f form 300345 Microphthalmia isolated with coloboma 1 300471 Cubitus valgus with mental retardation and unusual facies 300484 Orofaciodigital syndrome VIII 300716 Mental retardation X-linked 95 300719 Deafness cataract retinitis pigmentosa and sperm abnormalities 300864 Cerebral-cerebellar-coloboma syndrome X-linked 309050 Lutheran suppressor X-linked 301067 Family with seq…	NA	1CG-001|3CG-035|3CG-042|3CG-047|3CG-064|3CG-173|8CG-004
DGC	LOC101928402	7	100	X	q11.1|q28	300345 Microphthalmia isolated with coloboma 1 300471 Cubitus valgus with mental retardation and unusual facies 300484 Orofaciodigital syndrome VIII 300716 Mental retardation X-linked 95 300719 Deafness cataract retinitis pigmentosa and sperm abnormalities 300864 Cerebral-cerebellar-coloboma syndrome X-linked 309050 Lutheran suppressor X-linked 300010 A-11 gene 300074 X chromosome-controlling ele…	NA	1CG-001|3CG-035|3CG-042|3CG-047|3CG-064|3CG-173|8CG-004
DGC	LOC101928437	7	100	X	q11.1|q28	300345 Microphthalmia isolated with coloboma 1 300471 Cubitus valgus with mental retardation and unusual facies 300484 Orofaciodigital syndrome VIII 300716 Mental retardation X-linked 95 300719 Deafness cataract retinitis pigmentosa and sperm abnormalities 300864 Cerebral-cerebellar-coloboma syndrome X-linked 309050 Lutheran suppressor X-linked 300010 A-11 gene 300074 X chromosome-controlling ele…	NA	1CG-001|3CG-035|3CG-042|3CG-047|3CG-064|3CG-173|8CG-004
DGC	LOC101928495	7	100	X	q11.1|q28	300345 Microphthalmia isolated with coloboma 1 300471 Cubitus valgus with mental retardation and unusual facies 300484 Orofaciodigital syndrome VIII 300716 Mental retardation X-linked 95 300719 Deafness cataract retinitis pigmentosa and sperm abnormalities 300864 Cerebral-cerebellar-coloboma syndrome X-linked 309050 Lutheran suppressor X-linked 300010 A-11 gene 300074 X chromosome-controlling ele…	NA	1CG-001|3CG-035|3CG-042|3CG-047|3CG-064|3CG-173|8CG-004
DGC	LOC101928627	7	100	X	p22.33|p11.1	301780 Arylsulfatase C f form 300345 Microphthalmia isolated with coloboma 1 300471 Cubitus valgus with mental retardation and unusual facies 300484 Orofaciodigital syndrome VIII 300716 Mental retardation X-linked 95 300719 Deafness cataract retinitis pigmentosa and sperm abnormalities 300864 Cerebral-cerebellar-coloboma syndrome X-linked 309050 Lutheran suppressor X-linked 301067 Family with seq…	NA	1CG-001|3CG-035|3CG-042|3CG-047|3CG-064|3CG-173|8CG-004
DGC	LOC105373156	7	100	X	p22.33|p11.1	301780 Arylsulfatase C f form 300345 Microphthalmia isolated with coloboma 1 300471 Cubitus valgus with mental retardation and unusual facies 300484 Orofaciodigital syndrome VIII 300716 Mental retardation X-linked 95 300719 Deafness cataract retinitis pigmentosa and sperm abnormalities 300864 Cerebral-cerebellar-coloboma syndrome X-linked 309050 Lutheran suppressor X-linked 301067 Family with seq…	NA	1CG-001|3CG-035|3CG-042|3CG-047|3CG-064|3CG-173|8CG-004
DGC	LOC105373311	7	100	X	q11.1|q28	300345 Microphthalmia isolated with coloboma 1 300471 Cubitus valgus with mental retardation and unusual facies 300484 Orofaciodigital syndrome VIII 300716 Mental retardation X-linked 95 300719 Deafness cataract retinitis pigmentosa and sperm abnormalities 300864 Cerebral-cerebellar-coloboma syndrome X-linked 309050 Lutheran suppressor X-linked 300010 A-11 gene 300074 X chromosome-controlling ele…	NA	1CG-001|3CG-035|3CG-042|3CG-047|3CG-064|3CG-173|8CG-004
DGC	LOC105373338	7	100	X	q11.1|q28	300345 Microphthalmia isolated with coloboma 1 300471 Cubitus valgus with mental retardation and unusual facies 300484 Orofaciodigital syndrome VIII 300716 Mental retardation X-linked 95 300719 Deafness cataract retinitis pigmentosa and sperm abnormalities 300864 Cerebral-cerebellar-coloboma syndrome X-linked 309050 Lutheran suppressor X-linked 300010 A-11 gene 300074 X chromosome-controlling ele…	NA	1CG-001|3CG-035|3CG-042|3CG-047|3CG-064|3CG-173|8CG-004
DGC	LOC105373378	7	100	X	q11.1|q28	300345 Microphthalmia isolated with coloboma 1 300471 Cubitus valgus with mental retardation and unusual facies 300484 Orofaciodigital syndrome VIII 300716 Mental retardation X-linked 95 300719 Deafness cataract retinitis pigmentosa and sperm abnormalities 300864 Cerebral-cerebellar-coloboma syndrome X-linked 309050 Lutheran suppressor X-linked 300010 A-11 gene 300074 X chromosome-controlling ele…	NA	1CG-001|3CG-035|3CG-042|3CG-047|3CG-064|3CG-173|8CG-004
DGC	LOC105373383	7	100	X	q11.1|q28	300345 Microphthalmia isolated with coloboma 1 300471 Cubitus valgus with mental retardation and unusual facies 300484 Orofaciodigital syndrome VIII 300716 Mental retardation X-linked 95 300719 Deafness cataract retinitis pigmentosa and sperm abnormalities 300864 Cerebral-cerebellar-coloboma syndrome X-linked 309050 Lutheran suppressor X-linked 300010 A-11 gene 300074 X chromosome-controlling ele…	NA	1CG-001|3CG-035|3CG-042|3CG-047|3CG-064|3CG-173|8CG-004
DGC	LOC105377213	7	100	X	q11.1|q28	300345 Microphthalmia isolated with coloboma 1 300471 Cubitus valgus with mental retardation and unusual facies 300484 Orofaciodigital syndrome VIII 300716 Mental retardation X-linked 95 300719 Deafness cataract retinitis pigmentosa and sperm abnormalities 300864 Cerebral-cerebellar-coloboma syndrome X-linked 309050 Lutheran suppressor X-linked 300010 A-11 gene 300074 X chromosome-controlling ele…	NA	1CG-001|3CG-035|3CG-042|3CG-047|3CG-064|3CG-173|8CG-004
DGC	LOC286437	7	100	X	q11.1|q28	300345 Microphthalmia isolated with coloboma 1 300471 Cubitus valgus with mental retardation and unusual facies 300484 Orofaciodigital syndrome VIII 300716 Mental retardation X-linked 95 300719 Deafness cataract retinitis pigmentosa and sperm abnormalities 300864 Cerebral-cerebellar-coloboma syndrome X-linked 309050 Lutheran suppressor X-linked 300010 A-11 gene 300074 X chromosome-controlling ele…	NA	1CG-001|3CG-035|3CG-042|3CG-047|3CG-064|3CG-173|8CG-004
DGC	LOC389895	7	100	X	q11.1|q28	300345 Microphthalmia isolated with coloboma 1 300471 Cubitus valgus with mental retardation and unusual facies 300484 Orofaciodigital syndrome VIII 300716 Mental retardation X-linked 95 300719 Deafness cataract retinitis pigmentosa and sperm abnormalities 300864 Cerebral-cerebellar-coloboma syndrome X-linked 309050 Lutheran suppressor X-linked 300010 A-11 gene 300074 X chromosome-controlling ele…	NA	1CG-001|3CG-035|3CG-042|3CG-047|3CG-064|3CG-173|8CG-004
DGC	LOC389906	7	100	X	p22.33|p11.1	301780 Arylsulfatase C f form 300345 Microphthalmia isolated with coloboma 1 300471 Cubitus valgus with mental retardation and unusual facies 300484 Orofaciodigital syndrome VIII 300716 Mental retardation X-linked 95 300719 Deafness cataract retinitis pigmentosa and sperm abnormalities 300864 Cerebral-cerebellar-coloboma syndrome X-linked 309050 Lutheran suppressor X-linked 301067 Family with seq…	NA	1CG-001|3CG-035|3CG-042|3CG-047|3CG-064|3CG-173|8CG-004
DGC	LOC645188	7	100	X	q11.1|q28	300345 Microphthalmia isolated with coloboma 1 300471 Cubitus valgus with mental retardation and unusual facies 300484 Orofaciodigital syndrome VIII 300716 Mental retardation X-linked 95 300719 Deafness cataract retinitis pigmentosa and sperm abnormalities 300864 Cerebral-cerebellar-coloboma syndrome X-linked 309050 Lutheran suppressor X-linked 300010 A-11 gene 300074 X chromosome-controlling ele…	NA	1CG-001|3CG-035|3CG-042|3CG-047|3CG-064|3CG-173|8CG-004
DGC	LOC728660	7	100	X	q11.1|q28	300345 Microphthalmia isolated with coloboma 1 300471 Cubitus valgus with mental retardation and unusual facies 300484 Orofaciodigital syndrome VIII 300716 Mental retardation X-linked 95 300719 Deafness cataract retinitis pigmentosa and sperm abnormalities 300864 Cerebral-cerebellar-coloboma syndrome X-linked 309050 Lutheran suppressor X-linked 300010 A-11 gene 300074 X chromosome-controlling ele…	NA	1CG-001|3CG-035|3CG-042|3CG-047|3CG-064|3CG-173|8CG-004
DGC	LOC729609	7	100	X	p22.33|p11.1	301780 Arylsulfatase C f form 300345 Microphthalmia isolated with coloboma 1 300471 Cubitus valgus with mental retardation and unusual facies 300484 Orofaciodigital syndrome VIII 300716 Mental retardation X-linked 95 300719 Deafness cataract retinitis pigmentosa and sperm abnormalities 300864 Cerebral-cerebellar-coloboma syndrome X-linked 309050 Lutheran suppressor X-linked 301067 Family with seq…	NA	1CG-001|3CG-035|3CG-042|3CG-047|3CG-064|3CG-173|8CG-004
DGC	LONRF3	7	100	X	q11.1|q28	300345 Microphthalmia isolated with coloboma 1 300471 Cubitus valgus with mental retardation and unusual facies 300484 Orofaciodigital syndrome VIII 300716 Mental retardation X-linked 95 300719 Deafness cataract retinitis pigmentosa and sperm abnormalities 300864 Cerebral-cerebellar-coloboma syndrome X-linked 309050 Lutheran suppressor X-linked 300010 A-11 gene 300074 X chromosome-controlling ele…	LONRF3|0.061132567|59.54%	1CG-001|3CG-035|3CG-042|3CG-047|3CG-064|3CG-173|8CG-004
DGC	LPAR4	7	100	X	q11.1|q28	300345 Microphthalmia isolated with coloboma 1 300471 Cubitus valgus with mental retardation and unusual facies 300484 Orofaciodigital syndrome VIII 300716 Mental retardation X-linked 95 300719 Deafness cataract retinitis pigmentosa and sperm abnormalities 300864 Cerebral-cerebellar-coloboma syndrome X-linked 309050 Lutheran suppressor X-linked 300010 A-11 gene 300074 X chromosome-controlling ele…	LPAR4|0.259757064|30.76%	1CG-001|3CG-035|3CG-042|3CG-047|3CG-064|3CG-173|8CG-004
DGC	LRCH2	7	100	X	q11.1|q28	300345 Microphthalmia isolated with coloboma 1 300471 Cubitus valgus with mental retardation and unusual facies 300484 Orofaciodigital syndrome VIII 300716 Mental retardation X-linked 95 300719 Deafness cataract retinitis pigmentosa and sperm abnormalities 300864 Cerebral-cerebellar-coloboma syndrome X-linked 309050 Lutheran suppressor X-linked 300010 A-11 gene 300074 X chromosome-controlling ele…	LRCH2|0.349596138|24.16%	1CG-001|3CG-035|3CG-042|3CG-047|3CG-064|3CG-173|8CG-004
DGC	LUZP4	7	100	X	q11.1|q28	300345 Microphthalmia isolated with coloboma 1 300471 Cubitus valgus with mental retardation and unusual facies 300484 Orofaciodigital syndrome VIII 300716 Mental retardation X-linked 95 300719 Deafness cataract retinitis pigmentosa and sperm abnormalities 300864 Cerebral-cerebellar-coloboma syndrome X-linked 309050 Lutheran suppressor X-linked 300010 A-11 gene 300074 X chromosome-controlling ele…	LUZP4|0.000404323|98.92%	1CG-001|3CG-035|3CG-042|3CG-047|3CG-064|3CG-173|8CG-004
DGC	MAGEA1	7	100	X	q11.1|q28	300345 Microphthalmia isolated with coloboma 1 300471 Cubitus valgus with mental retardation and unusual facies 300484 Orofaciodigital syndrome VIII 300716 Mental retardation X-linked 95 300719 Deafness cataract retinitis pigmentosa and sperm abnormalities 300864 Cerebral-cerebellar-coloboma syndrome X-linked 309050 Lutheran suppressor X-linked 300010 A-11 gene 300074 X chromosome-controlling ele…	MAGEA1|0.001650102|92.12%	1CG-001|3CG-035|3CG-042|3CG-047|3CG-064|3CG-173|8CG-004
DGC	MAGEA10	7	100	X	q11.1|q28	300345 Microphthalmia isolated with coloboma 1 300471 Cubitus valgus with mental retardation and unusual facies 300484 Orofaciodigital syndrome VIII 300716 Mental retardation X-linked 95 300719 Deafness cataract retinitis pigmentosa and sperm abnormalities 300864 Cerebral-cerebellar-coloboma syndrome X-linked 309050 Lutheran suppressor X-linked 300010 A-11 gene 300074 X chromosome-controlling ele…	MAGEA10|0.000454799|98.66%	1CG-001|3CG-035|3CG-042|3CG-047|3CG-064|3CG-173|8CG-004
DGC	MAGEA10-MAGEA5	7	100	X	q11.1|q28	300345 Microphthalmia isolated with coloboma 1 300471 Cubitus valgus with mental retardation and unusual facies 300484 Orofaciodigital syndrome VIII 300716 Mental retardation X-linked 95 300719 Deafness cataract retinitis pigmentosa and sperm abnormalities 300864 Cerebral-cerebellar-coloboma syndrome X-linked 309050 Lutheran suppressor X-linked 300010 A-11 gene 300074 X chromosome-controlling ele…	NA	1CG-001|3CG-035|3CG-042|3CG-047|3CG-064|3CG-173|8CG-004
DGC	MAGEA11	7	100	X	q11.1|q28	300345 Microphthalmia isolated with coloboma 1 300471 Cubitus valgus with mental retardation and unusual facies 300484 Orofaciodigital syndrome VIII 300716 Mental retardation X-linked 95 300719 Deafness cataract retinitis pigmentosa and sperm abnormalities 300864 Cerebral-cerebellar-coloboma syndrome X-linked 309050 Lutheran suppressor X-linked 300010 A-11 gene 300074 X chromosome-controlling ele…	MAGEA11|0.000964761|95.69%	1CG-001|3CG-035|3CG-042|3CG-047|3CG-064|3CG-173|8CG-004
DGC	MAGEA12	7	100	X	q11.1|q28	300345 Microphthalmia isolated with coloboma 1 300471 Cubitus valgus with mental retardation and unusual facies 300484 Orofaciodigital syndrome VIII 300716 Mental retardation X-linked 95 300719 Deafness cataract retinitis pigmentosa and sperm abnormalities 300864 Cerebral-cerebellar-coloboma syndrome X-linked 309050 Lutheran suppressor X-linked 300010 A-11 gene 300074 X chromosome-controlling ele…	MAGEA12|0.001491193|92.81%	1CG-001|3CG-035|3CG-042|3CG-047|3CG-064|3CG-173|8CG-004
DGC	MAGEA2	7	100	X	q11.1|q28	300345 Microphthalmia isolated with coloboma 1 300471 Cubitus valgus with mental retardation and unusual facies 300484 Orofaciodigital syndrome VIII 300716 Mental retardation X-linked 95 300719 Deafness cataract retinitis pigmentosa and sperm abnormalities 300864 Cerebral-cerebellar-coloboma syndrome X-linked 309050 Lutheran suppressor X-linked 300010 A-11 gene 300074 X chromosome-controlling ele…	MAGEA2|0.001656565|92.07%	1CG-001|3CG-035|3CG-042|3CG-047|3CG-064|3CG-173|8CG-004
DGC	MAGEA2B	7	100	X	q11.1|q28	300345 Microphthalmia isolated with coloboma 1 300471 Cubitus valgus with mental retardation and unusual facies 300484 Orofaciodigital syndrome VIII 300716 Mental retardation X-linked 95 300719 Deafness cataract retinitis pigmentosa and sperm abnormalities 300864 Cerebral-cerebellar-coloboma syndrome X-linked 309050 Lutheran suppressor X-linked 300010 A-11 gene 300074 X chromosome-controlling ele…	MAGEA2B|0.000789811|96.73%	1CG-001|3CG-035|3CG-042|3CG-047|3CG-064|3CG-173|8CG-004
DGC	MAGEA3	7	100	X	q11.1|q28	300345 Microphthalmia isolated with coloboma 1 300471 Cubitus valgus with mental retardation and unusual facies 300484 Orofaciodigital syndrome VIII 300716 Mental retardation X-linked 95 300719 Deafness cataract retinitis pigmentosa and sperm abnormalities 300864 Cerebral-cerebellar-coloboma syndrome X-linked 309050 Lutheran suppressor X-linked 300010 A-11 gene 300074 X chromosome-controlling ele…	MAGEA3|0.00061519|97.82%	1CG-001|3CG-035|3CG-042|3CG-047|3CG-064|3CG-173|8CG-004
DGC	MAGEA4	7	100	X	q11.1|q28	300345 Microphthalmia isolated with coloboma 1 300471 Cubitus valgus with mental retardation and unusual facies 300484 Orofaciodigital syndrome VIII 300716 Mental retardation X-linked 95 300719 Deafness cataract retinitis pigmentosa and sperm abnormalities 300864 Cerebral-cerebellar-coloboma syndrome X-linked 309050 Lutheran suppressor X-linked 300010 A-11 gene 300074 X chromosome-controlling ele…	MAGEA4|0.000422797|98.83%	1CG-001|3CG-035|3CG-042|3CG-047|3CG-064|3CG-173|8CG-004
DGC	MAGEA4-AS1	7	100	X	q11.1|q28	300345 Microphthalmia isolated with coloboma 1 300471 Cubitus valgus with mental retardation and unusual facies 300484 Orofaciodigital syndrome VIII 300716 Mental retardation X-linked 95 300719 Deafness cataract retinitis pigmentosa and sperm abnormalities 300864 Cerebral-cerebellar-coloboma syndrome X-linked 309050 Lutheran suppressor X-linked 300010 A-11 gene 300074 X chromosome-controlling ele…	NA	1CG-001|3CG-035|3CG-042|3CG-047|3CG-064|3CG-173|8CG-004
DGC	MAGEA5	7	100	X	q11.1|q28	300345 Microphthalmia isolated with coloboma 1 300471 Cubitus valgus with mental retardation and unusual facies 300484 Orofaciodigital syndrome VIII 300716 Mental retardation X-linked 95 300719 Deafness cataract retinitis pigmentosa and sperm abnormalities 300864 Cerebral-cerebellar-coloboma syndrome X-linked 309050 Lutheran suppressor X-linked 300010 A-11 gene 300074 X chromosome-controlling ele…	NA	1CG-001|3CG-035|3CG-042|3CG-047|3CG-064|3CG-173|8CG-004
DGC	MAGEA6	7	100	X	q11.1|q28	300345 Microphthalmia isolated with coloboma 1 300471 Cubitus valgus with mental retardation and unusual facies 300484 Orofaciodigital syndrome VIII 300716 Mental retardation X-linked 95 300719 Deafness cataract retinitis pigmentosa and sperm abnormalities 300864 Cerebral-cerebellar-coloboma syndrome X-linked 309050 Lutheran suppressor X-linked 300010 A-11 gene 300074 X chromosome-controlling ele…	MAGEA6|0.001153061|94.7%	1CG-001|3CG-035|3CG-042|3CG-047|3CG-064|3CG-173|8CG-004
DGC	MAGEA8	7	100	X	q11.1|q28	300345 Microphthalmia isolated with coloboma 1 300471 Cubitus valgus with mental retardation and unusual facies 300484 Orofaciodigital syndrome VIII 300716 Mental retardation X-linked 95 300719 Deafness cataract retinitis pigmentosa and sperm abnormalities 300864 Cerebral-cerebellar-coloboma syndrome X-linked 309050 Lutheran suppressor X-linked 300010 A-11 gene 300074 X chromosome-controlling ele…	MAGEA8|0.000903726|96%	1CG-001|3CG-035|3CG-042|3CG-047|3CG-064|3CG-173|8CG-004
DGC	MAGEA8-AS1	7	100	X	q11.1|q28	300345 Microphthalmia isolated with coloboma 1 300471 Cubitus valgus with mental retardation and unusual facies 300484 Orofaciodigital syndrome VIII 300716 Mental retardation X-linked 95 300719 Deafness cataract retinitis pigmentosa and sperm abnormalities 300864 Cerebral-cerebellar-coloboma syndrome X-linked 309050 Lutheran suppressor X-linked 300010 A-11 gene 300074 X chromosome-controlling ele…	NA	1CG-001|3CG-035|3CG-042|3CG-047|3CG-064|3CG-173|8CG-004
DGC	MAGEA9	7	100	X	q11.1|q28	300345 Microphthalmia isolated with coloboma 1 300471 Cubitus valgus with mental retardation and unusual facies 300484 Orofaciodigital syndrome VIII 300716 Mental retardation X-linked 95 300719 Deafness cataract retinitis pigmentosa and sperm abnormalities 300864 Cerebral-cerebellar-coloboma syndrome X-linked 309050 Lutheran suppressor X-linked 300010 A-11 gene 300074 X chromosome-controlling ele…	MAGEA9|0.000776411|96.82%	1CG-001|3CG-035|3CG-042|3CG-047|3CG-064|3CG-173|8CG-004
DGC	MAGEA9B	7	100	X	q11.1|q28	300345 Microphthalmia isolated with coloboma 1 300471 Cubitus valgus with mental retardation and unusual facies 300484 Orofaciodigital syndrome VIII 300716 Mental retardation X-linked 95 300719 Deafness cataract retinitis pigmentosa and sperm abnormalities 300864 Cerebral-cerebellar-coloboma syndrome X-linked 309050 Lutheran suppressor X-linked 300010 A-11 gene 300074 X chromosome-controlling ele…	MAGEA9B|0.000201307|99.76%	1CG-001|3CG-035|3CG-042|3CG-047|3CG-064|3CG-173|8CG-004
DGC	MAGEB1	7	100	X	p22.33|p11.1	301780 Arylsulfatase C f form 300345 Microphthalmia isolated with coloboma 1 300471 Cubitus valgus with mental retardation and unusual facies 300484 Orofaciodigital syndrome VIII 300716 Mental retardation X-linked 95 300719 Deafness cataract retinitis pigmentosa and sperm abnormalities 300864 Cerebral-cerebellar-coloboma syndrome X-linked 309050 Lutheran suppressor X-linked 301067 Family with seq…	MAGEB1|0.000999368|95.43%	1CG-001|3CG-035|3CG-042|3CG-047|3CG-064|3CG-173|8CG-004
DGC	MAGEB10	7	100	X	p22.33|p11.1	301780 Arylsulfatase C f form 300345 Microphthalmia isolated with coloboma 1 300471 Cubitus valgus with mental retardation and unusual facies 300484 Orofaciodigital syndrome VIII 300716 Mental retardation X-linked 95 300719 Deafness cataract retinitis pigmentosa and sperm abnormalities 300864 Cerebral-cerebellar-coloboma syndrome X-linked 309050 Lutheran suppressor X-linked 301067 Family with seq…	MAGEB10|0.001081716|95%	1CG-001|3CG-035|3CG-042|3CG-047|3CG-064|3CG-173|8CG-004
DGC	MAGEB16	7	100	X	p22.33|p11.1	301780 Arylsulfatase C f form 300345 Microphthalmia isolated with coloboma 1 300471 Cubitus valgus with mental retardation and unusual facies 300484 Orofaciodigital syndrome VIII 300716 Mental retardation X-linked 95 300719 Deafness cataract retinitis pigmentosa and sperm abnormalities 300864 Cerebral-cerebellar-coloboma syndrome X-linked 309050 Lutheran suppressor X-linked 301067 Family with seq…	MAGEB16|0.000965806|95.69%	1CG-001|3CG-035|3CG-042|3CG-047|3CG-064|3CG-173|8CG-004
DGC	MAGEB17	7	100	X	p22.33|p11.1	301780 Arylsulfatase C f form 300345 Microphthalmia isolated with coloboma 1 300471 Cubitus valgus with mental retardation and unusual facies 300484 Orofaciodigital syndrome VIII 300716 Mental retardation X-linked 95 300719 Deafness cataract retinitis pigmentosa and sperm abnormalities 300864 Cerebral-cerebellar-coloboma syndrome X-linked 309050 Lutheran suppressor X-linked 301067 Family with seq…	MAGEB17|0.000890217|96.08%	1CG-001|3CG-035|3CG-042|3CG-047|3CG-064|3CG-173|8CG-004
DGC	MAGEB18	7	100	X	p22.33|p11.1	301780 Arylsulfatase C f form 300345 Microphthalmia isolated with coloboma 1 300471 Cubitus valgus with mental retardation and unusual facies 300484 Orofaciodigital syndrome VIII 300716 Mental retardation X-linked 95 300719 Deafness cataract retinitis pigmentosa and sperm abnormalities 300864 Cerebral-cerebellar-coloboma syndrome X-linked 309050 Lutheran suppressor X-linked 301067 Family with seq…	MAGEB18|0.003279369|88.12%	1CG-001|3CG-035|3CG-042|3CG-047|3CG-064|3CG-173|8CG-004
DGC	MAGEB2	7	100	X	p22.33|p11.1	301780 Arylsulfatase C f form 300345 Microphthalmia isolated with coloboma 1 300471 Cubitus valgus with mental retardation and unusual facies 300484 Orofaciodigital syndrome VIII 300716 Mental retardation X-linked 95 300719 Deafness cataract retinitis pigmentosa and sperm abnormalities 300864 Cerebral-cerebellar-coloboma syndrome X-linked 309050 Lutheran suppressor X-linked 301067 Family with seq…	MAGEB2|0.001317224|93.76%	1CG-001|3CG-035|3CG-042|3CG-047|3CG-064|3CG-173|8CG-004
DGC	MAGEB3	7	100	X	p22.33|p11.1	301780 Arylsulfatase C f form 300345 Microphthalmia isolated with coloboma 1 300471 Cubitus valgus with mental retardation and unusual facies 300484 Orofaciodigital syndrome VIII 300716 Mental retardation X-linked 95 300719 Deafness cataract retinitis pigmentosa and sperm abnormalities 300864 Cerebral-cerebellar-coloboma syndrome X-linked 309050 Lutheran suppressor X-linked 301067 Family with seq…	MAGEB3|0.000858122|96.31%	1CG-001|3CG-035|3CG-042|3CG-047|3CG-064|3CG-173|8CG-004
DGC	MAGEB4	7	100	X	p22.33|p11.1	301780 Arylsulfatase C f form 300345 Microphthalmia isolated with coloboma 1 300471 Cubitus valgus with mental retardation and unusual facies 300484 Orofaciodigital syndrome VIII 300716 Mental retardation X-linked 95 300719 Deafness cataract retinitis pigmentosa and sperm abnormalities 300864 Cerebral-cerebellar-coloboma syndrome X-linked 309050 Lutheran suppressor X-linked 301067 Family with seq…	MAGEB4|0.000425339|98.8%	1CG-001|3CG-035|3CG-042|3CG-047|3CG-064|3CG-173|8CG-004
DGC	MAGEB5	7	100	X	p22.33|p11.1	301780 Arylsulfatase C f form 300345 Microphthalmia isolated with coloboma 1 300471 Cubitus valgus with mental retardation and unusual facies 300484 Orofaciodigital syndrome VIII 300716 Mental retardation X-linked 95 300719 Deafness cataract retinitis pigmentosa and sperm abnormalities 300864 Cerebral-cerebellar-coloboma syndrome X-linked 309050 Lutheran suppressor X-linked 301067 Family with seq…	MAGEB5|0.000406318|98.91%	1CG-001|3CG-035|3CG-042|3CG-047|3CG-064|3CG-173|8CG-004
DGC	MAGEB6	7	100	X	p22.33|p11.1	301780 Arylsulfatase C f form 300345 Microphthalmia isolated with coloboma 1 300471 Cubitus valgus with mental retardation and unusual facies 300484 Orofaciodigital syndrome VIII 300716 Mental retardation X-linked 95 300719 Deafness cataract retinitis pigmentosa and sperm abnormalities 300864 Cerebral-cerebellar-coloboma syndrome X-linked 309050 Lutheran suppressor X-linked 301067 Family with seq…	MAGEB6|0.000465681|98.61%	1CG-001|3CG-035|3CG-042|3CG-047|3CG-064|3CG-173|8CG-004
DGC	MAGEC1	7	100	X	q11.1|q28	300345 Microphthalmia isolated with coloboma 1 300471 Cubitus valgus with mental retardation and unusual facies 300484 Orofaciodigital syndrome VIII 300716 Mental retardation X-linked 95 300719 Deafness cataract retinitis pigmentosa and sperm abnormalities 300864 Cerebral-cerebellar-coloboma syndrome X-linked 309050 Lutheran suppressor X-linked 300010 A-11 gene 300074 X chromosome-controlling ele…	MAGEC1|0.000995741|95.47%	1CG-001|3CG-035|3CG-042|3CG-047|3CG-064|3CG-173|8CG-004
DGC	MAGEC2	7	100	X	q11.1|q28	300345 Microphthalmia isolated with coloboma 1 300471 Cubitus valgus with mental retardation and unusual facies 300484 Orofaciodigital syndrome VIII 300716 Mental retardation X-linked 95 300719 Deafness cataract retinitis pigmentosa and sperm abnormalities 300864 Cerebral-cerebellar-coloboma syndrome X-linked 309050 Lutheran suppressor X-linked 300010 A-11 gene 300074 X chromosome-controlling ele…	MAGEC2|0.00112702|94.81%	1CG-001|3CG-035|3CG-042|3CG-047|3CG-064|3CG-173|8CG-004
DGC	MAGEC3	7	100	X	q11.1|q28	300345 Microphthalmia isolated with coloboma 1 300471 Cubitus valgus with mental retardation and unusual facies 300484 Orofaciodigital syndrome VIII 300716 Mental retardation X-linked 95 300719 Deafness cataract retinitis pigmentosa and sperm abnormalities 300864 Cerebral-cerebellar-coloboma syndrome X-linked 309050 Lutheran suppressor X-linked 300010 A-11 gene 300074 X chromosome-controlling ele…	MAGEC3|0.000974674|95.61%	1CG-001|3CG-035|3CG-042|3CG-047|3CG-064|3CG-173|8CG-004
DGC	MAGED1	7	100	X	p22.33|p11.1	301780 Arylsulfatase C f form 300345 Microphthalmia isolated with coloboma 1 300471 Cubitus valgus with mental retardation and unusual facies 300484 Orofaciodigital syndrome VIII 300716 Mental retardation X-linked 95 300719 Deafness cataract retinitis pigmentosa and sperm abnormalities 300864 Cerebral-cerebellar-coloboma syndrome X-linked 309050 Lutheran suppressor X-linked 301067 Family with seq…	MAGED1|0.091833401|52.85%	1CG-001|3CG-035|3CG-042|3CG-047|3CG-064|3CG-173|8CG-004
DGC	MAGED2	7	100	X	p22.33|p11.1	301780 Arylsulfatase C f form 300345 Microphthalmia isolated with coloboma 1 300471 Cubitus valgus with mental retardation and unusual facies 300484 Orofaciodigital syndrome VIII 300716 Mental retardation X-linked 95 300719 Deafness cataract retinitis pigmentosa and sperm abnormalities 300864 Cerebral-cerebellar-coloboma syndrome X-linked 309050 Lutheran suppressor X-linked 301067 Family with seq…	MAGED2|0.065752049|58.42%	1CG-001|3CG-035|3CG-042|3CG-047|3CG-064|3CG-173|8CG-004
DGC	MAGED4	7	100	X	p22.33|p11.1	301780 Arylsulfatase C f form 300345 Microphthalmia isolated with coloboma 1 300471 Cubitus valgus with mental retardation and unusual facies 300484 Orofaciodigital syndrome VIII 300716 Mental retardation X-linked 95 300719 Deafness cataract retinitis pigmentosa and sperm abnormalities 300864 Cerebral-cerebellar-coloboma syndrome X-linked 309050 Lutheran suppressor X-linked 301067 Family with seq…	MAGED4|0.010727969|80.34%	1CG-001|3CG-035|3CG-042|3CG-047|3CG-064|3CG-173|8CG-004
DGC	MAGED4B	7	100	X	p22.33|p11.1	301780 Arylsulfatase C f form 300345 Microphthalmia isolated with coloboma 1 300471 Cubitus valgus with mental retardation and unusual facies 300484 Orofaciodigital syndrome VIII 300716 Mental retardation X-linked 95 300719 Deafness cataract retinitis pigmentosa and sperm abnormalities 300864 Cerebral-cerebellar-coloboma syndrome X-linked 309050 Lutheran suppressor X-linked 301067 Family with seq…	MAGED4B|0.004696122|86.22%	1CG-001|3CG-035|3CG-042|3CG-047|3CG-064|3CG-173|8CG-004
DGC	MAGEE1	7	100	X	q11.1|q28	300345 Microphthalmia isolated with coloboma 1 300471 Cubitus valgus with mental retardation and unusual facies 300484 Orofaciodigital syndrome VIII 300716 Mental retardation X-linked 95 300719 Deafness cataract retinitis pigmentosa and sperm abnormalities 300864 Cerebral-cerebellar-coloboma syndrome X-linked 309050 Lutheran suppressor X-linked 300010 A-11 gene 300074 X chromosome-controlling ele…	MAGEE1|0.007752064|82.81%	1CG-001|3CG-035|3CG-042|3CG-047|3CG-064|3CG-173|8CG-004
DGC	MAGEE2	7	100	X	q11.1|q28	300345 Microphthalmia isolated with coloboma 1 300471 Cubitus valgus with mental retardation and unusual facies 300484 Orofaciodigital syndrome VIII 300716 Mental retardation X-linked 95 300719 Deafness cataract retinitis pigmentosa and sperm abnormalities 300864 Cerebral-cerebellar-coloboma syndrome X-linked 309050 Lutheran suppressor X-linked 300010 A-11 gene 300074 X chromosome-controlling ele…	MAGEE2|0.008225051|82.44%	1CG-001|3CG-035|3CG-042|3CG-047|3CG-064|3CG-173|8CG-004
DGC	MAGEH1	7	100	X	p22.33|p11.1	301780 Arylsulfatase C f form 300345 Microphthalmia isolated with coloboma 1 300471 Cubitus valgus with mental retardation and unusual facies 300484 Orofaciodigital syndrome VIII 300716 Mental retardation X-linked 95 300719 Deafness cataract retinitis pigmentosa and sperm abnormalities 300864 Cerebral-cerebellar-coloboma syndrome X-linked 309050 Lutheran suppressor X-linked 301067 Family with seq…	MAGEH1|0.01509664|77.09%	1CG-001|3CG-035|3CG-042|3CG-047|3CG-064|3CG-173|8CG-004
DGC	MAGIX	7	100	X	p22.33|p11.1	301780 Arylsulfatase C f form 300345 Microphthalmia isolated with coloboma 1 300471 Cubitus valgus with mental retardation and unusual facies 300484 Orofaciodigital syndrome VIII 300716 Mental retardation X-linked 95 300719 Deafness cataract retinitis pigmentosa and sperm abnormalities 300864 Cerebral-cerebellar-coloboma syndrome X-linked 309050 Lutheran suppressor X-linked 301067 Family with seq…	MAGIX|0.00315296|88.39%	1CG-001|3CG-035|3CG-042|3CG-047|3CG-064|3CG-173|8CG-004
DGC	MAGT1	7	100	X	q11.1|q28	300345 Microphthalmia isolated with coloboma 1 300471 Cubitus valgus with mental retardation and unusual facies 300484 Orofaciodigital syndrome VIII 300716 Mental retardation X-linked 95 300719 Deafness cataract retinitis pigmentosa and sperm abnormalities 300864 Cerebral-cerebellar-coloboma syndrome X-linked 309050 Lutheran suppressor X-linked 300010 A-11 gene 300074 X chromosome-controlling ele…	MAGT1|0.220913711|34.31%	1CG-001|3CG-035|3CG-042|3CG-047|3CG-064|3CG-173|8CG-004
DGC	MAMLD1	7	100	X	q11.1|q28	300345 Microphthalmia isolated with coloboma 1 300471 Cubitus valgus with mental retardation and unusual facies 300484 Orofaciodigital syndrome VIII 300716 Mental retardation X-linked 95 300719 Deafness cataract retinitis pigmentosa and sperm abnormalities 300864 Cerebral-cerebellar-coloboma syndrome X-linked 309050 Lutheran suppressor X-linked 300010 A-11 gene 300074 X chromosome-controlling ele…	MAMLD1|0.025037852|71.77%	1CG-001|3CG-035|3CG-042|3CG-047|3CG-064|3CG-173|8CG-004
DGC	MAOA	7	100	X	p22.33|p11.1	301780 Arylsulfatase C f form 300345 Microphthalmia isolated with coloboma 1 300471 Cubitus valgus with mental retardation and unusual facies 300484 Orofaciodigital syndrome VIII 300716 Mental retardation X-linked 95 300719 Deafness cataract retinitis pigmentosa and sperm abnormalities 300864 Cerebral-cerebellar-coloboma syndrome X-linked 309050 Lutheran suppressor X-linked 301067 Family with seq…	MAOA|0.148857367|43.16%	1CG-001|3CG-035|3CG-042|3CG-047|3CG-064|3CG-173|8CG-004
DGC	MAOB	7	100	X	p22.33|p11.1	301780 Arylsulfatase C f form 300345 Microphthalmia isolated with coloboma 1 300471 Cubitus valgus with mental retardation and unusual facies 300484 Orofaciodigital syndrome VIII 300716 Mental retardation X-linked 95 300719 Deafness cataract retinitis pigmentosa and sperm abnormalities 300864 Cerebral-cerebellar-coloboma syndrome X-linked 309050 Lutheran suppressor X-linked 301067 Family with seq…	MAOB|0.483006623|16.59%	1CG-001|3CG-035|3CG-042|3CG-047|3CG-064|3CG-173|8CG-004
DGC	MAP2K4P1	7	100	X	q11.1|q28	300345 Microphthalmia isolated with coloboma 1 300471 Cubitus valgus with mental retardation and unusual facies 300484 Orofaciodigital syndrome VIII 300716 Mental retardation X-linked 95 300719 Deafness cataract retinitis pigmentosa and sperm abnormalities 300864 Cerebral-cerebellar-coloboma syndrome X-linked 309050 Lutheran suppressor X-linked 300010 A-11 gene 300074 X chromosome-controlling ele…	NA	1CG-001|3CG-035|3CG-042|3CG-047|3CG-064|3CG-173|8CG-004
DGC	MAP3K15	7	100	X	p22.33|p11.1	301780 Arylsulfatase C f form 300345 Microphthalmia isolated with coloboma 1 300471 Cubitus valgus with mental retardation and unusual facies 300484 Orofaciodigital syndrome VIII 300716 Mental retardation X-linked 95 300719 Deafness cataract retinitis pigmentosa and sperm abnormalities 300864 Cerebral-cerebellar-coloboma syndrome X-linked 309050 Lutheran suppressor X-linked 301067 Family with seq…	MAP3K15|0.054956774|61.21%	1CG-001|3CG-035|3CG-042|3CG-047|3CG-064|3CG-173|8CG-004
DGC	MAP7D2	7	100	X	p22.33|p11.1	301780 Arylsulfatase C f form 300345 Microphthalmia isolated with coloboma 1 300471 Cubitus valgus with mental retardation and unusual facies 300484 Orofaciodigital syndrome VIII 300716 Mental retardation X-linked 95 300719 Deafness cataract retinitis pigmentosa and sperm abnormalities 300864 Cerebral-cerebellar-coloboma syndrome X-linked 309050 Lutheran suppressor X-linked 301067 Family with seq…	MAP7D2|0.066731021|58.21%	1CG-001|3CG-035|3CG-042|3CG-047|3CG-064|3CG-173|8CG-004
DGC	MAP7D3	7	100	X	q11.1|q28	300345 Microphthalmia isolated with coloboma 1 300471 Cubitus valgus with mental retardation and unusual facies 300484 Orofaciodigital syndrome VIII 300716 Mental retardation X-linked 95 300719 Deafness cataract retinitis pigmentosa and sperm abnormalities 300864 Cerebral-cerebellar-coloboma syndrome X-linked 309050 Lutheran suppressor X-linked 300010 A-11 gene 300074 X chromosome-controlling ele…	MAP7D3|0.000285035|99.47%	1CG-001|3CG-035|3CG-042|3CG-047|3CG-064|3CG-173|8CG-004
DGC	MBNL3	7	100	X	q11.1|q28	300345 Microphthalmia isolated with coloboma 1 300471 Cubitus valgus with mental retardation and unusual facies 300484 Orofaciodigital syndrome VIII 300716 Mental retardation X-linked 95 300719 Deafness cataract retinitis pigmentosa and sperm abnormalities 300864 Cerebral-cerebellar-coloboma syndrome X-linked 309050 Lutheran suppressor X-linked 300010 A-11 gene 300074 X chromosome-controlling ele…	MBNL3|0.35556257|23.78%	1CG-001|3CG-035|3CG-042|3CG-047|3CG-064|3CG-173|8CG-004
DGC	MBTPS2	7	100	X	p22.33|p11.1	301780 Arylsulfatase C f form 300345 Microphthalmia isolated with coloboma 1 300471 Cubitus valgus with mental retardation and unusual facies 300484 Orofaciodigital syndrome VIII 300716 Mental retardation X-linked 95 300719 Deafness cataract retinitis pigmentosa and sperm abnormalities 300864 Cerebral-cerebellar-coloboma syndrome X-linked 309050 Lutheran suppressor X-linked 301067 Family with seq…	MBTPS2|0.462378865|17.54%	1CG-001|3CG-035|3CG-042|3CG-047|3CG-064|3CG-173|8CG-004
DGC	MCF2	7	100	X	q11.1|q28	300345 Microphthalmia isolated with coloboma 1 300471 Cubitus valgus with mental retardation and unusual facies 300484 Orofaciodigital syndrome VIII 300716 Mental retardation X-linked 95 300719 Deafness cataract retinitis pigmentosa and sperm abnormalities 300864 Cerebral-cerebellar-coloboma syndrome X-linked 309050 Lutheran suppressor X-linked 300010 A-11 gene 300074 X chromosome-controlling ele…	MCF2|0.187938823|38.06%	1CG-001|3CG-035|3CG-042|3CG-047|3CG-064|3CG-173|8CG-004
DGC	MCTS1	7	100	X	q11.1|q28	300345 Microphthalmia isolated with coloboma 1 300471 Cubitus valgus with mental retardation and unusual facies 300484 Orofaciodigital syndrome VIII 300716 Mental retardation X-linked 95 300719 Deafness cataract retinitis pigmentosa and sperm abnormalities 300864 Cerebral-cerebellar-coloboma syndrome X-linked 309050 Lutheran suppressor X-linked 300010 A-11 gene 300074 X chromosome-controlling ele…	MCTS1|0.645943803|10.23%	1CG-001|3CG-035|3CG-042|3CG-047|3CG-064|3CG-173|8CG-004
DGC	MECP2	7	100	X	q11.1|q28	300345 Microphthalmia isolated with coloboma 1 300471 Cubitus valgus with mental retardation and unusual facies 300484 Orofaciodigital syndrome VIII 300716 Mental retardation X-linked 95 300719 Deafness cataract retinitis pigmentosa and sperm abnormalities 300864 Cerebral-cerebellar-coloboma syndrome X-linked 309050 Lutheran suppressor X-linked 300010 A-11 gene 300074 X chromosome-controlling ele…	MECP2|0.982603095|1.39%	1CG-001|3CG-035|3CG-042|3CG-047|3CG-064|3CG-173|8CG-004
DGC	MED12	7	100	X	q11.1|q28	300345 Microphthalmia isolated with coloboma 1 300471 Cubitus valgus with mental retardation and unusual facies 300484 Orofaciodigital syndrome VIII 300716 Mental retardation X-linked 95 300719 Deafness cataract retinitis pigmentosa and sperm abnormalities 300864 Cerebral-cerebellar-coloboma syndrome X-linked 309050 Lutheran suppressor X-linked 300010 A-11 gene 300074 X chromosome-controlling ele…	MED12|0.779576048|6.34%	1CG-001|3CG-035|3CG-042|3CG-047|3CG-064|3CG-173|8CG-004
DGC	MED14	7	100	X	p22.33|p11.1	301780 Arylsulfatase C f form 300345 Microphthalmia isolated with coloboma 1 300471 Cubitus valgus with mental retardation and unusual facies 300484 Orofaciodigital syndrome VIII 300716 Mental retardation X-linked 95 300719 Deafness cataract retinitis pigmentosa and sperm abnormalities 300864 Cerebral-cerebellar-coloboma syndrome X-linked 309050 Lutheran suppressor X-linked 301067 Family with seq…	MED14|0.591701174|12.09%	1CG-001|3CG-035|3CG-042|3CG-047|3CG-064|3CG-173|8CG-004
DGC	MED14OS	7	100	X	p22.33|p11.1	301780 Arylsulfatase C f form 300345 Microphthalmia isolated with coloboma 1 300471 Cubitus valgus with mental retardation and unusual facies 300484 Orofaciodigital syndrome VIII 300716 Mental retardation X-linked 95 300719 Deafness cataract retinitis pigmentosa and sperm abnormalities 300864 Cerebral-cerebellar-coloboma syndrome X-linked 309050 Lutheran suppressor X-linked 301067 Family with seq…	NA	1CG-001|3CG-035|3CG-042|3CG-047|3CG-064|3CG-173|8CG-004
DGC	MFFP3	7	100	X	p22.33|p11.1	301780 Arylsulfatase C f form 300345 Microphthalmia isolated with coloboma 1 300471 Cubitus valgus with mental retardation and unusual facies 300484 Orofaciodigital syndrome VIII 300716 Mental retardation X-linked 95 300719 Deafness cataract retinitis pigmentosa and sperm abnormalities 300864 Cerebral-cerebellar-coloboma syndrome X-linked 309050 Lutheran suppressor X-linked 301067 Family with seq…	NA	1CG-001|3CG-035|3CG-042|3CG-047|3CG-064|3CG-173|8CG-004
DGC	MID1	7	100	X	p22.33|p11.1	301780 Arylsulfatase C f form 300345 Microphthalmia isolated with coloboma 1 300471 Cubitus valgus with mental retardation and unusual facies 300484 Orofaciodigital syndrome VIII 300716 Mental retardation X-linked 95 300719 Deafness cataract retinitis pigmentosa and sperm abnormalities 300864 Cerebral-cerebellar-coloboma syndrome X-linked 309050 Lutheran suppressor X-linked 301067 Family with seq…	MID1|0.828561751|5.13%	1CG-001|3CG-035|3CG-042|3CG-047|3CG-064|3CG-173|8CG-004
DGC	MID1IP1	7	100	X	p22.33|p11.1	301780 Arylsulfatase C f form 300345 Microphthalmia isolated with coloboma 1 300471 Cubitus valgus with mental retardation and unusual facies 300484 Orofaciodigital syndrome VIII 300716 Mental retardation X-linked 95 300719 Deafness cataract retinitis pigmentosa and sperm abnormalities 300864 Cerebral-cerebellar-coloboma syndrome X-linked 309050 Lutheran suppressor X-linked 301067 Family with seq…	MID1IP1|0.224051034|33.95%	1CG-001|3CG-035|3CG-042|3CG-047|3CG-064|3CG-173|8CG-004
DGC	MID1IP1-AS1	7	100	X	p22.33|p11.1	301780 Arylsulfatase C f form 300345 Microphthalmia isolated with coloboma 1 300471 Cubitus valgus with mental retardation and unusual facies 300484 Orofaciodigital syndrome VIII 300716 Mental retardation X-linked 95 300719 Deafness cataract retinitis pigmentosa and sperm abnormalities 300864 Cerebral-cerebellar-coloboma syndrome X-linked 309050 Lutheran suppressor X-linked 301067 Family with seq…	NA	1CG-001|3CG-035|3CG-042|3CG-047|3CG-064|3CG-173|8CG-004
DGC	MID2	7	100	X	q11.1|q28	300345 Microphthalmia isolated with coloboma 1 300471 Cubitus valgus with mental retardation and unusual facies 300484 Orofaciodigital syndrome VIII 300716 Mental retardation X-linked 95 300719 Deafness cataract retinitis pigmentosa and sperm abnormalities 300864 Cerebral-cerebellar-coloboma syndrome X-linked 309050 Lutheran suppressor X-linked 300010 A-11 gene 300074 X chromosome-controlling ele…	MID2|0.667791586|9.45%	1CG-001|3CG-035|3CG-042|3CG-047|3CG-064|3CG-173|8CG-004
DGC	MIR105-1	7	100	X	q11.1|q28	300345 Microphthalmia isolated with coloboma 1 300471 Cubitus valgus with mental retardation and unusual facies 300484 Orofaciodigital syndrome VIII 300716 Mental retardation X-linked 95 300719 Deafness cataract retinitis pigmentosa and sperm abnormalities 300864 Cerebral-cerebellar-coloboma syndrome X-linked 309050 Lutheran suppressor X-linked 300010 A-11 gene 300074 X chromosome-controlling ele…	NA	1CG-001|3CG-035|3CG-042|3CG-047|3CG-064|3CG-173|8CG-004
DGC	MIR105-2	7	100	X	q11.1|q28	300345 Microphthalmia isolated with coloboma 1 300471 Cubitus valgus with mental retardation and unusual facies 300484 Orofaciodigital syndrome VIII 300716 Mental retardation X-linked 95 300719 Deafness cataract retinitis pigmentosa and sperm abnormalities 300864 Cerebral-cerebellar-coloboma syndrome X-linked 309050 Lutheran suppressor X-linked 300010 A-11 gene 300074 X chromosome-controlling ele…	NA	1CG-001|3CG-035|3CG-042|3CG-047|3CG-064|3CG-173|8CG-004
DGC	MIR106A	7	100	X	q11.1|q28	300345 Microphthalmia isolated with coloboma 1 300471 Cubitus valgus with mental retardation and unusual facies 300484 Orofaciodigital syndrome VIII 300716 Mental retardation X-linked 95 300719 Deafness cataract retinitis pigmentosa and sperm abnormalities 300864 Cerebral-cerebellar-coloboma syndrome X-linked 309050 Lutheran suppressor X-linked 300010 A-11 gene 300074 X chromosome-controlling ele…	NA	1CG-001|3CG-035|3CG-042|3CG-047|3CG-064|3CG-173|8CG-004
DGC	MIR1184-1	7	100	X	q11.1|q28	300345 Microphthalmia isolated with coloboma 1 300471 Cubitus valgus with mental retardation and unusual facies 300484 Orofaciodigital syndrome VIII 300716 Mental retardation X-linked 95 300719 Deafness cataract retinitis pigmentosa and sperm abnormalities 300864 Cerebral-cerebellar-coloboma syndrome X-linked 309050 Lutheran suppressor X-linked 300010 A-11 gene 300074 X chromosome-controlling ele…	NA	1CG-001|3CG-035|3CG-042|3CG-047|3CG-064|3CG-173|8CG-004
DGC	MIR1184-2	7	100	X	q11.1|q28	300345 Microphthalmia isolated with coloboma 1 300471 Cubitus valgus with mental retardation and unusual facies 300484 Orofaciodigital syndrome VIII 300716 Mental retardation X-linked 95 300719 Deafness cataract retinitis pigmentosa and sperm abnormalities 300864 Cerebral-cerebellar-coloboma syndrome X-linked 309050 Lutheran suppressor X-linked 300010 A-11 gene 300074 X chromosome-controlling ele…	NA	1CG-001|3CG-035|3CG-042|3CG-047|3CG-064|3CG-173|8CG-004
DGC	MIR1184-3	7	100	X	q11.1|q28	300345 Microphthalmia isolated with coloboma 1 300471 Cubitus valgus with mental retardation and unusual facies 300484 Orofaciodigital syndrome VIII 300716 Mental retardation X-linked 95 300719 Deafness cataract retinitis pigmentosa and sperm abnormalities 300864 Cerebral-cerebellar-coloboma syndrome X-linked 309050 Lutheran suppressor X-linked 300010 A-11 gene 300074 X chromosome-controlling ele…	NA	1CG-001|3CG-035|3CG-042|3CG-047|3CG-064|3CG-173|8CG-004
DGC	MIR12129	7	100	X	q11.1|q28	300345 Microphthalmia isolated with coloboma 1 300471 Cubitus valgus with mental retardation and unusual facies 300484 Orofaciodigital syndrome VIII 300716 Mental retardation X-linked 95 300719 Deafness cataract retinitis pigmentosa and sperm abnormalities 300864 Cerebral-cerebellar-coloboma syndrome X-linked 309050 Lutheran suppressor X-linked 300010 A-11 gene 300074 X chromosome-controlling ele…	NA	1CG-001|3CG-035|3CG-042|3CG-047|3CG-064|3CG-173|8CG-004
DGC	MIR1264	7	100	X	q11.1|q28	300345 Microphthalmia isolated with coloboma 1 300471 Cubitus valgus with mental retardation and unusual facies 300484 Orofaciodigital syndrome VIII 300716 Mental retardation X-linked 95 300719 Deafness cataract retinitis pigmentosa and sperm abnormalities 300864 Cerebral-cerebellar-coloboma syndrome X-linked 309050 Lutheran suppressor X-linked 300010 A-11 gene 300074 X chromosome-controlling ele…	NA	1CG-001|3CG-035|3CG-042|3CG-047|3CG-064|3CG-173|8CG-004
DGC	MIR1277	7	100	X	q11.1|q28	300345 Microphthalmia isolated with coloboma 1 300471 Cubitus valgus with mental retardation and unusual facies 300484 Orofaciodigital syndrome VIII 300716 Mental retardation X-linked 95 300719 Deafness cataract retinitis pigmentosa and sperm abnormalities 300864 Cerebral-cerebellar-coloboma syndrome X-linked 309050 Lutheran suppressor X-linked 300010 A-11 gene 300074 X chromosome-controlling ele…	NA	1CG-001|3CG-035|3CG-042|3CG-047|3CG-064|3CG-173|8CG-004
DGC	MIR1298	7	100	X	q11.1|q28	300345 Microphthalmia isolated with coloboma 1 300471 Cubitus valgus with mental retardation and unusual facies 300484 Orofaciodigital syndrome VIII 300716 Mental retardation X-linked 95 300719 Deafness cataract retinitis pigmentosa and sperm abnormalities 300864 Cerebral-cerebellar-coloboma syndrome X-linked 309050 Lutheran suppressor X-linked 300010 A-11 gene 300074 X chromosome-controlling ele…	NA	1CG-001|3CG-035|3CG-042|3CG-047|3CG-064|3CG-173|8CG-004
DGC	MIR1321	7	100	X	q11.1|q28	300345 Microphthalmia isolated with coloboma 1 300471 Cubitus valgus with mental retardation and unusual facies 300484 Orofaciodigital syndrome VIII 300716 Mental retardation X-linked 95 300719 Deafness cataract retinitis pigmentosa and sperm abnormalities 300864 Cerebral-cerebellar-coloboma syndrome X-linked 309050 Lutheran suppressor X-linked 300010 A-11 gene 300074 X chromosome-controlling ele…	NA	1CG-001|3CG-035|3CG-042|3CG-047|3CG-064|3CG-173|8CG-004
DGC	MIR1468	7	100	X	q11.1|q28	300345 Microphthalmia isolated with coloboma 1 300471 Cubitus valgus with mental retardation and unusual facies 300484 Orofaciodigital syndrome VIII 300716 Mental retardation X-linked 95 300719 Deafness cataract retinitis pigmentosa and sperm abnormalities 300864 Cerebral-cerebellar-coloboma syndrome X-linked 309050 Lutheran suppressor X-linked 300010 A-11 gene 300074 X chromosome-controlling ele…	NA	1CG-001|3CG-035|3CG-042|3CG-047|3CG-064|3CG-173|8CG-004
DGC	MIR1587	7	100	X	p22.33|p11.1	301780 Arylsulfatase C f form 300345 Microphthalmia isolated with coloboma 1 300471 Cubitus valgus with mental retardation and unusual facies 300484 Orofaciodigital syndrome VIII 300716 Mental retardation X-linked 95 300719 Deafness cataract retinitis pigmentosa and sperm abnormalities 300864 Cerebral-cerebellar-coloboma syndrome X-linked 309050 Lutheran suppressor X-linked 301067 Family with seq…	NA	1CG-001|3CG-035|3CG-042|3CG-047|3CG-064|3CG-173|8CG-004
DGC	MIR188	7	100	X	p22.33|p11.1	301780 Arylsulfatase C f form 300345 Microphthalmia isolated with coloboma 1 300471 Cubitus valgus with mental retardation and unusual facies 300484 Orofaciodigital syndrome VIII 300716 Mental retardation X-linked 95 300719 Deafness cataract retinitis pigmentosa and sperm abnormalities 300864 Cerebral-cerebellar-coloboma syndrome X-linked 309050 Lutheran suppressor X-linked 301067 Family with seq…	NA	1CG-001|3CG-035|3CG-042|3CG-047|3CG-064|3CG-173|8CG-004
DGC	MIR18B	7	100	X	q11.1|q28	300345 Microphthalmia isolated with coloboma 1 300471 Cubitus valgus with mental retardation and unusual facies 300484 Orofaciodigital syndrome VIII 300716 Mental retardation X-linked 95 300719 Deafness cataract retinitis pigmentosa and sperm abnormalities 300864 Cerebral-cerebellar-coloboma syndrome X-linked 309050 Lutheran suppressor X-linked 300010 A-11 gene 300074 X chromosome-controlling ele…	NA	1CG-001|3CG-035|3CG-042|3CG-047|3CG-064|3CG-173|8CG-004
DGC	MIR1911	7	100	X	q11.1|q28	300345 Microphthalmia isolated with coloboma 1 300471 Cubitus valgus with mental retardation and unusual facies 300484 Orofaciodigital syndrome VIII 300716 Mental retardation X-linked 95 300719 Deafness cataract retinitis pigmentosa and sperm abnormalities 300864 Cerebral-cerebellar-coloboma syndrome X-linked 309050 Lutheran suppressor X-linked 300010 A-11 gene 300074 X chromosome-controlling ele…	NA	1CG-001|3CG-035|3CG-042|3CG-047|3CG-064|3CG-173|8CG-004
DGC	MIR1912	7	100	X	q11.1|q28	300345 Microphthalmia isolated with coloboma 1 300471 Cubitus valgus with mental retardation and unusual facies 300484 Orofaciodigital syndrome VIII 300716 Mental retardation X-linked 95 300719 Deafness cataract retinitis pigmentosa and sperm abnormalities 300864 Cerebral-cerebellar-coloboma syndrome X-linked 309050 Lutheran suppressor X-linked 300010 A-11 gene 300074 X chromosome-controlling ele…	NA	1CG-001|3CG-035|3CG-042|3CG-047|3CG-064|3CG-173|8CG-004
DGC	MIR19B2	7	100	X	q11.1|q28	300345 Microphthalmia isolated with coloboma 1 300471 Cubitus valgus with mental retardation and unusual facies 300484 Orofaciodigital syndrome VIII 300716 Mental retardation X-linked 95 300719 Deafness cataract retinitis pigmentosa and sperm abnormalities 300864 Cerebral-cerebellar-coloboma syndrome X-linked 309050 Lutheran suppressor X-linked 300010 A-11 gene 300074 X chromosome-controlling ele…	NA	1CG-001|3CG-035|3CG-042|3CG-047|3CG-064|3CG-173|8CG-004
DGC	MIR20B	7	100	X	q11.1|q28	300345 Microphthalmia isolated with coloboma 1 300471 Cubitus valgus with mental retardation and unusual facies 300484 Orofaciodigital syndrome VIII 300716 Mental retardation X-linked 95 300719 Deafness cataract retinitis pigmentosa and sperm abnormalities 300864 Cerebral-cerebellar-coloboma syndrome X-linked 309050 Lutheran suppressor X-linked 300010 A-11 gene 300074 X chromosome-controlling ele…	NA	1CG-001|3CG-035|3CG-042|3CG-047|3CG-064|3CG-173|8CG-004
DGC	MIR2114	7	100	X	q11.1|q28	300345 Microphthalmia isolated with coloboma 1 300471 Cubitus valgus with mental retardation and unusual facies 300484 Orofaciodigital syndrome VIII 300716 Mental retardation X-linked 95 300719 Deafness cataract retinitis pigmentosa and sperm abnormalities 300864 Cerebral-cerebellar-coloboma syndrome X-linked 309050 Lutheran suppressor X-linked 300010 A-11 gene 300074 X chromosome-controlling ele…	NA	1CG-001|3CG-035|3CG-042|3CG-047|3CG-064|3CG-173|8CG-004
DGC	MIR221	7	100	X	p22.33|p11.1	301780 Arylsulfatase C f form 300345 Microphthalmia isolated with coloboma 1 300471 Cubitus valgus with mental retardation and unusual facies 300484 Orofaciodigital syndrome VIII 300716 Mental retardation X-linked 95 300719 Deafness cataract retinitis pigmentosa and sperm abnormalities 300864 Cerebral-cerebellar-coloboma syndrome X-linked 309050 Lutheran suppressor X-linked 301067 Family with seq…	NA	1CG-001|3CG-035|3CG-042|3CG-047|3CG-064|3CG-173|8CG-004
DGC	MIR222	7	100	X	p22.33|p11.1	301780 Arylsulfatase C f form 300345 Microphthalmia isolated with coloboma 1 300471 Cubitus valgus with mental retardation and unusual facies 300484 Orofaciodigital syndrome VIII 300716 Mental retardation X-linked 95 300719 Deafness cataract retinitis pigmentosa and sperm abnormalities 300864 Cerebral-cerebellar-coloboma syndrome X-linked 309050 Lutheran suppressor X-linked 301067 Family with seq…	NA	1CG-001|3CG-035|3CG-042|3CG-047|3CG-064|3CG-173|8CG-004
DGC	MIR223	7	100	X	q11.1|q28	300345 Microphthalmia isolated with coloboma 1 300471 Cubitus valgus with mental retardation and unusual facies 300484 Orofaciodigital syndrome VIII 300716 Mental retardation X-linked 95 300719 Deafness cataract retinitis pigmentosa and sperm abnormalities 300864 Cerebral-cerebellar-coloboma syndrome X-linked 309050 Lutheran suppressor X-linked 300010 A-11 gene 300074 X chromosome-controlling ele…	NA	1CG-001|3CG-035|3CG-042|3CG-047|3CG-064|3CG-173|8CG-004
DGC	MIR224	7	100	X	q11.1|q28	300345 Microphthalmia isolated with coloboma 1 300471 Cubitus valgus with mental retardation and unusual facies 300484 Orofaciodigital syndrome VIII 300716 Mental retardation X-linked 95 300719 Deafness cataract retinitis pigmentosa and sperm abnormalities 300864 Cerebral-cerebellar-coloboma syndrome X-linked 309050 Lutheran suppressor X-linked 300010 A-11 gene 300074 X chromosome-controlling ele…	NA	1CG-001|3CG-035|3CG-042|3CG-047|3CG-064|3CG-173|8CG-004
DGC	MIR23C	7	100	X	p22.33|p11.1	301780 Arylsulfatase C f form 300345 Microphthalmia isolated with coloboma 1 300471 Cubitus valgus with mental retardation and unusual facies 300484 Orofaciodigital syndrome VIII 300716 Mental retardation X-linked 95 300719 Deafness cataract retinitis pigmentosa and sperm abnormalities 300864 Cerebral-cerebellar-coloboma syndrome X-linked 309050 Lutheran suppressor X-linked 301067 Family with seq…	NA	1CG-001|3CG-035|3CG-042|3CG-047|3CG-064|3CG-173|8CG-004
DGC	MIR3202-1	7	100	X	q11.1|q28	300345 Microphthalmia isolated with coloboma 1 300471 Cubitus valgus with mental retardation and unusual facies 300484 Orofaciodigital syndrome VIII 300716 Mental retardation X-linked 95 300719 Deafness cataract retinitis pigmentosa and sperm abnormalities 300864 Cerebral-cerebellar-coloboma syndrome X-linked 309050 Lutheran suppressor X-linked 300010 A-11 gene 300074 X chromosome-controlling ele…	NA	1CG-001|3CG-035|3CG-042|3CG-047|3CG-064|3CG-173|8CG-004
DGC	MIR3202-2	7	100	X	q11.1|q28	300345 Microphthalmia isolated with coloboma 1 300471 Cubitus valgus with mental retardation and unusual facies 300484 Orofaciodigital syndrome VIII 300716 Mental retardation X-linked 95 300719 Deafness cataract retinitis pigmentosa and sperm abnormalities 300864 Cerebral-cerebellar-coloboma syndrome X-linked 309050 Lutheran suppressor X-linked 300010 A-11 gene 300074 X chromosome-controlling ele…	NA	1CG-001|3CG-035|3CG-042|3CG-047|3CG-064|3CG-173|8CG-004
DGC	MIR320D2	7	100	X	q11.1|q28	300345 Microphthalmia isolated with coloboma 1 300471 Cubitus valgus with mental retardation and unusual facies 300484 Orofaciodigital syndrome VIII 300716 Mental retardation X-linked 95 300719 Deafness cataract retinitis pigmentosa and sperm abnormalities 300864 Cerebral-cerebellar-coloboma syndrome X-linked 309050 Lutheran suppressor X-linked 300010 A-11 gene 300074 X chromosome-controlling ele…	NA	1CG-001|3CG-035|3CG-042|3CG-047|3CG-064|3CG-173|8CG-004
DGC	MIR325	7	100	X	q11.1|q28	300345 Microphthalmia isolated with coloboma 1 300471 Cubitus valgus with mental retardation and unusual facies 300484 Orofaciodigital syndrome VIII 300716 Mental retardation X-linked 95 300719 Deafness cataract retinitis pigmentosa and sperm abnormalities 300864 Cerebral-cerebellar-coloboma syndrome X-linked 309050 Lutheran suppressor X-linked 300010 A-11 gene 300074 X chromosome-controlling ele…	NA	1CG-001|3CG-035|3CG-042|3CG-047|3CG-064|3CG-173|8CG-004
DGC	MIR325HG	7	100	X	q11.1|q28	300345 Microphthalmia isolated with coloboma 1 300471 Cubitus valgus with mental retardation and unusual facies 300484 Orofaciodigital syndrome VIII 300716 Mental retardation X-linked 95 300719 Deafness cataract retinitis pigmentosa and sperm abnormalities 300864 Cerebral-cerebellar-coloboma syndrome X-linked 309050 Lutheran suppressor X-linked 300010 A-11 gene 300074 X chromosome-controlling ele…	NA	1CG-001|3CG-035|3CG-042|3CG-047|3CG-064|3CG-173|8CG-004
DGC	MIR361	7	100	X	q11.1|q28	300345 Microphthalmia isolated with coloboma 1 300471 Cubitus valgus with mental retardation and unusual facies 300484 Orofaciodigital syndrome VIII 300716 Mental retardation X-linked 95 300719 Deafness cataract retinitis pigmentosa and sperm abnormalities 300864 Cerebral-cerebellar-coloboma syndrome X-linked 309050 Lutheran suppressor X-linked 300010 A-11 gene 300074 X chromosome-controlling ele…	NA	1CG-001|3CG-035|3CG-042|3CG-047|3CG-064|3CG-173|8CG-004
DGC	MIR362	7	100	X	p22.33|p11.1	301780 Arylsulfatase C f form 300345 Microphthalmia isolated with coloboma 1 300471 Cubitus valgus with mental retardation and unusual facies 300484 Orofaciodigital syndrome VIII 300716 Mental retardation X-linked 95 300719 Deafness cataract retinitis pigmentosa and sperm abnormalities 300864 Cerebral-cerebellar-coloboma syndrome X-linked 309050 Lutheran suppressor X-linked 301067 Family with seq…	NA	1CG-001|3CG-035|3CG-042|3CG-047|3CG-064|3CG-173|8CG-004
DGC	MIR363	7	100	X	q11.1|q28	300345 Microphthalmia isolated with coloboma 1 300471 Cubitus valgus with mental retardation and unusual facies 300484 Orofaciodigital syndrome VIII 300716 Mental retardation X-linked 95 300719 Deafness cataract retinitis pigmentosa and sperm abnormalities 300864 Cerebral-cerebellar-coloboma syndrome X-linked 309050 Lutheran suppressor X-linked 300010 A-11 gene 300074 X chromosome-controlling ele…	NA	1CG-001|3CG-035|3CG-042|3CG-047|3CG-064|3CG-173|8CG-004
DGC	MIR3672	7	100	X	q11.1|q28	300345 Microphthalmia isolated with coloboma 1 300471 Cubitus valgus with mental retardation and unusual facies 300484 Orofaciodigital syndrome VIII 300716 Mental retardation X-linked 95 300719 Deafness cataract retinitis pigmentosa and sperm abnormalities 300864 Cerebral-cerebellar-coloboma syndrome X-linked 309050 Lutheran suppressor X-linked 300010 A-11 gene 300074 X chromosome-controlling ele…	NA	1CG-001|3CG-035|3CG-042|3CG-047|3CG-064|3CG-173|8CG-004
DGC	MIR374A	7	100	X	q11.1|q28	300345 Microphthalmia isolated with coloboma 1 300471 Cubitus valgus with mental retardation and unusual facies 300484 Orofaciodigital syndrome VIII 300716 Mental retardation X-linked 95 300719 Deafness cataract retinitis pigmentosa and sperm abnormalities 300864 Cerebral-cerebellar-coloboma syndrome X-linked 309050 Lutheran suppressor X-linked 300010 A-11 gene 300074 X chromosome-controlling ele…	NA	1CG-001|3CG-035|3CG-042|3CG-047|3CG-064|3CG-173|8CG-004
DGC	MIR374B	7	100	X	q11.1|q28	300345 Microphthalmia isolated with coloboma 1 300471 Cubitus valgus with mental retardation and unusual facies 300484 Orofaciodigital syndrome VIII 300716 Mental retardation X-linked 95 300719 Deafness cataract retinitis pigmentosa and sperm abnormalities 300864 Cerebral-cerebellar-coloboma syndrome X-linked 309050 Lutheran suppressor X-linked 300010 A-11 gene 300074 X chromosome-controlling ele…	NA	1CG-001|3CG-035|3CG-042|3CG-047|3CG-064|3CG-173|8CG-004
DGC	MIR374C	7	100	X	q11.1|q28	300345 Microphthalmia isolated with coloboma 1 300471 Cubitus valgus with mental retardation and unusual facies 300484 Orofaciodigital syndrome VIII 300716 Mental retardation X-linked 95 300719 Deafness cataract retinitis pigmentosa and sperm abnormalities 300864 Cerebral-cerebellar-coloboma syndrome X-linked 309050 Lutheran suppressor X-linked 300010 A-11 gene 300074 X chromosome-controlling ele…	NA	1CG-001|3CG-035|3CG-042|3CG-047|3CG-064|3CG-173|8CG-004
DGC	MIR384	7	100	X	q11.1|q28	300345 Microphthalmia isolated with coloboma 1 300471 Cubitus valgus with mental retardation and unusual facies 300484 Orofaciodigital syndrome VIII 300716 Mental retardation X-linked 95 300719 Deafness cataract retinitis pigmentosa and sperm abnormalities 300864 Cerebral-cerebellar-coloboma syndrome X-linked 309050 Lutheran suppressor X-linked 300010 A-11 gene 300074 X chromosome-controlling ele…	NA	1CG-001|3CG-035|3CG-042|3CG-047|3CG-064|3CG-173|8CG-004
DGC	MIR3915	7	100	X	p22.33|p11.1	301780 Arylsulfatase C f form 300345 Microphthalmia isolated with coloboma 1 300471 Cubitus valgus with mental retardation and unusual facies 300484 Orofaciodigital syndrome VIII 300716 Mental retardation X-linked 95 300719 Deafness cataract retinitis pigmentosa and sperm abnormalities 300864 Cerebral-cerebellar-coloboma syndrome X-linked 309050 Lutheran suppressor X-linked 301067 Family with seq…	NA	1CG-001|3CG-035|3CG-042|3CG-047|3CG-064|3CG-173|8CG-004
DGC	MIR3937	7	100	X	p22.33|p11.1	301780 Arylsulfatase C f form 300345 Microphthalmia isolated with coloboma 1 300471 Cubitus valgus with mental retardation and unusual facies 300484 Orofaciodigital syndrome VIII 300716 Mental retardation X-linked 95 300719 Deafness cataract retinitis pigmentosa and sperm abnormalities 300864 Cerebral-cerebellar-coloboma syndrome X-linked 309050 Lutheran suppressor X-linked 301067 Family with seq…	NA	1CG-001|3CG-035|3CG-042|3CG-047|3CG-064|3CG-173|8CG-004
DGC	MIR3978	7	100	X	q11.1|q28	300345 Microphthalmia isolated with coloboma 1 300471 Cubitus valgus with mental retardation and unusual facies 300484 Orofaciodigital syndrome VIII 300716 Mental retardation X-linked 95 300719 Deafness cataract retinitis pigmentosa and sperm abnormalities 300864 Cerebral-cerebellar-coloboma syndrome X-linked 309050 Lutheran suppressor X-linked 300010 A-11 gene 300074 X chromosome-controlling ele…	NA	1CG-001|3CG-035|3CG-042|3CG-047|3CG-064|3CG-173|8CG-004
DGC	MIR421	7	100	X	q11.1|q28	300345 Microphthalmia isolated with coloboma 1 300471 Cubitus valgus with mental retardation and unusual facies 300484 Orofaciodigital syndrome VIII 300716 Mental retardation X-linked 95 300719 Deafness cataract retinitis pigmentosa and sperm abnormalities 300864 Cerebral-cerebellar-coloboma syndrome X-linked 309050 Lutheran suppressor X-linked 300010 A-11 gene 300074 X chromosome-controlling ele…	NA	1CG-001|3CG-035|3CG-042|3CG-047|3CG-064|3CG-173|8CG-004
DGC	MIR424	7	100	X	q11.1|q28	300345 Microphthalmia isolated with coloboma 1 300471 Cubitus valgus with mental retardation and unusual facies 300484 Orofaciodigital syndrome VIII 300716 Mental retardation X-linked 95 300719 Deafness cataract retinitis pigmentosa and sperm abnormalities 300864 Cerebral-cerebellar-coloboma syndrome X-linked 309050 Lutheran suppressor X-linked 300010 A-11 gene 300074 X chromosome-controlling ele…	NA	1CG-001|3CG-035|3CG-042|3CG-047|3CG-064|3CG-173|8CG-004
DGC	MIR4328	7	100	X	q11.1|q28	300345 Microphthalmia isolated with coloboma 1 300471 Cubitus valgus with mental retardation and unusual facies 300484 Orofaciodigital syndrome VIII 300716 Mental retardation X-linked 95 300719 Deafness cataract retinitis pigmentosa and sperm abnormalities 300864 Cerebral-cerebellar-coloboma syndrome X-linked 309050 Lutheran suppressor X-linked 300010 A-11 gene 300074 X chromosome-controlling ele…	NA	1CG-001|3CG-035|3CG-042|3CG-047|3CG-064|3CG-173|8CG-004
DGC	MIR4329	7	100	X	q11.1|q28	300345 Microphthalmia isolated with coloboma 1 300471 Cubitus valgus with mental retardation and unusual facies 300484 Orofaciodigital syndrome VIII 300716 Mental retardation X-linked 95 300719 Deafness cataract retinitis pigmentosa and sperm abnormalities 300864 Cerebral-cerebellar-coloboma syndrome X-linked 309050 Lutheran suppressor X-linked 300010 A-11 gene 300074 X chromosome-controlling ele…	NA	1CG-001|3CG-035|3CG-042|3CG-047|3CG-064|3CG-173|8CG-004
DGC	MIR4330	7	100	X	q11.1|q28	300345 Microphthalmia isolated with coloboma 1 300471 Cubitus valgus with mental retardation and unusual facies 300484 Orofaciodigital syndrome VIII 300716 Mental retardation X-linked 95 300719 Deafness cataract retinitis pigmentosa and sperm abnormalities 300864 Cerebral-cerebellar-coloboma syndrome X-linked 309050 Lutheran suppressor X-linked 300010 A-11 gene 300074 X chromosome-controlling ele…	NA	1CG-001|3CG-035|3CG-042|3CG-047|3CG-064|3CG-173|8CG-004
DGC	MIR4454	7	100	X	q11.1|q28	300345 Microphthalmia isolated with coloboma 1 300471 Cubitus valgus with mental retardation and unusual facies 300484 Orofaciodigital syndrome VIII 300716 Mental retardation X-linked 95 300719 Deafness cataract retinitis pigmentosa and sperm abnormalities 300864 Cerebral-cerebellar-coloboma syndrome X-linked 309050 Lutheran suppressor X-linked 300010 A-11 gene 300074 X chromosome-controlling ele…	NA	1CG-001|3CG-035|3CG-042|3CG-047|3CG-064|3CG-173|8CG-004
DGC	MIR448	7	100	X	q11.1|q28	300345 Microphthalmia isolated with coloboma 1 300471 Cubitus valgus with mental retardation and unusual facies 300484 Orofaciodigital syndrome VIII 300716 Mental retardation X-linked 95 300719 Deafness cataract retinitis pigmentosa and sperm abnormalities 300864 Cerebral-cerebellar-coloboma syndrome X-linked 309050 Lutheran suppressor X-linked 300010 A-11 gene 300074 X chromosome-controlling ele…	NA	1CG-001|3CG-035|3CG-042|3CG-047|3CG-064|3CG-173|8CG-004
DGC	MIR450A1	7	100	X	q11.1|q28	300345 Microphthalmia isolated with coloboma 1 300471 Cubitus valgus with mental retardation and unusual facies 300484 Orofaciodigital syndrome VIII 300716 Mental retardation X-linked 95 300719 Deafness cataract retinitis pigmentosa and sperm abnormalities 300864 Cerebral-cerebellar-coloboma syndrome X-linked 309050 Lutheran suppressor X-linked 300010 A-11 gene 300074 X chromosome-controlling ele…	NA	1CG-001|3CG-035|3CG-042|3CG-047|3CG-064|3CG-173|8CG-004
DGC	MIR450A2	7	100	X	q11.1|q28	300345 Microphthalmia isolated with coloboma 1 300471 Cubitus valgus with mental retardation and unusual facies 300484 Orofaciodigital syndrome VIII 300716 Mental retardation X-linked 95 300719 Deafness cataract retinitis pigmentosa and sperm abnormalities 300864 Cerebral-cerebellar-coloboma syndrome X-linked 309050 Lutheran suppressor X-linked 300010 A-11 gene 300074 X chromosome-controlling ele…	NA	1CG-001|3CG-035|3CG-042|3CG-047|3CG-064|3CG-173|8CG-004
DGC	MIR450B	7	100	X	q11.1|q28	300345 Microphthalmia isolated with coloboma 1 300471 Cubitus valgus with mental retardation and unusual facies 300484 Orofaciodigital syndrome VIII 300716 Mental retardation X-linked 95 300719 Deafness cataract retinitis pigmentosa and sperm abnormalities 300864 Cerebral-cerebellar-coloboma syndrome X-linked 309050 Lutheran suppressor X-linked 300010 A-11 gene 300074 X chromosome-controlling ele…	NA	1CG-001|3CG-035|3CG-042|3CG-047|3CG-064|3CG-173|8CG-004
DGC	MIR452	7	100	X	q11.1|q28	300345 Microphthalmia isolated with coloboma 1 300471 Cubitus valgus with mental retardation and unusual facies 300484 Orofaciodigital syndrome VIII 300716 Mental retardation X-linked 95 300719 Deafness cataract retinitis pigmentosa and sperm abnormalities 300864 Cerebral-cerebellar-coloboma syndrome X-linked 309050 Lutheran suppressor X-linked 300010 A-11 gene 300074 X chromosome-controlling ele…	NA	1CG-001|3CG-035|3CG-042|3CG-047|3CG-064|3CG-173|8CG-004
DGC	MIR4536-1	7	100	X	p22.33|p11.1	301780 Arylsulfatase C f form 300345 Microphthalmia isolated with coloboma 1 300471 Cubitus valgus with mental retardation and unusual facies 300484 Orofaciodigital syndrome VIII 300716 Mental retardation X-linked 95 300719 Deafness cataract retinitis pigmentosa and sperm abnormalities 300864 Cerebral-cerebellar-coloboma syndrome X-linked 309050 Lutheran suppressor X-linked 301067 Family with seq…	NA	1CG-001|3CG-035|3CG-042|3CG-047|3CG-064|3CG-173|8CG-004
DGC	MIR4536-2	7	100	X	p22.33|p11.1	301780 Arylsulfatase C f form 300345 Microphthalmia isolated with coloboma 1 300471 Cubitus valgus with mental retardation and unusual facies 300484 Orofaciodigital syndrome VIII 300716 Mental retardation X-linked 95 300719 Deafness cataract retinitis pigmentosa and sperm abnormalities 300864 Cerebral-cerebellar-coloboma syndrome X-linked 309050 Lutheran suppressor X-linked 301067 Family with seq…	NA	1CG-001|3CG-035|3CG-042|3CG-047|3CG-064|3CG-173|8CG-004
DGC	MIR4666B	7	100	X	p22.33|p11.1	301780 Arylsulfatase C f form 300345 Microphthalmia isolated with coloboma 1 300471 Cubitus valgus with mental retardation and unusual facies 300484 Orofaciodigital syndrome VIII 300716 Mental retardation X-linked 95 300719 Deafness cataract retinitis pigmentosa and sperm abnormalities 300864 Cerebral-cerebellar-coloboma syndrome X-linked 309050 Lutheran suppressor X-linked 301067 Family with seq…	NA	1CG-001|3CG-035|3CG-042|3CG-047|3CG-064|3CG-173|8CG-004
DGC	MIR4767	7	100	X	p22.33|p11.1	301780 Arylsulfatase C f form 300345 Microphthalmia isolated with coloboma 1 300471 Cubitus valgus with mental retardation and unusual facies 300484 Orofaciodigital syndrome VIII 300716 Mental retardation X-linked 95 300719 Deafness cataract retinitis pigmentosa and sperm abnormalities 300864 Cerebral-cerebellar-coloboma syndrome X-linked 309050 Lutheran suppressor X-linked 301067 Family with seq…	NA	1CG-001|3CG-035|3CG-042|3CG-047|3CG-064|3CG-173|8CG-004
DGC	MIR4768	7	100	X	p22.33|p11.1	301780 Arylsulfatase C f form 300345 Microphthalmia isolated with coloboma 1 300471 Cubitus valgus with mental retardation and unusual facies 300484 Orofaciodigital syndrome VIII 300716 Mental retardation X-linked 95 300719 Deafness cataract retinitis pigmentosa and sperm abnormalities 300864 Cerebral-cerebellar-coloboma syndrome X-linked 309050 Lutheran suppressor X-linked 301067 Family with seq…	NA	1CG-001|3CG-035|3CG-042|3CG-047|3CG-064|3CG-173|8CG-004
DGC	MIR4769	7	100	X	p22.33|p11.1	301780 Arylsulfatase C f form 300345 Microphthalmia isolated with coloboma 1 300471 Cubitus valgus with mental retardation and unusual facies 300484 Orofaciodigital syndrome VIII 300716 Mental retardation X-linked 95 300719 Deafness cataract retinitis pigmentosa and sperm abnormalities 300864 Cerebral-cerebellar-coloboma syndrome X-linked 309050 Lutheran suppressor X-linked 301067 Family with seq…	NA	1CG-001|3CG-035|3CG-042|3CG-047|3CG-064|3CG-173|8CG-004
DGC	MIR4770	7	100	X	p22.33|p11.1	301780 Arylsulfatase C f form 300345 Microphthalmia isolated with coloboma 1 300471 Cubitus valgus with mental retardation and unusual facies 300484 Orofaciodigital syndrome VIII 300716 Mental retardation X-linked 95 300719 Deafness cataract retinitis pigmentosa and sperm abnormalities 300864 Cerebral-cerebellar-coloboma syndrome X-linked 309050 Lutheran suppressor X-linked 301067 Family with seq…	NA	1CG-001|3CG-035|3CG-042|3CG-047|3CG-064|3CG-173|8CG-004
DGC	MIR500A	7	100	X	p22.33|p11.1	301780 Arylsulfatase C f form 300345 Microphthalmia isolated with coloboma 1 300471 Cubitus valgus with mental retardation and unusual facies 300484 Orofaciodigital syndrome VIII 300716 Mental retardation X-linked 95 300719 Deafness cataract retinitis pigmentosa and sperm abnormalities 300864 Cerebral-cerebellar-coloboma syndrome X-linked 309050 Lutheran suppressor X-linked 301067 Family with seq…	NA	1CG-001|3CG-035|3CG-042|3CG-047|3CG-064|3CG-173|8CG-004
DGC	MIR500B	7	100	X	p22.33|p11.1	301780 Arylsulfatase C f form 300345 Microphthalmia isolated with coloboma 1 300471 Cubitus valgus with mental retardation and unusual facies 300484 Orofaciodigital syndrome VIII 300716 Mental retardation X-linked 95 300719 Deafness cataract retinitis pigmentosa and sperm abnormalities 300864 Cerebral-cerebellar-coloboma syndrome X-linked 309050 Lutheran suppressor X-linked 301067 Family with seq…	NA	1CG-001|3CG-035|3CG-042|3CG-047|3CG-064|3CG-173|8CG-004
DGC	MIR501	7	100	X	p22.33|p11.1	301780 Arylsulfatase C f form 300345 Microphthalmia isolated with coloboma 1 300471 Cubitus valgus with mental retardation and unusual facies 300484 Orofaciodigital syndrome VIII 300716 Mental retardation X-linked 95 300719 Deafness cataract retinitis pigmentosa and sperm abnormalities 300864 Cerebral-cerebellar-coloboma syndrome X-linked 309050 Lutheran suppressor X-linked 301067 Family with seq…	NA	1CG-001|3CG-035|3CG-042|3CG-047|3CG-064|3CG-173|8CG-004
DGC	MIR502	7	100	X	p22.33|p11.1	301780 Arylsulfatase C f form 300345 Microphthalmia isolated with coloboma 1 300471 Cubitus valgus with mental retardation and unusual facies 300484 Orofaciodigital syndrome VIII 300716 Mental retardation X-linked 95 300719 Deafness cataract retinitis pigmentosa and sperm abnormalities 300864 Cerebral-cerebellar-coloboma syndrome X-linked 309050 Lutheran suppressor X-linked 301067 Family with seq…	NA	1CG-001|3CG-035|3CG-042|3CG-047|3CG-064|3CG-173|8CG-004
DGC	MIR503	7	100	X	q11.1|q28	300345 Microphthalmia isolated with coloboma 1 300471 Cubitus valgus with mental retardation and unusual facies 300484 Orofaciodigital syndrome VIII 300716 Mental retardation X-linked 95 300719 Deafness cataract retinitis pigmentosa and sperm abnormalities 300864 Cerebral-cerebellar-coloboma syndrome X-linked 309050 Lutheran suppressor X-linked 300010 A-11 gene 300074 X chromosome-controlling ele…	NA	1CG-001|3CG-035|3CG-042|3CG-047|3CG-064|3CG-173|8CG-004
DGC	MIR503HG	7	100	X	q11.1|q28	300345 Microphthalmia isolated with coloboma 1 300471 Cubitus valgus with mental retardation and unusual facies 300484 Orofaciodigital syndrome VIII 300716 Mental retardation X-linked 95 300719 Deafness cataract retinitis pigmentosa and sperm abnormalities 300864 Cerebral-cerebellar-coloboma syndrome X-linked 309050 Lutheran suppressor X-linked 300010 A-11 gene 300074 X chromosome-controlling ele…	NA	1CG-001|3CG-035|3CG-042|3CG-047|3CG-064|3CG-173|8CG-004
DGC	MIR504	7	100	X	q11.1|q28	300345 Microphthalmia isolated with coloboma 1 300471 Cubitus valgus with mental retardation and unusual facies 300484 Orofaciodigital syndrome VIII 300716 Mental retardation X-linked 95 300719 Deafness cataract retinitis pigmentosa and sperm abnormalities 300864 Cerebral-cerebellar-coloboma syndrome X-linked 309050 Lutheran suppressor X-linked 300010 A-11 gene 300074 X chromosome-controlling ele…	NA	1CG-001|3CG-035|3CG-042|3CG-047|3CG-064|3CG-173|8CG-004
DGC	MIR505	7	100	X	q11.1|q28	300345 Microphthalmia isolated with coloboma 1 300471 Cubitus valgus with mental retardation and unusual facies 300484 Orofaciodigital syndrome VIII 300716 Mental retardation X-linked 95 300719 Deafness cataract retinitis pigmentosa and sperm abnormalities 300864 Cerebral-cerebellar-coloboma syndrome X-linked 309050 Lutheran suppressor X-linked 300010 A-11 gene 300074 X chromosome-controlling ele…	NA	1CG-001|3CG-035|3CG-042|3CG-047|3CG-064|3CG-173|8CG-004
DGC	MIR506	7	100	X	q11.1|q28	300345 Microphthalmia isolated with coloboma 1 300471 Cubitus valgus with mental retardation and unusual facies 300484 Orofaciodigital syndrome VIII 300716 Mental retardation X-linked 95 300719 Deafness cataract retinitis pigmentosa and sperm abnormalities 300864 Cerebral-cerebellar-coloboma syndrome X-linked 309050 Lutheran suppressor X-linked 300010 A-11 gene 300074 X chromosome-controlling ele…	NA	1CG-001|3CG-035|3CG-042|3CG-047|3CG-064|3CG-173|8CG-004
DGC	MIR507	7	100	X	q11.1|q28	300345 Microphthalmia isolated with coloboma 1 300471 Cubitus valgus with mental retardation and unusual facies 300484 Orofaciodigital syndrome VIII 300716 Mental retardation X-linked 95 300719 Deafness cataract retinitis pigmentosa and sperm abnormalities 300864 Cerebral-cerebellar-coloboma syndrome X-linked 309050 Lutheran suppressor X-linked 300010 A-11 gene 300074 X chromosome-controlling ele…	NA	1CG-001|3CG-035|3CG-042|3CG-047|3CG-064|3CG-173|8CG-004
DGC	MIR508	7	100	X	q11.1|q28	300345 Microphthalmia isolated with coloboma 1 300471 Cubitus valgus with mental retardation and unusual facies 300484 Orofaciodigital syndrome VIII 300716 Mental retardation X-linked 95 300719 Deafness cataract retinitis pigmentosa and sperm abnormalities 300864 Cerebral-cerebellar-coloboma syndrome X-linked 309050 Lutheran suppressor X-linked 300010 A-11 gene 300074 X chromosome-controlling ele…	NA	1CG-001|3CG-035|3CG-042|3CG-047|3CG-064|3CG-173|8CG-004
DGC	MIR509-1	7	100	X	q11.1|q28	300345 Microphthalmia isolated with coloboma 1 300471 Cubitus valgus with mental retardation and unusual facies 300484 Orofaciodigital syndrome VIII 300716 Mental retardation X-linked 95 300719 Deafness cataract retinitis pigmentosa and sperm abnormalities 300864 Cerebral-cerebellar-coloboma syndrome X-linked 309050 Lutheran suppressor X-linked 300010 A-11 gene 300074 X chromosome-controlling ele…	NA	1CG-001|3CG-035|3CG-042|3CG-047|3CG-064|3CG-173|8CG-004
DGC	MIR509-2	7	100	X	q11.1|q28	300345 Microphthalmia isolated with coloboma 1 300471 Cubitus valgus with mental retardation and unusual facies 300484 Orofaciodigital syndrome VIII 300716 Mental retardation X-linked 95 300719 Deafness cataract retinitis pigmentosa and sperm abnormalities 300864 Cerebral-cerebellar-coloboma syndrome X-linked 309050 Lutheran suppressor X-linked 300010 A-11 gene 300074 X chromosome-controlling ele…	NA	1CG-001|3CG-035|3CG-042|3CG-047|3CG-064|3CG-173|8CG-004
DGC	MIR509-3	7	100	X	q11.1|q28	300345 Microphthalmia isolated with coloboma 1 300471 Cubitus valgus with mental retardation and unusual facies 300484 Orofaciodigital syndrome VIII 300716 Mental retardation X-linked 95 300719 Deafness cataract retinitis pigmentosa and sperm abnormalities 300864 Cerebral-cerebellar-coloboma syndrome X-linked 309050 Lutheran suppressor X-linked 300010 A-11 gene 300074 X chromosome-controlling ele…	NA	1CG-001|3CG-035|3CG-042|3CG-047|3CG-064|3CG-173|8CG-004
DGC	MIR510	7	100	X	q11.1|q28	300345 Microphthalmia isolated with coloboma 1 300471 Cubitus valgus with mental retardation and unusual facies 300484 Orofaciodigital syndrome VIII 300716 Mental retardation X-linked 95 300719 Deafness cataract retinitis pigmentosa and sperm abnormalities 300864 Cerebral-cerebellar-coloboma syndrome X-linked 309050 Lutheran suppressor X-linked 300010 A-11 gene 300074 X chromosome-controlling ele…	NA	1CG-001|3CG-035|3CG-042|3CG-047|3CG-064|3CG-173|8CG-004
DGC	MIR513A1	7	100	X	q11.1|q28	300345 Microphthalmia isolated with coloboma 1 300471 Cubitus valgus with mental retardation and unusual facies 300484 Orofaciodigital syndrome VIII 300716 Mental retardation X-linked 95 300719 Deafness cataract retinitis pigmentosa and sperm abnormalities 300864 Cerebral-cerebellar-coloboma syndrome X-linked 309050 Lutheran suppressor X-linked 300010 A-11 gene 300074 X chromosome-controlling ele…	NA	1CG-001|3CG-035|3CG-042|3CG-047|3CG-064|3CG-173|8CG-004
DGC	MIR513A2	7	100	X	q11.1|q28	300345 Microphthalmia isolated with coloboma 1 300471 Cubitus valgus with mental retardation and unusual facies 300484 Orofaciodigital syndrome VIII 300716 Mental retardation X-linked 95 300719 Deafness cataract retinitis pigmentosa and sperm abnormalities 300864 Cerebral-cerebellar-coloboma syndrome X-linked 309050 Lutheran suppressor X-linked 300010 A-11 gene 300074 X chromosome-controlling ele…	NA	1CG-001|3CG-035|3CG-042|3CG-047|3CG-064|3CG-173|8CG-004
DGC	MIR513B	7	100	X	q11.1|q28	300345 Microphthalmia isolated with coloboma 1 300471 Cubitus valgus with mental retardation and unusual facies 300484 Orofaciodigital syndrome VIII 300716 Mental retardation X-linked 95 300719 Deafness cataract retinitis pigmentosa and sperm abnormalities 300864 Cerebral-cerebellar-coloboma syndrome X-linked 309050 Lutheran suppressor X-linked 300010 A-11 gene 300074 X chromosome-controlling ele…	NA	1CG-001|3CG-035|3CG-042|3CG-047|3CG-064|3CG-173|8CG-004
DGC	MIR513C	7	100	X	q11.1|q28	300345 Microphthalmia isolated with coloboma 1 300471 Cubitus valgus with mental retardation and unusual facies 300484 Orofaciodigital syndrome VIII 300716 Mental retardation X-linked 95 300719 Deafness cataract retinitis pigmentosa and sperm abnormalities 300864 Cerebral-cerebellar-coloboma syndrome X-linked 309050 Lutheran suppressor X-linked 300010 A-11 gene 300074 X chromosome-controlling ele…	NA	1CG-001|3CG-035|3CG-042|3CG-047|3CG-064|3CG-173|8CG-004
DGC	MIR514A1	7	100	X	q11.1|q28	300345 Microphthalmia isolated with coloboma 1 300471 Cubitus valgus with mental retardation and unusual facies 300484 Orofaciodigital syndrome VIII 300716 Mental retardation X-linked 95 300719 Deafness cataract retinitis pigmentosa and sperm abnormalities 300864 Cerebral-cerebellar-coloboma syndrome X-linked 309050 Lutheran suppressor X-linked 300010 A-11 gene 300074 X chromosome-controlling ele…	NA	1CG-001|3CG-035|3CG-042|3CG-047|3CG-064|3CG-173|8CG-004
DGC	MIR514A2	7	100	X	q11.1|q28	300345 Microphthalmia isolated with coloboma 1 300471 Cubitus valgus with mental retardation and unusual facies 300484 Orofaciodigital syndrome VIII 300716 Mental retardation X-linked 95 300719 Deafness cataract retinitis pigmentosa and sperm abnormalities 300864 Cerebral-cerebellar-coloboma syndrome X-linked 309050 Lutheran suppressor X-linked 300010 A-11 gene 300074 X chromosome-controlling ele…	NA	1CG-001|3CG-035|3CG-042|3CG-047|3CG-064|3CG-173|8CG-004
DGC	MIR514A3	7	100	X	q11.1|q28	300345 Microphthalmia isolated with coloboma 1 300471 Cubitus valgus with mental retardation and unusual facies 300484 Orofaciodigital syndrome VIII 300716 Mental retardation X-linked 95 300719 Deafness cataract retinitis pigmentosa and sperm abnormalities 300864 Cerebral-cerebellar-coloboma syndrome X-linked 309050 Lutheran suppressor X-linked 300010 A-11 gene 300074 X chromosome-controlling ele…	NA	1CG-001|3CG-035|3CG-042|3CG-047|3CG-064|3CG-173|8CG-004
DGC	MIR514B	7	100	X	q11.1|q28	300345 Microphthalmia isolated with coloboma 1 300471 Cubitus valgus with mental retardation and unusual facies 300484 Orofaciodigital syndrome VIII 300716 Mental retardation X-linked 95 300719 Deafness cataract retinitis pigmentosa and sperm abnormalities 300864 Cerebral-cerebellar-coloboma syndrome X-linked 309050 Lutheran suppressor X-linked 300010 A-11 gene 300074 X chromosome-controlling ele…	NA	1CG-001|3CG-035|3CG-042|3CG-047|3CG-064|3CG-173|8CG-004
DGC	MIR532	7	100	X	p22.33|p11.1	301780 Arylsulfatase C f form 300345 Microphthalmia isolated with coloboma 1 300471 Cubitus valgus with mental retardation and unusual facies 300484 Orofaciodigital syndrome VIII 300716 Mental retardation X-linked 95 300719 Deafness cataract retinitis pigmentosa and sperm abnormalities 300864 Cerebral-cerebellar-coloboma syndrome X-linked 309050 Lutheran suppressor X-linked 301067 Family with seq…	NA	1CG-001|3CG-035|3CG-042|3CG-047|3CG-064|3CG-173|8CG-004
DGC	MIR542	7	100	X	q11.1|q28	300345 Microphthalmia isolated with coloboma 1 300471 Cubitus valgus with mental retardation and unusual facies 300484 Orofaciodigital syndrome VIII 300716 Mental retardation X-linked 95 300719 Deafness cataract retinitis pigmentosa and sperm abnormalities 300864 Cerebral-cerebellar-coloboma syndrome X-linked 309050 Lutheran suppressor X-linked 300010 A-11 gene 300074 X chromosome-controlling ele…	NA	1CG-001|3CG-035|3CG-042|3CG-047|3CG-064|3CG-173|8CG-004
DGC	MIR545	7	100	X	q11.1|q28	300345 Microphthalmia isolated with coloboma 1 300471 Cubitus valgus with mental retardation and unusual facies 300484 Orofaciodigital syndrome VIII 300716 Mental retardation X-linked 95 300719 Deafness cataract retinitis pigmentosa and sperm abnormalities 300864 Cerebral-cerebellar-coloboma syndrome X-linked 309050 Lutheran suppressor X-linked 300010 A-11 gene 300074 X chromosome-controlling ele…	NA	1CG-001|3CG-035|3CG-042|3CG-047|3CG-064|3CG-173|8CG-004
DGC	MIR548AJ2	7	100	X	p22.33|p11.1	301780 Arylsulfatase C f form 300345 Microphthalmia isolated with coloboma 1 300471 Cubitus valgus with mental retardation and unusual facies 300484 Orofaciodigital syndrome VIII 300716 Mental retardation X-linked 95 300719 Deafness cataract retinitis pigmentosa and sperm abnormalities 300864 Cerebral-cerebellar-coloboma syndrome X-linked 309050 Lutheran suppressor X-linked 301067 Family with seq…	NA	1CG-001|3CG-035|3CG-042|3CG-047|3CG-064|3CG-173|8CG-004
DGC	MIR548AM	7	100	X	p22.33|p11.1	301780 Arylsulfatase C f form 300345 Microphthalmia isolated with coloboma 1 300471 Cubitus valgus with mental retardation and unusual facies 300484 Orofaciodigital syndrome VIII 300716 Mental retardation X-linked 95 300719 Deafness cataract retinitis pigmentosa and sperm abnormalities 300864 Cerebral-cerebellar-coloboma syndrome X-linked 309050 Lutheran suppressor X-linked 301067 Family with seq…	NA	1CG-001|3CG-035|3CG-042|3CG-047|3CG-064|3CG-173|8CG-004
DGC	MIR548AN	7	100	X	q11.1|q28	300345 Microphthalmia isolated with coloboma 1 300471 Cubitus valgus with mental retardation and unusual facies 300484 Orofaciodigital syndrome VIII 300716 Mental retardation X-linked 95 300719 Deafness cataract retinitis pigmentosa and sperm abnormalities 300864 Cerebral-cerebellar-coloboma syndrome X-linked 309050 Lutheran suppressor X-linked 300010 A-11 gene 300074 X chromosome-controlling ele…	NA	1CG-001|3CG-035|3CG-042|3CG-047|3CG-064|3CG-173|8CG-004
DGC	MIR548AX	7	100	X	p22.33|p11.1	301780 Arylsulfatase C f form 300345 Microphthalmia isolated with coloboma 1 300471 Cubitus valgus with mental retardation and unusual facies 300484 Orofaciodigital syndrome VIII 300716 Mental retardation X-linked 95 300719 Deafness cataract retinitis pigmentosa and sperm abnormalities 300864 Cerebral-cerebellar-coloboma syndrome X-linked 309050 Lutheran suppressor X-linked 301067 Family with seq…	NA	1CG-001|3CG-035|3CG-042|3CG-047|3CG-064|3CG-173|8CG-004
DGC	MIR548F5	7	100	X	p22.33|p11.1	301780 Arylsulfatase C f form 300345 Microphthalmia isolated with coloboma 1 300471 Cubitus valgus with mental retardation and unusual facies 300484 Orofaciodigital syndrome VIII 300716 Mental retardation X-linked 95 300719 Deafness cataract retinitis pigmentosa and sperm abnormalities 300864 Cerebral-cerebellar-coloboma syndrome X-linked 309050 Lutheran suppressor X-linked 301067 Family with seq…	NA	1CG-001|3CG-035|3CG-042|3CG-047|3CG-064|3CG-173|8CG-004
DGC	MIR548I4	7	100	X	q11.1|q28	300345 Microphthalmia isolated with coloboma 1 300471 Cubitus valgus with mental retardation and unusual facies 300484 Orofaciodigital syndrome VIII 300716 Mental retardation X-linked 95 300719 Deafness cataract retinitis pigmentosa and sperm abnormalities 300864 Cerebral-cerebellar-coloboma syndrome X-linked 309050 Lutheran suppressor X-linked 300010 A-11 gene 300074 X chromosome-controlling ele…	NA	1CG-001|3CG-035|3CG-042|3CG-047|3CG-064|3CG-173|8CG-004
DGC	MIR548M	7	100	X	q11.1|q28	300345 Microphthalmia isolated with coloboma 1 300471 Cubitus valgus with mental retardation and unusual facies 300484 Orofaciodigital syndrome VIII 300716 Mental retardation X-linked 95 300719 Deafness cataract retinitis pigmentosa and sperm abnormalities 300864 Cerebral-cerebellar-coloboma syndrome X-linked 309050 Lutheran suppressor X-linked 300010 A-11 gene 300074 X chromosome-controlling ele…	NA	1CG-001|3CG-035|3CG-042|3CG-047|3CG-064|3CG-173|8CG-004
DGC	MIR6086	7	100	X	p22.33|p11.1	301780 Arylsulfatase C f form 300345 Microphthalmia isolated with coloboma 1 300471 Cubitus valgus with mental retardation and unusual facies 300484 Orofaciodigital syndrome VIII 300716 Mental retardation X-linked 95 300719 Deafness cataract retinitis pigmentosa and sperm abnormalities 300864 Cerebral-cerebellar-coloboma syndrome X-linked 309050 Lutheran suppressor X-linked 301067 Family with seq…	NA	1CG-001|3CG-035|3CG-042|3CG-047|3CG-064|3CG-173|8CG-004
DGC	MIR6134	7	100	X	p22.33|p11.1	301780 Arylsulfatase C f form 300345 Microphthalmia isolated with coloboma 1 300471 Cubitus valgus with mental retardation and unusual facies 300484 Orofaciodigital syndrome VIII 300716 Mental retardation X-linked 95 300719 Deafness cataract retinitis pigmentosa and sperm abnormalities 300864 Cerebral-cerebellar-coloboma syndrome X-linked 309050 Lutheran suppressor X-linked 301067 Family with seq…	NA	1CG-001|3CG-035|3CG-042|3CG-047|3CG-064|3CG-173|8CG-004
DGC	MIR651	7	100	X	p22.33|p11.1	301780 Arylsulfatase C f form 300345 Microphthalmia isolated with coloboma 1 300471 Cubitus valgus with mental retardation and unusual facies 300484 Orofaciodigital syndrome VIII 300716 Mental retardation X-linked 95 300719 Deafness cataract retinitis pigmentosa and sperm abnormalities 300864 Cerebral-cerebellar-coloboma syndrome X-linked 309050 Lutheran suppressor X-linked 301067 Family with seq…	NA	1CG-001|3CG-035|3CG-042|3CG-047|3CG-064|3CG-173|8CG-004
DGC	MIR652	7	100	X	q11.1|q28	300345 Microphthalmia isolated with coloboma 1 300471 Cubitus valgus with mental retardation and unusual facies 300484 Orofaciodigital syndrome VIII 300716 Mental retardation X-linked 95 300719 Deafness cataract retinitis pigmentosa and sperm abnormalities 300864 Cerebral-cerebellar-coloboma syndrome X-linked 309050 Lutheran suppressor X-linked 300010 A-11 gene 300074 X chromosome-controlling ele…	NA	1CG-001|3CG-035|3CG-042|3CG-047|3CG-064|3CG-173|8CG-004
DGC	MIR660	7	100	X	p22.33|p11.1	301780 Arylsulfatase C f form 300345 Microphthalmia isolated with coloboma 1 300471 Cubitus valgus with mental retardation and unusual facies 300484 Orofaciodigital syndrome VIII 300716 Mental retardation X-linked 95 300719 Deafness cataract retinitis pigmentosa and sperm abnormalities 300864 Cerebral-cerebellar-coloboma syndrome X-linked 309050 Lutheran suppressor X-linked 301067 Family with seq…	NA	1CG-001|3CG-035|3CG-042|3CG-047|3CG-064|3CG-173|8CG-004
DGC	MIR664B	7	100	X	q11.1|q28	300345 Microphthalmia isolated with coloboma 1 300471 Cubitus valgus with mental retardation and unusual facies 300484 Orofaciodigital syndrome VIII 300716 Mental retardation X-linked 95 300719 Deafness cataract retinitis pigmentosa and sperm abnormalities 300864 Cerebral-cerebellar-coloboma syndrome X-linked 309050 Lutheran suppressor X-linked 300010 A-11 gene 300074 X chromosome-controlling ele…	NA	1CG-001|3CG-035|3CG-042|3CG-047|3CG-064|3CG-173|8CG-004
DGC	MIR676	7	100	X	q11.1|q28	300345 Microphthalmia isolated with coloboma 1 300471 Cubitus valgus with mental retardation and unusual facies 300484 Orofaciodigital syndrome VIII 300716 Mental retardation X-linked 95 300719 Deafness cataract retinitis pigmentosa and sperm abnormalities 300864 Cerebral-cerebellar-coloboma syndrome X-linked 309050 Lutheran suppressor X-linked 300010 A-11 gene 300074 X chromosome-controlling ele…	NA	1CG-001|3CG-035|3CG-042|3CG-047|3CG-064|3CG-173|8CG-004
DGC	MIR6857	7	100	X	p22.33|p11.1	301780 Arylsulfatase C f form 300345 Microphthalmia isolated with coloboma 1 300471 Cubitus valgus with mental retardation and unusual facies 300484 Orofaciodigital syndrome VIII 300716 Mental retardation X-linked 95 300719 Deafness cataract retinitis pigmentosa and sperm abnormalities 300864 Cerebral-cerebellar-coloboma syndrome X-linked 309050 Lutheran suppressor X-linked 301067 Family with seq…	NA	1CG-001|3CG-035|3CG-042|3CG-047|3CG-064|3CG-173|8CG-004
DGC	MIR6858	7	100	X	q11.1|q28	300345 Microphthalmia isolated with coloboma 1 300471 Cubitus valgus with mental retardation and unusual facies 300484 Orofaciodigital syndrome VIII 300716 Mental retardation X-linked 95 300719 Deafness cataract retinitis pigmentosa and sperm abnormalities 300864 Cerebral-cerebellar-coloboma syndrome X-linked 309050 Lutheran suppressor X-linked 300010 A-11 gene 300074 X chromosome-controlling ele…	NA	1CG-001|3CG-035|3CG-042|3CG-047|3CG-064|3CG-173|8CG-004
DGC	MIR6894	7	100	X	p22.33|p11.1	301780 Arylsulfatase C f form 300345 Microphthalmia isolated with coloboma 1 300471 Cubitus valgus with mental retardation and unusual facies 300484 Orofaciodigital syndrome VIII 300716 Mental retardation X-linked 95 300719 Deafness cataract retinitis pigmentosa and sperm abnormalities 300864 Cerebral-cerebellar-coloboma syndrome X-linked 309050 Lutheran suppressor X-linked 301067 Family with seq…	NA	1CG-001|3CG-035|3CG-042|3CG-047|3CG-064|3CG-173|8CG-004
DGC	MIR6895	7	100	X	p22.33|p11.1	301780 Arylsulfatase C f form 300345 Microphthalmia isolated with coloboma 1 300471 Cubitus valgus with mental retardation and unusual facies 300484 Orofaciodigital syndrome VIII 300716 Mental retardation X-linked 95 300719 Deafness cataract retinitis pigmentosa and sperm abnormalities 300864 Cerebral-cerebellar-coloboma syndrome X-linked 309050 Lutheran suppressor X-linked 301067 Family with seq…	NA	1CG-001|3CG-035|3CG-042|3CG-047|3CG-064|3CG-173|8CG-004
DGC	MIR718	7	100	X	q11.1|q28	300345 Microphthalmia isolated with coloboma 1 300471 Cubitus valgus with mental retardation and unusual facies 300484 Orofaciodigital syndrome VIII 300716 Mental retardation X-linked 95 300719 Deafness cataract retinitis pigmentosa and sperm abnormalities 300864 Cerebral-cerebellar-coloboma syndrome X-linked 309050 Lutheran suppressor X-linked 300010 A-11 gene 300074 X chromosome-controlling ele…	NA	1CG-001|3CG-035|3CG-042|3CG-047|3CG-064|3CG-173|8CG-004
DGC	MIR764	7	100	X	q11.1|q28	300345 Microphthalmia isolated with coloboma 1 300471 Cubitus valgus with mental retardation and unusual facies 300484 Orofaciodigital syndrome VIII 300716 Mental retardation X-linked 95 300719 Deafness cataract retinitis pigmentosa and sperm abnormalities 300864 Cerebral-cerebellar-coloboma syndrome X-linked 309050 Lutheran suppressor X-linked 300010 A-11 gene 300074 X chromosome-controlling ele…	NA	1CG-001|3CG-035|3CG-042|3CG-047|3CG-064|3CG-173|8CG-004
DGC	MIR766	7	100	X	q11.1|q28	300345 Microphthalmia isolated with coloboma 1 300471 Cubitus valgus with mental retardation and unusual facies 300484 Orofaciodigital syndrome VIII 300716 Mental retardation X-linked 95 300719 Deafness cataract retinitis pigmentosa and sperm abnormalities 300864 Cerebral-cerebellar-coloboma syndrome X-linked 309050 Lutheran suppressor X-linked 300010 A-11 gene 300074 X chromosome-controlling ele…	NA	1CG-001|3CG-035|3CG-042|3CG-047|3CG-064|3CG-173|8CG-004
DGC	MIR767	7	100	X	q11.1|q28	300345 Microphthalmia isolated with coloboma 1 300471 Cubitus valgus with mental retardation and unusual facies 300484 Orofaciodigital syndrome VIII 300716 Mental retardation X-linked 95 300719 Deafness cataract retinitis pigmentosa and sperm abnormalities 300864 Cerebral-cerebellar-coloboma syndrome X-linked 309050 Lutheran suppressor X-linked 300010 A-11 gene 300074 X chromosome-controlling ele…	NA	1CG-001|3CG-035|3CG-042|3CG-047|3CG-064|3CG-173|8CG-004
DGC	MIR8088	7	100	X	p22.33|p11.1	301780 Arylsulfatase C f form 300345 Microphthalmia isolated with coloboma 1 300471 Cubitus valgus with mental retardation and unusual facies 300484 Orofaciodigital syndrome VIII 300716 Mental retardation X-linked 95 300719 Deafness cataract retinitis pigmentosa and sperm abnormalities 300864 Cerebral-cerebellar-coloboma syndrome X-linked 309050 Lutheran suppressor X-linked 301067 Family with seq…	NA	1CG-001|3CG-035|3CG-042|3CG-047|3CG-064|3CG-173|8CG-004
DGC	MIR888	7	100	X	q11.1|q28	300345 Microphthalmia isolated with coloboma 1 300471 Cubitus valgus with mental retardation and unusual facies 300484 Orofaciodigital syndrome VIII 300716 Mental retardation X-linked 95 300719 Deafness cataract retinitis pigmentosa and sperm abnormalities 300864 Cerebral-cerebellar-coloboma syndrome X-linked 309050 Lutheran suppressor X-linked 300010 A-11 gene 300074 X chromosome-controlling ele…	NA	1CG-001|3CG-035|3CG-042|3CG-047|3CG-064|3CG-173|8CG-004
DGC	MIR890	7	100	X	q11.1|q28	300345 Microphthalmia isolated with coloboma 1 300471 Cubitus valgus with mental retardation and unusual facies 300484 Orofaciodigital syndrome VIII 300716 Mental retardation X-linked 95 300719 Deafness cataract retinitis pigmentosa and sperm abnormalities 300864 Cerebral-cerebellar-coloboma syndrome X-linked 309050 Lutheran suppressor X-linked 300010 A-11 gene 300074 X chromosome-controlling ele…	NA	1CG-001|3CG-035|3CG-042|3CG-047|3CG-064|3CG-173|8CG-004
DGC	MIR891A	7	100	X	q11.1|q28	300345 Microphthalmia isolated with coloboma 1 300471 Cubitus valgus with mental retardation and unusual facies 300484 Orofaciodigital syndrome VIII 300716 Mental retardation X-linked 95 300719 Deafness cataract retinitis pigmentosa and sperm abnormalities 300864 Cerebral-cerebellar-coloboma syndrome X-linked 309050 Lutheran suppressor X-linked 300010 A-11 gene 300074 X chromosome-controlling ele…	NA	1CG-001|3CG-035|3CG-042|3CG-047|3CG-064|3CG-173|8CG-004
DGC	MIR891B	7	100	X	q11.1|q28	300345 Microphthalmia isolated with coloboma 1 300471 Cubitus valgus with mental retardation and unusual facies 300484 Orofaciodigital syndrome VIII 300716 Mental retardation X-linked 95 300719 Deafness cataract retinitis pigmentosa and sperm abnormalities 300864 Cerebral-cerebellar-coloboma syndrome X-linked 309050 Lutheran suppressor X-linked 300010 A-11 gene 300074 X chromosome-controlling ele…	NA	1CG-001|3CG-035|3CG-042|3CG-047|3CG-064|3CG-173|8CG-004
DGC	MIR892A	7	100	X	q11.1|q28	300345 Microphthalmia isolated with coloboma 1 300471 Cubitus valgus with mental retardation and unusual facies 300484 Orofaciodigital syndrome VIII 300716 Mental retardation X-linked 95 300719 Deafness cataract retinitis pigmentosa and sperm abnormalities 300864 Cerebral-cerebellar-coloboma syndrome X-linked 309050 Lutheran suppressor X-linked 300010 A-11 gene 300074 X chromosome-controlling ele…	NA	1CG-001|3CG-035|3CG-042|3CG-047|3CG-064|3CG-173|8CG-004
DGC	MIR892B	7	100	X	q11.1|q28	300345 Microphthalmia isolated with coloboma 1 300471 Cubitus valgus with mental retardation and unusual facies 300484 Orofaciodigital syndrome VIII 300716 Mental retardation X-linked 95 300719 Deafness cataract retinitis pigmentosa and sperm abnormalities 300864 Cerebral-cerebellar-coloboma syndrome X-linked 309050 Lutheran suppressor X-linked 300010 A-11 gene 300074 X chromosome-controlling ele…	NA	1CG-001|3CG-035|3CG-042|3CG-047|3CG-064|3CG-173|8CG-004
DGC	MIR892C	7	100	X	q11.1|q28	300345 Microphthalmia isolated with coloboma 1 300471 Cubitus valgus with mental retardation and unusual facies 300484 Orofaciodigital syndrome VIII 300716 Mental retardation X-linked 95 300719 Deafness cataract retinitis pigmentosa and sperm abnormalities 300864 Cerebral-cerebellar-coloboma syndrome X-linked 309050 Lutheran suppressor X-linked 300010 A-11 gene 300074 X chromosome-controlling ele…	NA	1CG-001|3CG-035|3CG-042|3CG-047|3CG-064|3CG-173|8CG-004
DGC	MIR92A2	7	100	X	q11.1|q28	300345 Microphthalmia isolated with coloboma 1 300471 Cubitus valgus with mental retardation and unusual facies 300484 Orofaciodigital syndrome VIII 300716 Mental retardation X-linked 95 300719 Deafness cataract retinitis pigmentosa and sperm abnormalities 300864 Cerebral-cerebellar-coloboma syndrome X-linked 309050 Lutheran suppressor X-linked 300010 A-11 gene 300074 X chromosome-controlling ele…	NA	1CG-001|3CG-035|3CG-042|3CG-047|3CG-064|3CG-173|8CG-004
DGC	MIR934	7	100	X	q11.1|q28	300345 Microphthalmia isolated with coloboma 1 300471 Cubitus valgus with mental retardation and unusual facies 300484 Orofaciodigital syndrome VIII 300716 Mental retardation X-linked 95 300719 Deafness cataract retinitis pigmentosa and sperm abnormalities 300864 Cerebral-cerebellar-coloboma syndrome X-linked 309050 Lutheran suppressor X-linked 300010 A-11 gene 300074 X chromosome-controlling ele…	NA	1CG-001|3CG-035|3CG-042|3CG-047|3CG-064|3CG-173|8CG-004
DGC	MIR98	7	100	X	p22.33|p11.1	301780 Arylsulfatase C f form 300345 Microphthalmia isolated with coloboma 1 300471 Cubitus valgus with mental retardation and unusual facies 300484 Orofaciodigital syndrome VIII 300716 Mental retardation X-linked 95 300719 Deafness cataract retinitis pigmentosa and sperm abnormalities 300864 Cerebral-cerebellar-coloboma syndrome X-linked 309050 Lutheran suppressor X-linked 301067 Family with seq…	NA	1CG-001|3CG-035|3CG-042|3CG-047|3CG-064|3CG-173|8CG-004
DGC	MIRLET7F2	7	100	X	p22.33|p11.1	301780 Arylsulfatase C f form 300345 Microphthalmia isolated with coloboma 1 300471 Cubitus valgus with mental retardation and unusual facies 300484 Orofaciodigital syndrome VIII 300716 Mental retardation X-linked 95 300719 Deafness cataract retinitis pigmentosa and sperm abnormalities 300864 Cerebral-cerebellar-coloboma syndrome X-linked 309050 Lutheran suppressor X-linked 301067 Family with seq…	NA	1CG-001|3CG-035|3CG-042|3CG-047|3CG-064|3CG-173|8CG-004
DGC	MMGT1	7	100	X	q11.1|q28	300345 Microphthalmia isolated with coloboma 1 300471 Cubitus valgus with mental retardation and unusual facies 300484 Orofaciodigital syndrome VIII 300716 Mental retardation X-linked 95 300719 Deafness cataract retinitis pigmentosa and sperm abnormalities 300864 Cerebral-cerebellar-coloboma syndrome X-linked 309050 Lutheran suppressor X-linked 300010 A-11 gene 300074 X chromosome-controlling ele…	MMGT1|0.249616164|31.54%	1CG-001|3CG-035|3CG-042|3CG-047|3CG-064|3CG-173|8CG-004
DGC	MORC4	7	100	X	q11.1|q28	300345 Microphthalmia isolated with coloboma 1 300471 Cubitus valgus with mental retardation and unusual facies 300484 Orofaciodigital syndrome VIII 300716 Mental retardation X-linked 95 300719 Deafness cataract retinitis pigmentosa and sperm abnormalities 300864 Cerebral-cerebellar-coloboma syndrome X-linked 309050 Lutheran suppressor X-linked 300010 A-11 gene 300074 X chromosome-controlling ele…	MORC4|0.183658843|38.58%	1CG-001|3CG-035|3CG-042|3CG-047|3CG-064|3CG-173|8CG-004
DGC	MORF4L2	7	100	X	q11.1|q28	300345 Microphthalmia isolated with coloboma 1 300471 Cubitus valgus with mental retardation and unusual facies 300484 Orofaciodigital syndrome VIII 300716 Mental retardation X-linked 95 300719 Deafness cataract retinitis pigmentosa and sperm abnormalities 300864 Cerebral-cerebellar-coloboma syndrome X-linked 309050 Lutheran suppressor X-linked 300010 A-11 gene 300074 X chromosome-controlling ele…	MORF4L2|0.128661435|46.08%	1CG-001|3CG-035|3CG-042|3CG-047|3CG-064|3CG-173|8CG-004
DGC	MORF4L2-AS1	7	100	X	q11.1|q28	300345 Microphthalmia isolated with coloboma 1 300471 Cubitus valgus with mental retardation and unusual facies 300484 Orofaciodigital syndrome VIII 300716 Mental retardation X-linked 95 300719 Deafness cataract retinitis pigmentosa and sperm abnormalities 300864 Cerebral-cerebellar-coloboma syndrome X-linked 309050 Lutheran suppressor X-linked 300010 A-11 gene 300074 X chromosome-controlling ele…	NA	1CG-001|3CG-035|3CG-042|3CG-047|3CG-064|3CG-173|8CG-004
DGC	MOSPD1	7	100	X	q11.1|q28	300345 Microphthalmia isolated with coloboma 1 300471 Cubitus valgus with mental retardation and unusual facies 300484 Orofaciodigital syndrome VIII 300716 Mental retardation X-linked 95 300719 Deafness cataract retinitis pigmentosa and sperm abnormalities 300864 Cerebral-cerebellar-coloboma syndrome X-linked 309050 Lutheran suppressor X-linked 300010 A-11 gene 300074 X chromosome-controlling ele…	MOSPD1|0.5435802|14.05%	1CG-001|3CG-035|3CG-042|3CG-047|3CG-064|3CG-173|8CG-004
DGC	MOSPD2	7	100	X	p22.33|p11.1	301780 Arylsulfatase C f form 300345 Microphthalmia isolated with coloboma 1 300471 Cubitus valgus with mental retardation and unusual facies 300484 Orofaciodigital syndrome VIII 300716 Mental retardation X-linked 95 300719 Deafness cataract retinitis pigmentosa and sperm abnormalities 300864 Cerebral-cerebellar-coloboma syndrome X-linked 309050 Lutheran suppressor X-linked 301067 Family with seq…	MOSPD2|0.14722296|43.43%	1CG-001|3CG-035|3CG-042|3CG-047|3CG-064|3CG-173|8CG-004
DGC	MPC1L	7	100	X	p22.33|p11.1	301780 Arylsulfatase C f form 300345 Microphthalmia isolated with coloboma 1 300471 Cubitus valgus with mental retardation and unusual facies 300484 Orofaciodigital syndrome VIII 300716 Mental retardation X-linked 95 300719 Deafness cataract retinitis pigmentosa and sperm abnormalities 300864 Cerebral-cerebellar-coloboma syndrome X-linked 309050 Lutheran suppressor X-linked 301067 Family with seq…	NA	1CG-001|3CG-035|3CG-042|3CG-047|3CG-064|3CG-173|8CG-004
DGC	MPP1	7	100	X	q11.1|q28	300345 Microphthalmia isolated with coloboma 1 300471 Cubitus valgus with mental retardation and unusual facies 300484 Orofaciodigital syndrome VIII 300716 Mental retardation X-linked 95 300719 Deafness cataract retinitis pigmentosa and sperm abnormalities 300864 Cerebral-cerebellar-coloboma syndrome X-linked 309050 Lutheran suppressor X-linked 300010 A-11 gene 300074 X chromosome-controlling ele…	MPP1|0.138357743|44.64%	1CG-001|3CG-035|3CG-042|3CG-047|3CG-064|3CG-173|8CG-004
DGC	MSL3	7	100	X	p22.33|p11.1	301780 Arylsulfatase C f form 300345 Microphthalmia isolated with coloboma 1 300471 Cubitus valgus with mental retardation and unusual facies 300484 Orofaciodigital syndrome VIII 300716 Mental retardation X-linked 95 300719 Deafness cataract retinitis pigmentosa and sperm abnormalities 300864 Cerebral-cerebellar-coloboma syndrome X-linked 309050 Lutheran suppressor X-linked 301067 Family with seq…	MSL3|0.145061455|43.72%	1CG-001|3CG-035|3CG-042|3CG-047|3CG-064|3CG-173|8CG-004
DGC	MSN	7	100	X	q11.1|q28	300345 Microphthalmia isolated with coloboma 1 300471 Cubitus valgus with mental retardation and unusual facies 300484 Orofaciodigital syndrome VIII 300716 Mental retardation X-linked 95 300719 Deafness cataract retinitis pigmentosa and sperm abnormalities 300864 Cerebral-cerebellar-coloboma syndrome X-linked 309050 Lutheran suppressor X-linked 300010 A-11 gene 300074 X chromosome-controlling ele…	MSN|0.897456851|3.49%	1CG-001|3CG-035|3CG-042|3CG-047|3CG-064|3CG-173|8CG-004
DGC	MTCP1	7	100	X	q11.1|q28	300345 Microphthalmia isolated with coloboma 1 300471 Cubitus valgus with mental retardation and unusual facies 300484 Orofaciodigital syndrome VIII 300716 Mental retardation X-linked 95 300719 Deafness cataract retinitis pigmentosa and sperm abnormalities 300864 Cerebral-cerebellar-coloboma syndrome X-linked 309050 Lutheran suppressor X-linked 300010 A-11 gene 300074 X chromosome-controlling ele…	MTCP1|0.487086684|16.45%	1CG-001|3CG-035|3CG-042|3CG-047|3CG-064|3CG-173|8CG-004
DGC	MTM1	7	100	X	q11.1|q28	300345 Microphthalmia isolated with coloboma 1 300471 Cubitus valgus with mental retardation and unusual facies 300484 Orofaciodigital syndrome VIII 300716 Mental retardation X-linked 95 300719 Deafness cataract retinitis pigmentosa and sperm abnormalities 300864 Cerebral-cerebellar-coloboma syndrome X-linked 309050 Lutheran suppressor X-linked 300010 A-11 gene 300074 X chromosome-controlling ele…	MTM1|0.580626717|12.54%	1CG-001|3CG-035|3CG-042|3CG-047|3CG-064|3CG-173|8CG-004
DGC	MTMR1	7	100	X	q11.1|q28	300345 Microphthalmia isolated with coloboma 1 300471 Cubitus valgus with mental retardation and unusual facies 300484 Orofaciodigital syndrome VIII 300716 Mental retardation X-linked 95 300719 Deafness cataract retinitis pigmentosa and sperm abnormalities 300864 Cerebral-cerebellar-coloboma syndrome X-linked 309050 Lutheran suppressor X-linked 300010 A-11 gene 300074 X chromosome-controlling ele…	MTMR1|0.251383306|31.42%	1CG-001|3CG-035|3CG-042|3CG-047|3CG-064|3CG-173|8CG-004
DGC	MTMR8	7	100	X	q11.1|q28	300345 Microphthalmia isolated with coloboma 1 300471 Cubitus valgus with mental retardation and unusual facies 300484 Orofaciodigital syndrome VIII 300716 Mental retardation X-linked 95 300719 Deafness cataract retinitis pigmentosa and sperm abnormalities 300864 Cerebral-cerebellar-coloboma syndrome X-linked 309050 Lutheran suppressor X-linked 300010 A-11 gene 300074 X chromosome-controlling ele…	MTMR8|0.017673392|75.49%	1CG-001|3CG-035|3CG-042|3CG-047|3CG-064|3CG-173|8CG-004
DGC	MTRNR2L10	7	100	X	p22.33|p11.1	301780 Arylsulfatase C f form 300345 Microphthalmia isolated with coloboma 1 300471 Cubitus valgus with mental retardation and unusual facies 300484 Orofaciodigital syndrome VIII 300716 Mental retardation X-linked 95 300719 Deafness cataract retinitis pigmentosa and sperm abnormalities 300864 Cerebral-cerebellar-coloboma syndrome X-linked 309050 Lutheran suppressor X-linked 301067 Family with seq…	MTRNR2L10|0.002777967|89.08%	1CG-001|3CG-035|3CG-042|3CG-047|3CG-064|3CG-173|8CG-004
DGC	MXRA5	7	100	X	p22.33|p11.1	301780 Arylsulfatase C f form 300345 Microphthalmia isolated with coloboma 1 300471 Cubitus valgus with mental retardation and unusual facies 300484 Orofaciodigital syndrome VIII 300716 Mental retardation X-linked 95 300719 Deafness cataract retinitis pigmentosa and sperm abnormalities 300864 Cerebral-cerebellar-coloboma syndrome X-linked 309050 Lutheran suppressor X-linked 301067 Family with seq…	MXRA5|0.002168491|90.52%	1CG-001|3CG-035|3CG-042|3CG-047|3CG-064|3CG-173|8CG-004
DGC	NAA10	7	100	X	q11.1|q28	300345 Microphthalmia isolated with coloboma 1 300471 Cubitus valgus with mental retardation and unusual facies 300484 Orofaciodigital syndrome VIII 300716 Mental retardation X-linked 95 300719 Deafness cataract retinitis pigmentosa and sperm abnormalities 300864 Cerebral-cerebellar-coloboma syndrome X-linked 309050 Lutheran suppressor X-linked 300010 A-11 gene 300074 X chromosome-controlling ele…	NAA10|0.222874156|34.08%	1CG-001|3CG-035|3CG-042|3CG-047|3CG-064|3CG-173|8CG-004
DGC	NAP1L2	7	100	X	q11.1|q28	300345 Microphthalmia isolated with coloboma 1 300471 Cubitus valgus with mental retardation and unusual facies 300484 Orofaciodigital syndrome VIII 300716 Mental retardation X-linked 95 300719 Deafness cataract retinitis pigmentosa and sperm abnormalities 300864 Cerebral-cerebellar-coloboma syndrome X-linked 309050 Lutheran suppressor X-linked 300010 A-11 gene 300074 X chromosome-controlling ele…	NAP1L2|0.019902142|74.23%	1CG-001|3CG-035|3CG-042|3CG-047|3CG-064|3CG-173|8CG-004
DGC	NAP1L3	7	100	X	q11.1|q28	300345 Microphthalmia isolated with coloboma 1 300471 Cubitus valgus with mental retardation and unusual facies 300484 Orofaciodigital syndrome VIII 300716 Mental retardation X-linked 95 300719 Deafness cataract retinitis pigmentosa and sperm abnormalities 300864 Cerebral-cerebellar-coloboma syndrome X-linked 309050 Lutheran suppressor X-linked 300010 A-11 gene 300074 X chromosome-controlling ele…	NAP1L3|0.01242601|78.94%	1CG-001|3CG-035|3CG-042|3CG-047|3CG-064|3CG-173|8CG-004
DGC	NAP1L6P	7	100	X	q11.1|q28	300345 Microphthalmia isolated with coloboma 1 300471 Cubitus valgus with mental retardation and unusual facies 300484 Orofaciodigital syndrome VIII 300716 Mental retardation X-linked 95 300719 Deafness cataract retinitis pigmentosa and sperm abnormalities 300864 Cerebral-cerebellar-coloboma syndrome X-linked 309050 Lutheran suppressor X-linked 300010 A-11 gene 300074 X chromosome-controlling ele…	NA	1CG-001|3CG-035|3CG-042|3CG-047|3CG-064|3CG-173|8CG-004
DGC	NBDY	7	100	X	p22.33|p11.1	301780 Arylsulfatase C f form 300345 Microphthalmia isolated with coloboma 1 300471 Cubitus valgus with mental retardation and unusual facies 300484 Orofaciodigital syndrome VIII 300716 Mental retardation X-linked 95 300719 Deafness cataract retinitis pigmentosa and sperm abnormalities 300864 Cerebral-cerebellar-coloboma syndrome X-linked 309050 Lutheran suppressor X-linked 301067 Family with seq…	NA	1CG-001|3CG-035|3CG-042|3CG-047|3CG-064|3CG-173|8CG-004
DGC	NCBP2L	7	100	X	q11.1|q28	300345 Microphthalmia isolated with coloboma 1 300471 Cubitus valgus with mental retardation and unusual facies 300484 Orofaciodigital syndrome VIII 300716 Mental retardation X-linked 95 300719 Deafness cataract retinitis pigmentosa and sperm abnormalities 300864 Cerebral-cerebellar-coloboma syndrome X-linked 309050 Lutheran suppressor X-linked 300010 A-11 gene 300074 X chromosome-controlling ele…	NCBP2L|0.002071115|90.8%	1CG-001|3CG-035|3CG-042|3CG-047|3CG-064|3CG-173|8CG-004
DGC	NDP	7	100	X	p22.33|p11.1	301780 Arylsulfatase C f form 300345 Microphthalmia isolated with coloboma 1 300471 Cubitus valgus with mental retardation and unusual facies 300484 Orofaciodigital syndrome VIII 300716 Mental retardation X-linked 95 300719 Deafness cataract retinitis pigmentosa and sperm abnormalities 300864 Cerebral-cerebellar-coloboma syndrome X-linked 309050 Lutheran suppressor X-linked 301067 Family with seq…	NDP|0.886052126|3.81%	1CG-001|3CG-035|3CG-042|3CG-047|3CG-064|3CG-173|8CG-004
DGC	NDP-AS1	7	100	X	p22.33|p11.1	301780 Arylsulfatase C f form 300345 Microphthalmia isolated with coloboma 1 300471 Cubitus valgus with mental retardation and unusual facies 300484 Orofaciodigital syndrome VIII 300716 Mental retardation X-linked 95 300719 Deafness cataract retinitis pigmentosa and sperm abnormalities 300864 Cerebral-cerebellar-coloboma syndrome X-linked 309050 Lutheran suppressor X-linked 301067 Family with seq…	NA	1CG-001|3CG-035|3CG-042|3CG-047|3CG-064|3CG-173|8CG-004
DGC	NDUFA1	7	100	X	q11.1|q28	300345 Microphthalmia isolated with coloboma 1 300471 Cubitus valgus with mental retardation and unusual facies 300484 Orofaciodigital syndrome VIII 300716 Mental retardation X-linked 95 300719 Deafness cataract retinitis pigmentosa and sperm abnormalities 300864 Cerebral-cerebellar-coloboma syndrome X-linked 309050 Lutheran suppressor X-linked 300010 A-11 gene 300074 X chromosome-controlling ele…	NDUFA1|0.056260009|60.85%	1CG-001|3CG-035|3CG-042|3CG-047|3CG-064|3CG-173|8CG-004
DGC	NDUFB11	7	100	X	p22.33|p11.1	301780 Arylsulfatase C f form 300345 Microphthalmia isolated with coloboma 1 300471 Cubitus valgus with mental retardation and unusual facies 300484 Orofaciodigital syndrome VIII 300716 Mental retardation X-linked 95 300719 Deafness cataract retinitis pigmentosa and sperm abnormalities 300864 Cerebral-cerebellar-coloboma syndrome X-linked 309050 Lutheran suppressor X-linked 301067 Family with seq…	NDUFB11|0.145710348|43.62%	1CG-001|3CG-035|3CG-042|3CG-047|3CG-064|3CG-173|8CG-004
DGC	NEXMIF	7	100	X	q11.1|q28	300345 Microphthalmia isolated with coloboma 1 300471 Cubitus valgus with mental retardation and unusual facies 300484 Orofaciodigital syndrome VIII 300716 Mental retardation X-linked 95 300719 Deafness cataract retinitis pigmentosa and sperm abnormalities 300864 Cerebral-cerebellar-coloboma syndrome X-linked 309050 Lutheran suppressor X-linked 300010 A-11 gene 300074 X chromosome-controlling ele…	NA	1CG-001|3CG-035|3CG-042|3CG-047|3CG-064|3CG-173|8CG-004
DGC	NHS	7	100	X	p22.33|p11.1	301780 Arylsulfatase C f form 300345 Microphthalmia isolated with coloboma 1 300471 Cubitus valgus with mental retardation and unusual facies 300484 Orofaciodigital syndrome VIII 300716 Mental retardation X-linked 95 300719 Deafness cataract retinitis pigmentosa and sperm abnormalities 300864 Cerebral-cerebellar-coloboma syndrome X-linked 309050 Lutheran suppressor X-linked 301067 Family with seq…	NHS|0.894481224|3.57%	1CG-001|3CG-035|3CG-042|3CG-047|3CG-064|3CG-173|8CG-004
DGC	NHS-AS1	7	100	X	p22.33|p11.1	301780 Arylsulfatase C f form 300345 Microphthalmia isolated with coloboma 1 300471 Cubitus valgus with mental retardation and unusual facies 300484 Orofaciodigital syndrome VIII 300716 Mental retardation X-linked 95 300719 Deafness cataract retinitis pigmentosa and sperm abnormalities 300864 Cerebral-cerebellar-coloboma syndrome X-linked 309050 Lutheran suppressor X-linked 301067 Family with seq…	NA	1CG-001|3CG-035|3CG-042|3CG-047|3CG-064|3CG-173|8CG-004
DGC	NHSL2	7	100	X	q11.1|q28	300345 Microphthalmia isolated with coloboma 1 300471 Cubitus valgus with mental retardation and unusual facies 300484 Orofaciodigital syndrome VIII 300716 Mental retardation X-linked 95 300719 Deafness cataract retinitis pigmentosa and sperm abnormalities 300864 Cerebral-cerebellar-coloboma syndrome X-linked 309050 Lutheran suppressor X-linked 300010 A-11 gene 300074 X chromosome-controlling ele…	NHSL2|0.147177551|43.44%	1CG-001|3CG-035|3CG-042|3CG-047|3CG-064|3CG-173|8CG-004
DGC	NKAP	7	100	X	q11.1|q28	300345 Microphthalmia isolated with coloboma 1 300471 Cubitus valgus with mental retardation and unusual facies 300484 Orofaciodigital syndrome VIII 300716 Mental retardation X-linked 95 300719 Deafness cataract retinitis pigmentosa and sperm abnormalities 300864 Cerebral-cerebellar-coloboma syndrome X-linked 309050 Lutheran suppressor X-linked 300010 A-11 gene 300074 X chromosome-controlling ele…	NKAP|0.086083542|53.94%	1CG-001|3CG-035|3CG-042|3CG-047|3CG-064|3CG-173|8CG-004
DGC	NKAPP1	7	100	X	q11.1|q28	300345 Microphthalmia isolated with coloboma 1 300471 Cubitus valgus with mental retardation and unusual facies 300484 Orofaciodigital syndrome VIII 300716 Mental retardation X-linked 95 300719 Deafness cataract retinitis pigmentosa and sperm abnormalities 300864 Cerebral-cerebellar-coloboma syndrome X-linked 309050 Lutheran suppressor X-linked 300010 A-11 gene 300074 X chromosome-controlling ele…	NA	1CG-001|3CG-035|3CG-042|3CG-047|3CG-064|3CG-173|8CG-004
DGC	NKRF	7	100	X	q11.1|q28	300345 Microphthalmia isolated with coloboma 1 300471 Cubitus valgus with mental retardation and unusual facies 300484 Orofaciodigital syndrome VIII 300716 Mental retardation X-linked 95 300719 Deafness cataract retinitis pigmentosa and sperm abnormalities 300864 Cerebral-cerebellar-coloboma syndrome X-linked 309050 Lutheran suppressor X-linked 300010 A-11 gene 300074 X chromosome-controlling ele…	NKRF|0.386710582|21.63%	1CG-001|3CG-035|3CG-042|3CG-047|3CG-064|3CG-173|8CG-004
DGC	NLGN3	7	100	X	q11.1|q28	300345 Microphthalmia isolated with coloboma 1 300471 Cubitus valgus with mental retardation and unusual facies 300484 Orofaciodigital syndrome VIII 300716 Mental retardation X-linked 95 300719 Deafness cataract retinitis pigmentosa and sperm abnormalities 300864 Cerebral-cerebellar-coloboma syndrome X-linked 309050 Lutheran suppressor X-linked 300010 A-11 gene 300074 X chromosome-controlling ele…	NLGN3|0.634479169|10.65%	1CG-001|3CG-035|3CG-042|3CG-047|3CG-064|3CG-173|8CG-004
DGC	NLGN4X	7	100	X	p22.33|p11.1	301780 Arylsulfatase C f form 300345 Microphthalmia isolated with coloboma 1 300471 Cubitus valgus with mental retardation and unusual facies 300484 Orofaciodigital syndrome VIII 300716 Mental retardation X-linked 95 300719 Deafness cataract retinitis pigmentosa and sperm abnormalities 300864 Cerebral-cerebellar-coloboma syndrome X-linked 309050 Lutheran suppressor X-linked 301067 Family with seq…	NLGN4X|0.04429979|64.4%	1CG-001|3CG-035|3CG-042|3CG-047|3CG-064|3CG-173|8CG-004
DGC	NLRP2B	7	100	X	p22.33|p11.1	301780 Arylsulfatase C f form 300345 Microphthalmia isolated with coloboma 1 300471 Cubitus valgus with mental retardation and unusual facies 300484 Orofaciodigital syndrome VIII 300716 Mental retardation X-linked 95 300719 Deafness cataract retinitis pigmentosa and sperm abnormalities 300864 Cerebral-cerebellar-coloboma syndrome X-linked 309050 Lutheran suppressor X-linked 301067 Family with seq…	NA	1CG-001|3CG-035|3CG-042|3CG-047|3CG-064|3CG-173|8CG-004
DGC	NONO	7	100	X	q11.1|q28	300345 Microphthalmia isolated with coloboma 1 300471 Cubitus valgus with mental retardation and unusual facies 300484 Orofaciodigital syndrome VIII 300716 Mental retardation X-linked 95 300719 Deafness cataract retinitis pigmentosa and sperm abnormalities 300864 Cerebral-cerebellar-coloboma syndrome X-linked 309050 Lutheran suppressor X-linked 300010 A-11 gene 300074 X chromosome-controlling ele…	NONO|0.874607321|4.11%	1CG-001|3CG-035|3CG-042|3CG-047|3CG-064|3CG-173|8CG-004
DGC	NOX1	7	100	X	q11.1|q28	300345 Microphthalmia isolated with coloboma 1 300471 Cubitus valgus with mental retardation and unusual facies 300484 Orofaciodigital syndrome VIII 300716 Mental retardation X-linked 95 300719 Deafness cataract retinitis pigmentosa and sperm abnormalities 300864 Cerebral-cerebellar-coloboma syndrome X-linked 309050 Lutheran suppressor X-linked 300010 A-11 gene 300074 X chromosome-controlling ele…	NOX1|0.219857423|34.43%	1CG-001|3CG-035|3CG-042|3CG-047|3CG-064|3CG-173|8CG-004
DGC	NR0B1	7	100	X	p22.33|p11.1	301780 Arylsulfatase C f form 300345 Microphthalmia isolated with coloboma 1 300471 Cubitus valgus with mental retardation and unusual facies 300484 Orofaciodigital syndrome VIII 300716 Mental retardation X-linked 95 300719 Deafness cataract retinitis pigmentosa and sperm abnormalities 300864 Cerebral-cerebellar-coloboma syndrome X-linked 309050 Lutheran suppressor X-linked 301067 Family with seq…	NR0B1|0.508741554|15.44%	1CG-001|3CG-035|3CG-042|3CG-047|3CG-064|3CG-173|8CG-004
DGC	NRK	7	100	X	q11.1|q28	300345 Microphthalmia isolated with coloboma 1 300471 Cubitus valgus with mental retardation and unusual facies 300484 Orofaciodigital syndrome VIII 300716 Mental retardation X-linked 95 300719 Deafness cataract retinitis pigmentosa and sperm abnormalities 300864 Cerebral-cerebellar-coloboma syndrome X-linked 309050 Lutheran suppressor X-linked 300010 A-11 gene 300074 X chromosome-controlling ele…	NRK|0.133592054|45.35%	1CG-001|3CG-035|3CG-042|3CG-047|3CG-064|3CG-173|8CG-004
DGC	NSDHL	7	100	X	q11.1|q28	300345 Microphthalmia isolated with coloboma 1 300471 Cubitus valgus with mental retardation and unusual facies 300484 Orofaciodigital syndrome VIII 300716 Mental retardation X-linked 95 300719 Deafness cataract retinitis pigmentosa and sperm abnormalities 300864 Cerebral-cerebellar-coloboma syndrome X-linked 309050 Lutheran suppressor X-linked 300010 A-11 gene 300074 X chromosome-controlling ele…	NSDHL|0.042707237|64.89%	1CG-001|3CG-035|3CG-042|3CG-047|3CG-064|3CG-173|8CG-004
DGC	NUDT10	7	100	X	p22.33|p11.1	301780 Arylsulfatase C f form 300345 Microphthalmia isolated with coloboma 1 300471 Cubitus valgus with mental retardation and unusual facies 300484 Orofaciodigital syndrome VIII 300716 Mental retardation X-linked 95 300719 Deafness cataract retinitis pigmentosa and sperm abnormalities 300864 Cerebral-cerebellar-coloboma syndrome X-linked 309050 Lutheran suppressor X-linked 301067 Family with seq…	NUDT10|0.019828109|74.27%	1CG-001|3CG-035|3CG-042|3CG-047|3CG-064|3CG-173|8CG-004
DGC	NUDT11	7	100	X	p22.33|p11.1	301780 Arylsulfatase C f form 300345 Microphthalmia isolated with coloboma 1 300471 Cubitus valgus with mental retardation and unusual facies 300484 Orofaciodigital syndrome VIII 300716 Mental retardation X-linked 95 300719 Deafness cataract retinitis pigmentosa and sperm abnormalities 300864 Cerebral-cerebellar-coloboma syndrome X-linked 309050 Lutheran suppressor X-linked 301067 Family with seq…	NUDT11|0.016769294|76.04%	1CG-001|3CG-035|3CG-042|3CG-047|3CG-064|3CG-173|8CG-004
DGC	NUP62CL	7	100	X	q11.1|q28	300345 Microphthalmia isolated with coloboma 1 300471 Cubitus valgus with mental retardation and unusual facies 300484 Orofaciodigital syndrome VIII 300716 Mental retardation X-linked 95 300719 Deafness cataract retinitis pigmentosa and sperm abnormalities 300864 Cerebral-cerebellar-coloboma syndrome X-linked 309050 Lutheran suppressor X-linked 300010 A-11 gene 300074 X chromosome-controlling ele…	NUP62CL|0.010647897|80.41%	1CG-001|3CG-035|3CG-042|3CG-047|3CG-064|3CG-173|8CG-004
DGC	NXF2	7	100	X	q11.1|q28	300345 Microphthalmia isolated with coloboma 1 300471 Cubitus valgus with mental retardation and unusual facies 300484 Orofaciodigital syndrome VIII 300716 Mental retardation X-linked 95 300719 Deafness cataract retinitis pigmentosa and sperm abnormalities 300864 Cerebral-cerebellar-coloboma syndrome X-linked 309050 Lutheran suppressor X-linked 300010 A-11 gene 300074 X chromosome-controlling ele…	NXF2|0.001506098|92.76%	1CG-001|3CG-035|3CG-042|3CG-047|3CG-064|3CG-173|8CG-004
DGC	NXF2B	7	100	X	q11.1|q28	300345 Microphthalmia isolated with coloboma 1 300471 Cubitus valgus with mental retardation and unusual facies 300484 Orofaciodigital syndrome VIII 300716 Mental retardation X-linked 95 300719 Deafness cataract retinitis pigmentosa and sperm abnormalities 300864 Cerebral-cerebellar-coloboma syndrome X-linked 309050 Lutheran suppressor X-linked 300010 A-11 gene 300074 X chromosome-controlling ele…	NXF2B|0.001720821|91.79%	1CG-001|3CG-035|3CG-042|3CG-047|3CG-064|3CG-173|8CG-004
DGC	NXF3	7	100	X	q11.1|q28	300345 Microphthalmia isolated with coloboma 1 300471 Cubitus valgus with mental retardation and unusual facies 300484 Orofaciodigital syndrome VIII 300716 Mental retardation X-linked 95 300719 Deafness cataract retinitis pigmentosa and sperm abnormalities 300864 Cerebral-cerebellar-coloboma syndrome X-linked 309050 Lutheran suppressor X-linked 300010 A-11 gene 300074 X chromosome-controlling ele…	NXF3|0.002050096|90.85%	1CG-001|3CG-035|3CG-042|3CG-047|3CG-064|3CG-173|8CG-004
DGC	NXF4	7	100	X	q11.1|q28	300345 Microphthalmia isolated with coloboma 1 300471 Cubitus valgus with mental retardation and unusual facies 300484 Orofaciodigital syndrome VIII 300716 Mental retardation X-linked 95 300719 Deafness cataract retinitis pigmentosa and sperm abnormalities 300864 Cerebral-cerebellar-coloboma syndrome X-linked 309050 Lutheran suppressor X-linked 300010 A-11 gene 300074 X chromosome-controlling ele…	NA	1CG-001|3CG-035|3CG-042|3CG-047|3CG-064|3CG-173|8CG-004
DGC	NXF5	7	100	X	q11.1|q28	300345 Microphthalmia isolated with coloboma 1 300471 Cubitus valgus with mental retardation and unusual facies 300484 Orofaciodigital syndrome VIII 300716 Mental retardation X-linked 95 300719 Deafness cataract retinitis pigmentosa and sperm abnormalities 300864 Cerebral-cerebellar-coloboma syndrome X-linked 309050 Lutheran suppressor X-linked 300010 A-11 gene 300074 X chromosome-controlling ele…	NXF5|0.002367398|89.99%	1CG-001|3CG-035|3CG-042|3CG-047|3CG-064|3CG-173|8CG-004
DGC	NXT2	7	100	X	q11.1|q28	300345 Microphthalmia isolated with coloboma 1 300471 Cubitus valgus with mental retardation and unusual facies 300484 Orofaciodigital syndrome VIII 300716 Mental retardation X-linked 95 300719 Deafness cataract retinitis pigmentosa and sperm abnormalities 300864 Cerebral-cerebellar-coloboma syndrome X-linked 309050 Lutheran suppressor X-linked 300010 A-11 gene 300074 X chromosome-controlling ele…	NXT2|0.183641601|38.59%	1CG-001|3CG-035|3CG-042|3CG-047|3CG-064|3CG-173|8CG-004
DGC	NYX	7	100	X	p22.33|p11.1	301780 Arylsulfatase C f form 300345 Microphthalmia isolated with coloboma 1 300471 Cubitus valgus with mental retardation and unusual facies 300484 Orofaciodigital syndrome VIII 300716 Mental retardation X-linked 95 300719 Deafness cataract retinitis pigmentosa and sperm abnormalities 300864 Cerebral-cerebellar-coloboma syndrome X-linked 309050 Lutheran suppressor X-linked 301067 Family with seq…	NYX|0.066151034|58.33%	1CG-001|3CG-035|3CG-042|3CG-047|3CG-064|3CG-173|8CG-004
DGC	OCRL	7	100	X	q11.1|q28	300345 Microphthalmia isolated with coloboma 1 300471 Cubitus valgus with mental retardation and unusual facies 300484 Orofaciodigital syndrome VIII 300716 Mental retardation X-linked 95 300719 Deafness cataract retinitis pigmentosa and sperm abnormalities 300864 Cerebral-cerebellar-coloboma syndrome X-linked 309050 Lutheran suppressor X-linked 300010 A-11 gene 300074 X chromosome-controlling ele…	OCRL|0.531676693|14.52%	1CG-001|3CG-035|3CG-042|3CG-047|3CG-064|3CG-173|8CG-004
DGC	OFD1	7	100	X	p22.33|p11.1	301780 Arylsulfatase C f form 300345 Microphthalmia isolated with coloboma 1 300471 Cubitus valgus with mental retardation and unusual facies 300484 Orofaciodigital syndrome VIII 300716 Mental retardation X-linked 95 300719 Deafness cataract retinitis pigmentosa and sperm abnormalities 300864 Cerebral-cerebellar-coloboma syndrome X-linked 309050 Lutheran suppressor X-linked 301067 Family with seq…	OFD1|0.028389991|70.25%	1CG-001|3CG-035|3CG-042|3CG-047|3CG-064|3CG-173|8CG-004
DGC	OGT	7	100	X	q11.1|q28	300345 Microphthalmia isolated with coloboma 1 300471 Cubitus valgus with mental retardation and unusual facies 300484 Orofaciodigital syndrome VIII 300716 Mental retardation X-linked 95 300719 Deafness cataract retinitis pigmentosa and sperm abnormalities 300864 Cerebral-cerebellar-coloboma syndrome X-linked 309050 Lutheran suppressor X-linked 300010 A-11 gene 300074 X chromosome-controlling ele…	OGT|0.924475508|2.87%	1CG-001|3CG-035|3CG-042|3CG-047|3CG-064|3CG-173|8CG-004
DGC	OPHN1	7	100	X	q11.1|q28	300345 Microphthalmia isolated with coloboma 1 300471 Cubitus valgus with mental retardation and unusual facies 300484 Orofaciodigital syndrome VIII 300716 Mental retardation X-linked 95 300719 Deafness cataract retinitis pigmentosa and sperm abnormalities 300864 Cerebral-cerebellar-coloboma syndrome X-linked 309050 Lutheran suppressor X-linked 300010 A-11 gene 300074 X chromosome-controlling ele…	OPHN1|0.210927262|35.46%	1CG-001|3CG-035|3CG-042|3CG-047|3CG-064|3CG-173|8CG-004
DGC	OPN1LW	7	100	X	q11.1|q28	300345 Microphthalmia isolated with coloboma 1 300471 Cubitus valgus with mental retardation and unusual facies 300484 Orofaciodigital syndrome VIII 300716 Mental retardation X-linked 95 300719 Deafness cataract retinitis pigmentosa and sperm abnormalities 300864 Cerebral-cerebellar-coloboma syndrome X-linked 309050 Lutheran suppressor X-linked 300010 A-11 gene 300074 X chromosome-controlling ele…	OPN1LW|0.035400156|67.35%	1CG-001|3CG-035|3CG-042|3CG-047|3CG-064|3CG-173|8CG-004
DGC	OPN1MW	7	100	X	q11.1|q28	300345 Microphthalmia isolated with coloboma 1 300471 Cubitus valgus with mental retardation and unusual facies 300484 Orofaciodigital syndrome VIII 300716 Mental retardation X-linked 95 300719 Deafness cataract retinitis pigmentosa and sperm abnormalities 300864 Cerebral-cerebellar-coloboma syndrome X-linked 309050 Lutheran suppressor X-linked 300010 A-11 gene 300074 X chromosome-controlling ele…	OPN1MW|0.025010125|71.8%	1CG-001|3CG-035|3CG-042|3CG-047|3CG-064|3CG-173|8CG-004
DGC	OPN1MW2	7	100	X	q11.1|q28	300345 Microphthalmia isolated with coloboma 1 300471 Cubitus valgus with mental retardation and unusual facies 300484 Orofaciodigital syndrome VIII 300716 Mental retardation X-linked 95 300719 Deafness cataract retinitis pigmentosa and sperm abnormalities 300864 Cerebral-cerebellar-coloboma syndrome X-linked 309050 Lutheran suppressor X-linked 300010 A-11 gene 300074 X chromosome-controlling ele…	OPN1MW2|0.016892753|75.92%	1CG-001|3CG-035|3CG-042|3CG-047|3CG-064|3CG-173|8CG-004
DGC	OPN1MW3	7	100	X	q11.1|q28	300345 Microphthalmia isolated with coloboma 1 300471 Cubitus valgus with mental retardation and unusual facies 300484 Orofaciodigital syndrome VIII 300716 Mental retardation X-linked 95 300719 Deafness cataract retinitis pigmentosa and sperm abnormalities 300864 Cerebral-cerebellar-coloboma syndrome X-linked 309050 Lutheran suppressor X-linked 300010 A-11 gene 300074 X chromosome-controlling ele…	NA	1CG-001|3CG-035|3CG-042|3CG-047|3CG-064|3CG-173|8CG-004
DGC	OR13H1	7	100	X	q11.1|q28	300345 Microphthalmia isolated with coloboma 1 300471 Cubitus valgus with mental retardation and unusual facies 300484 Orofaciodigital syndrome VIII 300716 Mental retardation X-linked 95 300719 Deafness cataract retinitis pigmentosa and sperm abnormalities 300864 Cerebral-cerebellar-coloboma syndrome X-linked 309050 Lutheran suppressor X-linked 300010 A-11 gene 300074 X chromosome-controlling ele…	OR13H1|0.019316355|74.52%	1CG-001|3CG-035|3CG-042|3CG-047|3CG-064|3CG-173|8CG-004
DGC	OTC	7	100	X	p22.33|p11.1	301780 Arylsulfatase C f form 300345 Microphthalmia isolated with coloboma 1 300471 Cubitus valgus with mental retardation and unusual facies 300484 Orofaciodigital syndrome VIII 300716 Mental retardation X-linked 95 300719 Deafness cataract retinitis pigmentosa and sperm abnormalities 300864 Cerebral-cerebellar-coloboma syndrome X-linked 309050 Lutheran suppressor X-linked 301067 Family with seq…	OTC|0.906729057|3.31%	1CG-001|3CG-035|3CG-042|3CG-047|3CG-064|3CG-173|8CG-004
DGC	OTUD5	7	100	X	p22.33|p11.1	301780 Arylsulfatase C f form 300345 Microphthalmia isolated with coloboma 1 300471 Cubitus valgus with mental retardation and unusual facies 300484 Orofaciodigital syndrome VIII 300716 Mental retardation X-linked 95 300719 Deafness cataract retinitis pigmentosa and sperm abnormalities 300864 Cerebral-cerebellar-coloboma syndrome X-linked 309050 Lutheran suppressor X-linked 301067 Family with seq…	OTUD5|0.139685418|44.43%	1CG-001|3CG-035|3CG-042|3CG-047|3CG-064|3CG-173|8CG-004
DGC	OTUD6A	7	100	X	q11.1|q28	300345 Microphthalmia isolated with coloboma 1 300471 Cubitus valgus with mental retardation and unusual facies 300484 Orofaciodigital syndrome VIII 300716 Mental retardation X-linked 95 300719 Deafness cataract retinitis pigmentosa and sperm abnormalities 300864 Cerebral-cerebellar-coloboma syndrome X-linked 309050 Lutheran suppressor X-linked 300010 A-11 gene 300074 X chromosome-controlling ele…	OTUD6A|0.001433375|93.17%	1CG-001|3CG-035|3CG-042|3CG-047|3CG-064|3CG-173|8CG-004
DGC	P2RY10	7	100	X	q11.1|q28	300345 Microphthalmia isolated with coloboma 1 300471 Cubitus valgus with mental retardation and unusual facies 300484 Orofaciodigital syndrome VIII 300716 Mental retardation X-linked 95 300719 Deafness cataract retinitis pigmentosa and sperm abnormalities 300864 Cerebral-cerebellar-coloboma syndrome X-linked 309050 Lutheran suppressor X-linked 300010 A-11 gene 300074 X chromosome-controlling ele…	P2RY10|0.097758264|51.57%	1CG-001|3CG-035|3CG-042|3CG-047|3CG-064|3CG-173|8CG-004
DGC	P2RY4	7	100	X	q11.1|q28	300345 Microphthalmia isolated with coloboma 1 300471 Cubitus valgus with mental retardation and unusual facies 300484 Orofaciodigital syndrome VIII 300716 Mental retardation X-linked 95 300719 Deafness cataract retinitis pigmentosa and sperm abnormalities 300864 Cerebral-cerebellar-coloboma syndrome X-linked 309050 Lutheran suppressor X-linked 300010 A-11 gene 300074 X chromosome-controlling ele…	P2RY4|0.035696267|67.23%	1CG-001|3CG-035|3CG-042|3CG-047|3CG-064|3CG-173|8CG-004
DGC	PABPC1L2A	7	100	X	q11.1|q28	300345 Microphthalmia isolated with coloboma 1 300471 Cubitus valgus with mental retardation and unusual facies 300484 Orofaciodigital syndrome VIII 300716 Mental retardation X-linked 95 300719 Deafness cataract retinitis pigmentosa and sperm abnormalities 300864 Cerebral-cerebellar-coloboma syndrome X-linked 309050 Lutheran suppressor X-linked 300010 A-11 gene 300074 X chromosome-controlling ele…	PABPC1L2A|0.025516461|71.56%	1CG-001|3CG-035|3CG-042|3CG-047|3CG-064|3CG-173|8CG-004
DGC	PABPC1L2B	7	100	X	q11.1|q28	300345 Microphthalmia isolated with coloboma 1 300471 Cubitus valgus with mental retardation and unusual facies 300484 Orofaciodigital syndrome VIII 300716 Mental retardation X-linked 95 300719 Deafness cataract retinitis pigmentosa and sperm abnormalities 300864 Cerebral-cerebellar-coloboma syndrome X-linked 309050 Lutheran suppressor X-linked 300010 A-11 gene 300074 X chromosome-controlling ele…	PABPC1L2B|0.026701754|71.03%	1CG-001|3CG-035|3CG-042|3CG-047|3CG-064|3CG-173|8CG-004
DGC	PABPC1L2B-AS1	7	100	X	q11.1|q28	300345 Microphthalmia isolated with coloboma 1 300471 Cubitus valgus with mental retardation and unusual facies 300484 Orofaciodigital syndrome VIII 300716 Mental retardation X-linked 95 300719 Deafness cataract retinitis pigmentosa and sperm abnormalities 300864 Cerebral-cerebellar-coloboma syndrome X-linked 309050 Lutheran suppressor X-linked 300010 A-11 gene 300074 X chromosome-controlling ele…	NA	1CG-001|3CG-035|3CG-042|3CG-047|3CG-064|3CG-173|8CG-004
DGC	PABPC5	7	100	X	q11.1|q28	300345 Microphthalmia isolated with coloboma 1 300471 Cubitus valgus with mental retardation and unusual facies 300484 Orofaciodigital syndrome VIII 300716 Mental retardation X-linked 95 300719 Deafness cataract retinitis pigmentosa and sperm abnormalities 300864 Cerebral-cerebellar-coloboma syndrome X-linked 309050 Lutheran suppressor X-linked 300010 A-11 gene 300074 X chromosome-controlling ele…	PABPC5|0.096243095|51.88%	1CG-001|3CG-035|3CG-042|3CG-047|3CG-064|3CG-173|8CG-004
DGC	PABPC5-AS1	7	100	X	q11.1|q28	300345 Microphthalmia isolated with coloboma 1 300471 Cubitus valgus with mental retardation and unusual facies 300484 Orofaciodigital syndrome VIII 300716 Mental retardation X-linked 95 300719 Deafness cataract retinitis pigmentosa and sperm abnormalities 300864 Cerebral-cerebellar-coloboma syndrome X-linked 309050 Lutheran suppressor X-linked 300010 A-11 gene 300074 X chromosome-controlling ele…	NA	1CG-001|3CG-035|3CG-042|3CG-047|3CG-064|3CG-173|8CG-004
DGC	PAGE1	7	100	X	p22.33|p11.1	301780 Arylsulfatase C f form 300345 Microphthalmia isolated with coloboma 1 300471 Cubitus valgus with mental retardation and unusual facies 300484 Orofaciodigital syndrome VIII 300716 Mental retardation X-linked 95 300719 Deafness cataract retinitis pigmentosa and sperm abnormalities 300864 Cerebral-cerebellar-coloboma syndrome X-linked 309050 Lutheran suppressor X-linked 301067 Family with seq…	PAGE1|0.000721048|97.15%	1CG-001|3CG-035|3CG-042|3CG-047|3CG-064|3CG-173|8CG-004
DGC	PAGE2	7	100	X	p22.33|p11.1	301780 Arylsulfatase C f form 300345 Microphthalmia isolated with coloboma 1 300471 Cubitus valgus with mental retardation and unusual facies 300484 Orofaciodigital syndrome VIII 300716 Mental retardation X-linked 95 300719 Deafness cataract retinitis pigmentosa and sperm abnormalities 300864 Cerebral-cerebellar-coloboma syndrome X-linked 309050 Lutheran suppressor X-linked 301067 Family with seq…	PAGE2|0.000820462|96.53%	1CG-001|3CG-035|3CG-042|3CG-047|3CG-064|3CG-173|8CG-004
DGC	PAGE2B	7	100	X	p22.33|p11.1	301780 Arylsulfatase C f form 300345 Microphthalmia isolated with coloboma 1 300471 Cubitus valgus with mental retardation and unusual facies 300484 Orofaciodigital syndrome VIII 300716 Mental retardation X-linked 95 300719 Deafness cataract retinitis pigmentosa and sperm abnormalities 300864 Cerebral-cerebellar-coloboma syndrome X-linked 309050 Lutheran suppressor X-linked 301067 Family with seq…	PAGE2B|0.000785529|96.76%	1CG-001|3CG-035|3CG-042|3CG-047|3CG-064|3CG-173|8CG-004
DGC	PAGE3	7	100	X	p22.33|p11.1	301780 Arylsulfatase C f form 300345 Microphthalmia isolated with coloboma 1 300471 Cubitus valgus with mental retardation and unusual facies 300484 Orofaciodigital syndrome VIII 300716 Mental retardation X-linked 95 300719 Deafness cataract retinitis pigmentosa and sperm abnormalities 300864 Cerebral-cerebellar-coloboma syndrome X-linked 309050 Lutheran suppressor X-linked 301067 Family with seq…	PAGE3|0.000757545|96.96%	1CG-001|3CG-035|3CG-042|3CG-047|3CG-064|3CG-173|8CG-004
DGC	PAGE4	7	100	X	p22.33|p11.1	301780 Arylsulfatase C f form 300345 Microphthalmia isolated with coloboma 1 300471 Cubitus valgus with mental retardation and unusual facies 300484 Orofaciodigital syndrome VIII 300716 Mental retardation X-linked 95 300719 Deafness cataract retinitis pigmentosa and sperm abnormalities 300864 Cerebral-cerebellar-coloboma syndrome X-linked 309050 Lutheran suppressor X-linked 301067 Family with seq…	PAGE4|0.000857477|96.31%	1CG-001|3CG-035|3CG-042|3CG-047|3CG-064|3CG-173|8CG-004
DGC	PAGE5	7	100	X	p22.33|p11.1	301780 Arylsulfatase C f form 300345 Microphthalmia isolated with coloboma 1 300471 Cubitus valgus with mental retardation and unusual facies 300484 Orofaciodigital syndrome VIII 300716 Mental retardation X-linked 95 300719 Deafness cataract retinitis pigmentosa and sperm abnormalities 300864 Cerebral-cerebellar-coloboma syndrome X-linked 309050 Lutheran suppressor X-linked 301067 Family with seq…	PAGE5|0.000770561|96.87%	1CG-001|3CG-035|3CG-042|3CG-047|3CG-064|3CG-173|8CG-004
DGC	PAK3	7	100	X	q11.1|q28	300345 Microphthalmia isolated with coloboma 1 300471 Cubitus valgus with mental retardation and unusual facies 300484 Orofaciodigital syndrome VIII 300716 Mental retardation X-linked 95 300719 Deafness cataract retinitis pigmentosa and sperm abnormalities 300864 Cerebral-cerebellar-coloboma syndrome X-linked 309050 Lutheran suppressor X-linked 300010 A-11 gene 300074 X chromosome-controlling ele…	PAK3|0.832123135|5.06%	1CG-001|3CG-035|3CG-042|3CG-047|3CG-064|3CG-173|8CG-004
DGC	PASD1	7	100	X	q11.1|q28	300345 Microphthalmia isolated with coloboma 1 300471 Cubitus valgus with mental retardation and unusual facies 300484 Orofaciodigital syndrome VIII 300716 Mental retardation X-linked 95 300719 Deafness cataract retinitis pigmentosa and sperm abnormalities 300864 Cerebral-cerebellar-coloboma syndrome X-linked 309050 Lutheran suppressor X-linked 300010 A-11 gene 300074 X chromosome-controlling ele…	PASD1|0.000158076|99.84%	1CG-001|3CG-035|3CG-042|3CG-047|3CG-064|3CG-173|8CG-004
DGC	PBDC1	7	100	X	q11.1|q28	300345 Microphthalmia isolated with coloboma 1 300471 Cubitus valgus with mental retardation and unusual facies 300484 Orofaciodigital syndrome VIII 300716 Mental retardation X-linked 95 300719 Deafness cataract retinitis pigmentosa and sperm abnormalities 300864 Cerebral-cerebellar-coloboma syndrome X-linked 309050 Lutheran suppressor X-linked 300010 A-11 gene 300074 X chromosome-controlling ele…	PBDC1|0.062619204|59.17%	1CG-001|3CG-035|3CG-042|3CG-047|3CG-064|3CG-173|8CG-004
DGC	PCDH11X	7	100	X	q11.1|q28	300345 Microphthalmia isolated with coloboma 1 300471 Cubitus valgus with mental retardation and unusual facies 300484 Orofaciodigital syndrome VIII 300716 Mental retardation X-linked 95 300719 Deafness cataract retinitis pigmentosa and sperm abnormalities 300864 Cerebral-cerebellar-coloboma syndrome X-linked 309050 Lutheran suppressor X-linked 300010 A-11 gene 300074 X chromosome-controlling ele…	PCDH11X|0.213449585|35.17%	1CG-001|3CG-035|3CG-042|3CG-047|3CG-064|3CG-173|8CG-004
DGC	PCDH19	7	100	X	q11.1|q28	300345 Microphthalmia isolated with coloboma 1 300471 Cubitus valgus with mental retardation and unusual facies 300484 Orofaciodigital syndrome VIII 300716 Mental retardation X-linked 95 300719 Deafness cataract retinitis pigmentosa and sperm abnormalities 300864 Cerebral-cerebellar-coloboma syndrome X-linked 309050 Lutheran suppressor X-linked 300010 A-11 gene 300074 X chromosome-controlling ele…	PCDH19|0.768093442|6.65%	1CG-001|3CG-035|3CG-042|3CG-047|3CG-064|3CG-173|8CG-004
DGC	PCSK1N	7	100	X	p22.33|p11.1	301780 Arylsulfatase C f form 300345 Microphthalmia isolated with coloboma 1 300471 Cubitus valgus with mental retardation and unusual facies 300484 Orofaciodigital syndrome VIII 300716 Mental retardation X-linked 95 300719 Deafness cataract retinitis pigmentosa and sperm abnormalities 300864 Cerebral-cerebellar-coloboma syndrome X-linked 309050 Lutheran suppressor X-linked 301067 Family with seq…	PCSK1N|0.012600198|78.81%	1CG-001|3CG-035|3CG-042|3CG-047|3CG-064|3CG-173|8CG-004
DGC	PCYT1B	7	100	X	p22.33|p11.1	301780 Arylsulfatase C f form 300345 Microphthalmia isolated with coloboma 1 300471 Cubitus valgus with mental retardation and unusual facies 300484 Orofaciodigital syndrome VIII 300716 Mental retardation X-linked 95 300719 Deafness cataract retinitis pigmentosa and sperm abnormalities 300864 Cerebral-cerebellar-coloboma syndrome X-linked 309050 Lutheran suppressor X-linked 301067 Family with seq…	PCYT1B|0.472301859|17.09%	1CG-001|3CG-035|3CG-042|3CG-047|3CG-064|3CG-173|8CG-004
DGC	PCYT1B-AS1	7	100	X	p22.33|p11.1	301780 Arylsulfatase C f form 300345 Microphthalmia isolated with coloboma 1 300471 Cubitus valgus with mental retardation and unusual facies 300484 Orofaciodigital syndrome VIII 300716 Mental retardation X-linked 95 300719 Deafness cataract retinitis pigmentosa and sperm abnormalities 300864 Cerebral-cerebellar-coloboma syndrome X-linked 309050 Lutheran suppressor X-linked 301067 Family with seq…	NA	1CG-001|3CG-035|3CG-042|3CG-047|3CG-064|3CG-173|8CG-004
DGC	PDHA1	7	100	X	p22.33|p11.1	301780 Arylsulfatase C f form 300345 Microphthalmia isolated with coloboma 1 300471 Cubitus valgus with mental retardation and unusual facies 300484 Orofaciodigital syndrome VIII 300716 Mental retardation X-linked 95 300719 Deafness cataract retinitis pigmentosa and sperm abnormalities 300864 Cerebral-cerebellar-coloboma syndrome X-linked 309050 Lutheran suppressor X-linked 301067 Family with seq…	PDHA1|0.214623621|35.05%	1CG-001|3CG-035|3CG-042|3CG-047|3CG-064|3CG-173|8CG-004
DGC	PDK3	7	100	X	p22.33|p11.1	301780 Arylsulfatase C f form 300345 Microphthalmia isolated with coloboma 1 300471 Cubitus valgus with mental retardation and unusual facies 300484 Orofaciodigital syndrome VIII 300716 Mental retardation X-linked 95 300719 Deafness cataract retinitis pigmentosa and sperm abnormalities 300864 Cerebral-cerebellar-coloboma syndrome X-linked 309050 Lutheran suppressor X-linked 301067 Family with seq…	PDK3|0.302411039|27.46%	1CG-001|3CG-035|3CG-042|3CG-047|3CG-064|3CG-173|8CG-004
DGC	PDZD11	7	100	X	q11.1|q28	300345 Microphthalmia isolated with coloboma 1 300471 Cubitus valgus with mental retardation and unusual facies 300484 Orofaciodigital syndrome VIII 300716 Mental retardation X-linked 95 300719 Deafness cataract retinitis pigmentosa and sperm abnormalities 300864 Cerebral-cerebellar-coloboma syndrome X-linked 309050 Lutheran suppressor X-linked 300010 A-11 gene 300074 X chromosome-controlling ele…	PDZD11|0.466429053|17.34%	1CG-001|3CG-035|3CG-042|3CG-047|3CG-064|3CG-173|8CG-004
DGC	PDZD4	7	100	X	q11.1|q28	300345 Microphthalmia isolated with coloboma 1 300471 Cubitus valgus with mental retardation and unusual facies 300484 Orofaciodigital syndrome VIII 300716 Mental retardation X-linked 95 300719 Deafness cataract retinitis pigmentosa and sperm abnormalities 300864 Cerebral-cerebellar-coloboma syndrome X-linked 309050 Lutheran suppressor X-linked 300010 A-11 gene 300074 X chromosome-controlling ele…	PDZD4|0.130663739|45.79%	1CG-001|3CG-035|3CG-042|3CG-047|3CG-064|3CG-173|8CG-004
DGC	PFKFB1	7	100	X	p22.33|p11.1	301780 Arylsulfatase C f form 300345 Microphthalmia isolated with coloboma 1 300471 Cubitus valgus with mental retardation and unusual facies 300484 Orofaciodigital syndrome VIII 300716 Mental retardation X-linked 95 300719 Deafness cataract retinitis pigmentosa and sperm abnormalities 300864 Cerebral-cerebellar-coloboma syndrome X-linked 309050 Lutheran suppressor X-linked 301067 Family with seq…	PFKFB1|0.225374389|33.85%	1CG-001|3CG-035|3CG-042|3CG-047|3CG-064|3CG-173|8CG-004
DGC	PGAM4	7	100	X	q11.1|q28	300345 Microphthalmia isolated with coloboma 1 300471 Cubitus valgus with mental retardation and unusual facies 300484 Orofaciodigital syndrome VIII 300716 Mental retardation X-linked 95 300719 Deafness cataract retinitis pigmentosa and sperm abnormalities 300864 Cerebral-cerebellar-coloboma syndrome X-linked 309050 Lutheran suppressor X-linked 300010 A-11 gene 300074 X chromosome-controlling ele…	PGAM4|0.001566259|92.48%	1CG-001|3CG-035|3CG-042|3CG-047|3CG-064|3CG-173|8CG-004
DGC	PGK1	7	100	X	q11.1|q28	300345 Microphthalmia isolated with coloboma 1 300471 Cubitus valgus with mental retardation and unusual facies 300484 Orofaciodigital syndrome VIII 300716 Mental retardation X-linked 95 300719 Deafness cataract retinitis pigmentosa and sperm abnormalities 300864 Cerebral-cerebellar-coloboma syndrome X-linked 309050 Lutheran suppressor X-linked 300010 A-11 gene 300074 X chromosome-controlling ele…	PGK1|0.940776519|2.46%	1CG-001|3CG-035|3CG-042|3CG-047|3CG-064|3CG-173|8CG-004
DGC	PGRMC1	7	100	X	q11.1|q28	300345 Microphthalmia isolated with coloboma 1 300471 Cubitus valgus with mental retardation and unusual facies 300484 Orofaciodigital syndrome VIII 300716 Mental retardation X-linked 95 300719 Deafness cataract retinitis pigmentosa and sperm abnormalities 300864 Cerebral-cerebellar-coloboma syndrome X-linked 309050 Lutheran suppressor X-linked 300010 A-11 gene 300074 X chromosome-controlling ele…	PGRMC1|0.460639132|17.65%	1CG-001|3CG-035|3CG-042|3CG-047|3CG-064|3CG-173|8CG-004
DGC	PHEX	7	100	X	p22.33|p11.1	301780 Arylsulfatase C f form 300345 Microphthalmia isolated with coloboma 1 300471 Cubitus valgus with mental retardation and unusual facies 300484 Orofaciodigital syndrome VIII 300716 Mental retardation X-linked 95 300719 Deafness cataract retinitis pigmentosa and sperm abnormalities 300864 Cerebral-cerebellar-coloboma syndrome X-linked 309050 Lutheran suppressor X-linked 301067 Family with seq…	PHEX|0.755114153|6.97%	1CG-001|3CG-035|3CG-042|3CG-047|3CG-064|3CG-173|8CG-004
DGC	PHEX-AS1	7	100	X	p22.33|p11.1	301780 Arylsulfatase C f form 300345 Microphthalmia isolated with coloboma 1 300471 Cubitus valgus with mental retardation and unusual facies 300484 Orofaciodigital syndrome VIII 300716 Mental retardation X-linked 95 300719 Deafness cataract retinitis pigmentosa and sperm abnormalities 300864 Cerebral-cerebellar-coloboma syndrome X-linked 309050 Lutheran suppressor X-linked 301067 Family with seq…	NA	1CG-001|3CG-035|3CG-042|3CG-047|3CG-064|3CG-173|8CG-004
DGC	PHF6	7	100	X	q11.1|q28	300345 Microphthalmia isolated with coloboma 1 300471 Cubitus valgus with mental retardation and unusual facies 300484 Orofaciodigital syndrome VIII 300716 Mental retardation X-linked 95 300719 Deafness cataract retinitis pigmentosa and sperm abnormalities 300864 Cerebral-cerebellar-coloboma syndrome X-linked 309050 Lutheran suppressor X-linked 300010 A-11 gene 300074 X chromosome-controlling ele…	PHF6|0.688254622|8.85%	1CG-001|3CG-035|3CG-042|3CG-047|3CG-064|3CG-173|8CG-004
DGC	PHF8	7	100	X	p22.33|p11.1	301780 Arylsulfatase C f form 300345 Microphthalmia isolated with coloboma 1 300471 Cubitus valgus with mental retardation and unusual facies 300484 Orofaciodigital syndrome VIII 300716 Mental retardation X-linked 95 300719 Deafness cataract retinitis pigmentosa and sperm abnormalities 300864 Cerebral-cerebellar-coloboma syndrome X-linked 309050 Lutheran suppressor X-linked 301067 Family with seq…	PHF8|0.457307336|17.8%	1CG-001|3CG-035|3CG-042|3CG-047|3CG-064|3CG-173|8CG-004
DGC	PHKA1	7	100	X	q11.1|q28	300345 Microphthalmia isolated with coloboma 1 300471 Cubitus valgus with mental retardation and unusual facies 300484 Orofaciodigital syndrome VIII 300716 Mental retardation X-linked 95 300719 Deafness cataract retinitis pigmentosa and sperm abnormalities 300864 Cerebral-cerebellar-coloboma syndrome X-linked 309050 Lutheran suppressor X-linked 300010 A-11 gene 300074 X chromosome-controlling ele…	PHKA1|0.321003105|26.08%	1CG-001|3CG-035|3CG-042|3CG-047|3CG-064|3CG-173|8CG-004
DGC	PHKA1-AS1	7	100	X	q11.1|q28	300345 Microphthalmia isolated with coloboma 1 300471 Cubitus valgus with mental retardation and unusual facies 300484 Orofaciodigital syndrome VIII 300716 Mental retardation X-linked 95 300719 Deafness cataract retinitis pigmentosa and sperm abnormalities 300864 Cerebral-cerebellar-coloboma syndrome X-linked 309050 Lutheran suppressor X-linked 300010 A-11 gene 300074 X chromosome-controlling ele…	NA	1CG-001|3CG-035|3CG-042|3CG-047|3CG-064|3CG-173|8CG-004
DGC	PHKA2	7	100	X	p22.33|p11.1	301780 Arylsulfatase C f form 300345 Microphthalmia isolated with coloboma 1 300471 Cubitus valgus with mental retardation and unusual facies 300484 Orofaciodigital syndrome VIII 300716 Mental retardation X-linked 95 300719 Deafness cataract retinitis pigmentosa and sperm abnormalities 300864 Cerebral-cerebellar-coloboma syndrome X-linked 309050 Lutheran suppressor X-linked 301067 Family with seq…	PHKA2|0.272649298|29.68%	1CG-001|3CG-035|3CG-042|3CG-047|3CG-064|3CG-173|8CG-004
DGC	PHKA2-AS1	7	100	X	p22.33|p11.1	301780 Arylsulfatase C f form 300345 Microphthalmia isolated with coloboma 1 300471 Cubitus valgus with mental retardation and unusual facies 300484 Orofaciodigital syndrome VIII 300716 Mental retardation X-linked 95 300719 Deafness cataract retinitis pigmentosa and sperm abnormalities 300864 Cerebral-cerebellar-coloboma syndrome X-linked 309050 Lutheran suppressor X-linked 301067 Family with seq…	NA	1CG-001|3CG-035|3CG-042|3CG-047|3CG-064|3CG-173|8CG-004
DGC	PIGA	7	100	X	p22.33|p11.1	301780 Arylsulfatase C f form 300345 Microphthalmia isolated with coloboma 1 300471 Cubitus valgus with mental retardation and unusual facies 300484 Orofaciodigital syndrome VIII 300716 Mental retardation X-linked 95 300719 Deafness cataract retinitis pigmentosa and sperm abnormalities 300864 Cerebral-cerebellar-coloboma syndrome X-linked 309050 Lutheran suppressor X-linked 301067 Family with seq…	PIGA|0.309008024|26.91%	1CG-001|3CG-035|3CG-042|3CG-047|3CG-064|3CG-173|8CG-004
DGC	PIM2	7	100	X	p22.33|p11.1	301780 Arylsulfatase C f form 300345 Microphthalmia isolated with coloboma 1 300471 Cubitus valgus with mental retardation and unusual facies 300484 Orofaciodigital syndrome VIII 300716 Mental retardation X-linked 95 300719 Deafness cataract retinitis pigmentosa and sperm abnormalities 300864 Cerebral-cerebellar-coloboma syndrome X-linked 309050 Lutheran suppressor X-linked 301067 Family with seq…	PIM2|0.234770618|32.95%	1CG-001|3CG-035|3CG-042|3CG-047|3CG-064|3CG-173|8CG-004
DGC	PIN4	7	100	X	q11.1|q28	300345 Microphthalmia isolated with coloboma 1 300471 Cubitus valgus with mental retardation and unusual facies 300484 Orofaciodigital syndrome VIII 300716 Mental retardation X-linked 95 300719 Deafness cataract retinitis pigmentosa and sperm abnormalities 300864 Cerebral-cerebellar-coloboma syndrome X-linked 309050 Lutheran suppressor X-linked 300010 A-11 gene 300074 X chromosome-controlling ele…	PIN4|0.129268487|45.97%	1CG-001|3CG-035|3CG-042|3CG-047|3CG-064|3CG-173|8CG-004
DGC	PINCR	7	100	X	p22.33|p11.1	301780 Arylsulfatase C f form 300345 Microphthalmia isolated with coloboma 1 300471 Cubitus valgus with mental retardation and unusual facies 300484 Orofaciodigital syndrome VIII 300716 Mental retardation X-linked 95 300719 Deafness cataract retinitis pigmentosa and sperm abnormalities 300864 Cerebral-cerebellar-coloboma syndrome X-linked 309050 Lutheran suppressor X-linked 301067 Family with seq…	NA	1CG-001|3CG-035|3CG-042|3CG-047|3CG-064|3CG-173|8CG-004
DGC	PIR	7	100	X	p22.33|p11.1	301780 Arylsulfatase C f form 300345 Microphthalmia isolated with coloboma 1 300471 Cubitus valgus with mental retardation and unusual facies 300484 Orofaciodigital syndrome VIII 300716 Mental retardation X-linked 95 300719 Deafness cataract retinitis pigmentosa and sperm abnormalities 300864 Cerebral-cerebellar-coloboma syndrome X-linked 309050 Lutheran suppressor X-linked 301067 Family with seq…	PIR|0.499774334|15.81%	1CG-001|3CG-035|3CG-042|3CG-047|3CG-064|3CG-173|8CG-004
DGC	PIR-FIGF	7	100	X	p22.33|p11.1	301780 Arylsulfatase C f form 300345 Microphthalmia isolated with coloboma 1 300471 Cubitus valgus with mental retardation and unusual facies 300484 Orofaciodigital syndrome VIII 300716 Mental retardation X-linked 95 300719 Deafness cataract retinitis pigmentosa and sperm abnormalities 300864 Cerebral-cerebellar-coloboma syndrome X-linked 309050 Lutheran suppressor X-linked 301067 Family with seq…	NA	1CG-001|3CG-035|3CG-042|3CG-047|3CG-064|3CG-173|8CG-004
DGC	PJA1	7	100	X	q11.1|q28	300345 Microphthalmia isolated with coloboma 1 300471 Cubitus valgus with mental retardation and unusual facies 300484 Orofaciodigital syndrome VIII 300716 Mental retardation X-linked 95 300719 Deafness cataract retinitis pigmentosa and sperm abnormalities 300864 Cerebral-cerebellar-coloboma syndrome X-linked 309050 Lutheran suppressor X-linked 300010 A-11 gene 300074 X chromosome-controlling ele…	PJA1|0.015979237|76.49%	1CG-001|3CG-035|3CG-042|3CG-047|3CG-064|3CG-173|8CG-004
DGC	PLAC1	7	100	X	q11.1|q28	300345 Microphthalmia isolated with coloboma 1 300471 Cubitus valgus with mental retardation and unusual facies 300484 Orofaciodigital syndrome VIII 300716 Mental retardation X-linked 95 300719 Deafness cataract retinitis pigmentosa and sperm abnormalities 300864 Cerebral-cerebellar-coloboma syndrome X-linked 309050 Lutheran suppressor X-linked 300010 A-11 gene 300074 X chromosome-controlling ele…	PLAC1|0.005696699|84.98%	1CG-001|3CG-035|3CG-042|3CG-047|3CG-064|3CG-173|8CG-004
DGC	PLP1	7	100	X	q11.1|q28	300345 Microphthalmia isolated with coloboma 1 300471 Cubitus valgus with mental retardation and unusual facies 300484 Orofaciodigital syndrome VIII 300716 Mental retardation X-linked 95 300719 Deafness cataract retinitis pigmentosa and sperm abnormalities 300864 Cerebral-cerebellar-coloboma syndrome X-linked 309050 Lutheran suppressor X-linked 300010 A-11 gene 300074 X chromosome-controlling ele…	PLP1|0.972222248|1.65%	1CG-001|3CG-035|3CG-042|3CG-047|3CG-064|3CG-173|8CG-004
DGC	PLP2	7	100	X	p22.33|p11.1	301780 Arylsulfatase C f form 300345 Microphthalmia isolated with coloboma 1 300471 Cubitus valgus with mental retardation and unusual facies 300484 Orofaciodigital syndrome VIII 300716 Mental retardation X-linked 95 300719 Deafness cataract retinitis pigmentosa and sperm abnormalities 300864 Cerebral-cerebellar-coloboma syndrome X-linked 309050 Lutheran suppressor X-linked 301067 Family with seq…	PLP2|0.037074851|66.75%	1CG-001|3CG-035|3CG-042|3CG-047|3CG-064|3CG-173|8CG-004
DGC	PLS3	7	100	X	q11.1|q28	300345 Microphthalmia isolated with coloboma 1 300471 Cubitus valgus with mental retardation and unusual facies 300484 Orofaciodigital syndrome VIII 300716 Mental retardation X-linked 95 300719 Deafness cataract retinitis pigmentosa and sperm abnormalities 300864 Cerebral-cerebellar-coloboma syndrome X-linked 309050 Lutheran suppressor X-linked 300010 A-11 gene 300074 X chromosome-controlling ele…	PLS3|0.519450248|15.04%	1CG-001|3CG-035|3CG-042|3CG-047|3CG-064|3CG-173|8CG-004
DGC	PLS3-AS1	7	100	X	q11.1|q28	300345 Microphthalmia isolated with coloboma 1 300471 Cubitus valgus with mental retardation and unusual facies 300484 Orofaciodigital syndrome VIII 300716 Mental retardation X-linked 95 300719 Deafness cataract retinitis pigmentosa and sperm abnormalities 300864 Cerebral-cerebellar-coloboma syndrome X-linked 309050 Lutheran suppressor X-linked 300010 A-11 gene 300074 X chromosome-controlling ele…	NA	1CG-001|3CG-035|3CG-042|3CG-047|3CG-064|3CG-173|8CG-004
DGC	PLXNA3	7	100	X	q11.1|q28	300345 Microphthalmia isolated with coloboma 1 300471 Cubitus valgus with mental retardation and unusual facies 300484 Orofaciodigital syndrome VIII 300716 Mental retardation X-linked 95 300719 Deafness cataract retinitis pigmentosa and sperm abnormalities 300864 Cerebral-cerebellar-coloboma syndrome X-linked 309050 Lutheran suppressor X-linked 300010 A-11 gene 300074 X chromosome-controlling ele…	PLXNA3|0.193609937|37.46%	1CG-001|3CG-035|3CG-042|3CG-047|3CG-064|3CG-173|8CG-004
DGC	PLXNB3	7	100	X	q11.1|q28	300345 Microphthalmia isolated with coloboma 1 300471 Cubitus valgus with mental retardation and unusual facies 300484 Orofaciodigital syndrome VIII 300716 Mental retardation X-linked 95 300719 Deafness cataract retinitis pigmentosa and sperm abnormalities 300864 Cerebral-cerebellar-coloboma syndrome X-linked 309050 Lutheran suppressor X-linked 300010 A-11 gene 300074 X chromosome-controlling ele…	PLXNB3|0.0327359|68.27%	1CG-001|3CG-035|3CG-042|3CG-047|3CG-064|3CG-173|8CG-004
DGC	PNCK	7	100	X	q11.1|q28	300345 Microphthalmia isolated with coloboma 1 300471 Cubitus valgus with mental retardation and unusual facies 300484 Orofaciodigital syndrome VIII 300716 Mental retardation X-linked 95 300719 Deafness cataract retinitis pigmentosa and sperm abnormalities 300864 Cerebral-cerebellar-coloboma syndrome X-linked 309050 Lutheran suppressor X-linked 300010 A-11 gene 300074 X chromosome-controlling ele…	PNCK|0.049981168|62.66%	1CG-001|3CG-035|3CG-042|3CG-047|3CG-064|3CG-173|8CG-004
DGC	PNMA3	7	100	X	q11.1|q28	300345 Microphthalmia isolated with coloboma 1 300471 Cubitus valgus with mental retardation and unusual facies 300484 Orofaciodigital syndrome VIII 300716 Mental retardation X-linked 95 300719 Deafness cataract retinitis pigmentosa and sperm abnormalities 300864 Cerebral-cerebellar-coloboma syndrome X-linked 309050 Lutheran suppressor X-linked 300010 A-11 gene 300074 X chromosome-controlling ele…	PNMA3|0.000835607|96.46%	1CG-001|3CG-035|3CG-042|3CG-047|3CG-064|3CG-173|8CG-004
DGC	PNMA5	7	100	X	q11.1|q28	300345 Microphthalmia isolated with coloboma 1 300471 Cubitus valgus with mental retardation and unusual facies 300484 Orofaciodigital syndrome VIII 300716 Mental retardation X-linked 95 300719 Deafness cataract retinitis pigmentosa and sperm abnormalities 300864 Cerebral-cerebellar-coloboma syndrome X-linked 309050 Lutheran suppressor X-linked 300010 A-11 gene 300074 X chromosome-controlling ele…	PNMA5|0.000957777|95.73%	1CG-001|3CG-035|3CG-042|3CG-047|3CG-064|3CG-173|8CG-004
DGC	PNMA6A	7	100	X	q11.1|q28	300345 Microphthalmia isolated with coloboma 1 300471 Cubitus valgus with mental retardation and unusual facies 300484 Orofaciodigital syndrome VIII 300716 Mental retardation X-linked 95 300719 Deafness cataract retinitis pigmentosa and sperm abnormalities 300864 Cerebral-cerebellar-coloboma syndrome X-linked 309050 Lutheran suppressor X-linked 300010 A-11 gene 300074 X chromosome-controlling ele…	PNMA6A|0.001988791|91.03%	1CG-001|3CG-035|3CG-042|3CG-047|3CG-064|3CG-173|8CG-004
[truncated: 2,576 more rows]

## Sheet: Intestinal
Table S1. LOH genes in IGC. To identify relevant genes (cut-off, ≥3) cells are filled with gray.
[truncated: 2,491 more rows]

[truncated: 2 more sheets: NAG, Readme]
